# Supplementary material for: Effects of estrogens and antiestrogens on gonadal sex differentiation and embryonic development in the domestic fowl (Gallus gallus domesticus)
Source: PeerJ. 2018 Jul 3;6:e5094. doi: 10.7717/peerj.5094 (PMC6034593; doi:10.7717/peerj.5094)
Supplement: Supplemental Information 1 [file peerj-06-5094-s001.xlsx]

## Sheet: fulvestrant experiment no. 1
substance:	fulvestrant										substance:	fulvestrant										substance:	fulvestrant						substance:	fulvestrant				substance:	fulvestrant				substance:	fulvestrant						substance:	fulvestrant
experiment no.:	1										experiment no.:	1										experiment no.:	1						experiment no.:	1				experiment no.:	1				experiment no.:	1						experiment no.:	1
endpoint:	cortex thickness [µm]										endpoint:	cortex thickness [µm]										endpoint:	seminiferous tubules [%]		total area of picture=	136000	µm² = 100%		endpoint:	gonad surface area [mm²]				endpoint:	gonad surface area [mm²]				endpoint:	mortality [%]						endpoint:	malformations
genetic sex:	female										genetic sex:	male										genetic sex:	male						genetic sex:	female				genetic sex:	male				genetic sex:	male + female						genetic sex:	male + female
test group	embryo no.	slice no.	values measured on slice [µm]					slice mean [µm]	embryo mean [µm]		test group	embryo no.	slice no.	measurements per slice [µm]					slice mean [µm]	embryo mean [µm]		test group	embryo no.	slice no.	slice mean [µm²]	slice mean [%]	embryo mean [%]		test group	embryo no.	left ovary [mm²]	right ovary [mm²]		test group	embryo no.	left testis [mm²]	right testis [mm²]		test group	∑ eggs	∑ unfertilized eggs	∑ vital embryos	∑ mortal embryos	mortality [%]		test group	∑ fertilized eggs	∑malformed embryos	∑ malformations
			1	2	3	4	5							1	2	3	4	5
untreated control	1	1	111.92	118.76	115.76	106.68	110.95	112.814	101.354		untreated control	1	1	12.8	11	13.6	12.8	10.2	12.08	13.308		untreated control	1	1	56638.2	41.6457	31.4426		untreated control	1	9.92378	2.46907		untreated control	1	3.46483	3.15727		untreated control	24	2	18	4	18.1818		untreated control	22	0	0
		2	94.17	101.33	101.89	98.63	110.03	101.21					2	12.3	10.6	13.1	11.8	12.7	12.1					2	38554.9	28.3492				2	9.51963	2.69564			2	3.6047	4.18717		solvent control	22	2	17	3	15		solvent control	20	0	0
		3	93.17	93.71	115.59	113.21	95.28	102.192					3	10.6	14	8.2	10.9	15.1	11.76					3	39118.7	28.7637				3	9.32562	2.39485			3	4.68218	3.80019		0,1 µg fulvestrant/g egg	22	3	14	5	26.3158		0,1 µg fulvestrant/g egg	19	2	2
		4	86.92	91.38	115.26	122.84	87.52	100.784					4	15.9	15.9	12.8	15	14.4	14.8					4	41420.6	30.4563				4	9.86794	1.85061			4	3.23153	4.01829		1 µg fulvestrant/g egg	22	0	17	5	22.7273		1 µg fulvestrant/g egg	22	1	2
		5	90.07	100.06	91.93	91.97	90.75	92.956					5	14	12.9	14.8	13.9	15.2	14.16					5	39371.8	28.9499				5	9.91963	2.99978			5	3.75097	3.60344		10 µg fulvestrant/g egg	22	3	13	6	31.5789		10 µg fulvestrant/g egg	19	1	1
		6	160.56	95.93	103.16	113.1	89	112.35					6	15.1	15.3	12.7	15.3	15.3	14.74					6	59626.7	43.8432				6	9.86102	2.13541			6	5.76115	4.97516		20 ng EE2/g egg	22	0	12	10	45.4545		20 ng EE2/g egg	22	1	1
		7	114.92	136.36	148.12	92.75	74.33	113.296					7	14	17.1	13.4	15.4	14.1	14.8					7	44668.5	32.8445				7	10.9364	2.10864			7	5.06841	3.70806		0,1 µg fulvestrant/g egg + 20 ng EE2/g egg	22	2	13	7	35		0,1 µg fulvestrant/g egg + 20 ng EE2/g egg	20	2	6
		8	96.9	75.3	72.67	88.43	89.73	84.606					8	13.9	11.8	19.2	11.9	15	14.36					8	38075.3	27.9965				8	11.4427	3.92534		solvent control	1	4.37217	4.27305		1 µg fulvestrant/g egg + 20 ng EE2/g egg	22	0	18	4	18.1818		1 µg fulvestrant/g egg + 20 ng EE2/g egg	22	1	1
		9	96.72	105.01	87.6	87.69	82.89	91.982					9	13.4	12.8	11.1	11.9	10.4	11.92					9	43260.3	31.809				9	11.1895	2.47264			2	3.55004	3.50491		10 µg fulvestrant/g egg + 20 ng EE2/g egg	22	4	12	6	33.3333		10 µg fulvestrant/g egg + 20 ng EE2/g egg	18	2	3
		10	-	-	-	-	-	-					10	11.9	14.6	11.4	12.8	11.1	12.36					10	26884.1	19.7677				10	10.4785	2.52327			3	3.60782	4.14322
	2	1	213.31	267.97	203.17	199.84	180.74	213.006	198.526			2	1	10.6	8.8	6.2	10	9	8.92	9.796			2	1	42907.3	31.5495	30.6075			11	10.3427	2.10358			4	4.58477	3.84117
		2	266.55	130.81	219.22	221.1	264.58	220.452					2	9.1	9.7	8.7	10	6.9	8.88					2	40923.2	30.0906			solvent control	1	8.84793	1.7442			5	3.84801	3.80518
		3	205.79	210.48	177.51	148.85	199.4	188.406					3	10	13.4	10.6	12.8	12.8	11.92					3	37930.6	27.8901				2	9.63325	2.0786		0,1 µg fulvestrant/g egg	1	4.17995	3.82577
		4	214.82	201.17	194.12	182.57	168.07	192.15					4	11.2	10.3	8.7	10.6	11.3	10.42					4	37221.5	27.3687				3	9.24033	1.67519			2	3.65988	3.4011
		5	127.68	176.93	175.98	185.23	176.67	168.498					5	8.1	7.2	7.5	9.3	7.8	7.98					5	45563.7	33.5027				4	7.93196	2.47494			3	4.2004	3.44899
		6	124.95	157.38	214.87	163.13	140.06	160.078					6	10	10.9	7.5	9.4	10.6	9.68					6	45256.1	33.2765				5	8.79172	1.33447			4	4.01242	3.27484
		7	158.14	159.48	203.39	170.32	161.18	170.502					7	7.2	6.6	10.7	7.2	7.5	7.84					7	50403.9	37.0617				6	6.50037	2.39842			5	1.98855	1.68189
		8	264.33	191	306.6	174.36	222.94	231.846					8	11.2	10.6	11.3	11.5	11.2	11.16					8	44209.2	32.5068				7	8.93315	1.65816			6	4.51138	3.49256
		9	199.49	240.96	213.34	285.99	243.39	236.634					9	11.2	13.1	9.4	10.4	10.6	10.94					9	36313.8	26.7013				8	8.71029	1.39872			7	4.88459	3.8808
		10	224.11	186.2	168.41	212.25	227.46	203.686					10	10.9	9	8.3	11.3	11.6	10.22					10	35532.8	26.1271				9	6.55852	1.7381		1 µg fulvestrant/g egg	1	4.3318	3.65311
	3	1	156.15	177.89	142.54	158.1	163.76	159.688	175.641			3	1	13.8	10.8	10	11.4	11.8	11.56	10.72			3	1	37143.5	27.3114	28.2356			10	8.30109	1.82622			2	4.04387	3.36072
		2	151.02	183.17	212.9	186.96	163.72	179.554					2	10.4	10.6	12.8	13.2	11.6	11.72					2	42105.2	30.9597				11	7.6601	1.5989			3	3.6221	3.41151
		3	184.57	159.11	234.56	213.44	236.91	205.718					3	12.5	11.9	11.7	12.2	11.1	11.88					3	40544.2	29.8119				12	7.68821	1.74636			4	3.73899	3.42631
		4	202.6	168.79	215.41	220.24	225.81	206.57					4	6.9	9.8	8.2	7.5	8.7	8.22					4	41659.2	30.6318				13	8.25164	1.77833			5	3.86831	3.67088
		5	233.67	111.13	228.87	122.59	142.74	167.8					5	11.7	9.4	10.7	10.4	13.7	11.18					5	39840.2	29.2943			0,1 µg fulvestrant/g egg	1	9.24755	1.17586			6	4.3312	3.4217
		6	151.68	243.31	131.41	187.83	129.52	168.75					6	12.3	12.2	11.3	12.4	11.5	11.94					6	37910.7	27.8755				2	9.31135	2.9301			7	3.38846	-
		7	149.39	134.18	176.65	127.4	195.97	156.718					7	12.7	11.1	10.1	10.1	11.2	11.04					7	39512.1	29.053				3	9.78517	1.20375		10 µg fulvestrant/g egg	1	3.75045	3.15861
		8	219.36	180.6	190.3	181.42	149.87	184.31					8	9.5	9.2	10.2	11.5	12.7	10.62					8	37933	27.8919				4	9.31261	2.70129			2	3.42415	3.21133
		9	166.51	161.52	171.83	205.18	202.36	181.48					9	9.6	9.9	10.1	10.2	9.5	9.86					9	32070.8	23.5815				5	8.25104	1.94282			3	2.47933	2.13392
		10	160.87	143.91	137.13	152.24	134.94	145.818					10	7.3	11.1	9	10.5	8	9.18					10	35284.8	25.9447				6	8.50342	1.36861			4	4.53644	3.37098
	4	1	97.37	90.84	87.13	73.22	66.26	82.964	130.694			4	1	10	7.4	8.1	12	11	9.7	10.13			4	1	21928.3	16.1238	19.808			7	10.4172	2.02164			5	5.29558	4.56254
		2	95.96	101.83	76.78	72.67	85.93	86.634					2	8.2	10	9.5	6.8	8.1	8.52					2	21296.4	15.6591				8	9.98847	1.355			6	4.18635	3.10187
		3	176.67	168.79	90.42	131.43	146.75	142.812					3	6.9	9.4	8.8	7.8	9.8	8.54					3	21018.7	15.4549			1 µg fulvestrant/g egg	1	9.37597	2.13117			7	4.08618	3.32168
		4	136.49	111.03	156.85	149.18	123.43	135.396					4	8.3	8.6	10.9	11.9	12.3	10.4					4	31722.5	23.3254				2	9.20657	2.41538			8	4.16634	3.0902
		5	115.01	141.69	148.67	143.91	177.77	145.41					5	9.5	10	9.6	12.4	12.8	10.86					5	30748.8	22.6094				3	8.14069	2.8463		20 ng EE2/g egg	1	5.83589	3.88474
		6	136.67	92.53	135.87	122.51	113.35	120.186					6	11.7	12.7	8.6	11.6	10	10.92					6	31626.4	23.2547				4	6.85173	1.67043			2	5.83819	3.50357
		7	122.6	134.48	138.25	213.55	174.43	156.662					7	8.3	8.2	9.9	8.7	10.5	9.12					7	29504.5	21.6945				5	7.77588	1.98788			3	6.68598	4.11496
		8	165.38	207.37	166.67	131.66	195.66	173.348					8	10.7	11.1	10.7	11.2	9.7	10.68					8	27808.6	20.4475				6	8.98372	2.38838			4	7.40065	3.74546
		9	129.23	183.27	109.26	162.64	165.53	149.986					9	7	9.5	9.2	8.7	8.1	8.5					9	28638	21.0574				7	8.9968	1.6488			5	7.53041	3.70717
		10	92.64	83.6	113.7	122.82	154.95	113.542					10	13.4	11.3	14.1	15.3	16.2	14.06					10	25096.1	18.453				8	10.055	1.72643		0,1 µg fulvestrant/g egg + 20 ng EE2/g egg	1	4.96721	3.70769
	5	1	130.86	105.33	77.57	103.36	81.94	99.812	99.9792			5	1	8.5	6.9	7.1	10	9.3	8.36	9.72			5	1	35266.9	25.9315	27.6841			9	9.80458	2.09258			2	5.11704	4.06224
		2	107.55	108.33	91.58	95.84	90.19	98.698					2	10.6	8.8	8.9	8.9	8.7	9.18					2	34657.9	25.4838			10 µg fulvestrant/g egg	1	8.87054	1.98966			3	5.94988	3.51034
		3	109.42	87.6	96.72	104.57	94.17	98.496					3	12.4	9.7	8.1	10.7	10.1	10.2					3	35528.9	26.1242				2	7.72739	1.56023			4	7.20457	5.09161
		4	105.65	100.22	118.48	136.41	97.79	111.71					4	9.2	9.2	8.6	8.1	10.7	9.16					4	39483.7	29.0321				3	8.83299	2.45769			5	3.61652	2.36102
		5	112.7	102.5	126.17	110.01	84.86	107.248					5	9.8	12.5	10.4	12.3	10.1	11.02					5	40939.7	30.1027				4	10.8795	2.28621			6	4.54179	3.54967
		6	94.4	87.45	113.98	116.2	110.02	104.41					6	10.1	10.5	7.7	8.2	7.9	8.88					6	33705.4	24.7834				5	8.25193	1.75944		1 µg fulvestrant/g egg + 20 ng EE2/g egg	1	5.98468	4.59578
		7	98.42	105.4	123.88	100.17	120.83	109.74					7	10.4	10.4	8.7	9.9	8.8	9.64					7	35796.8	26.3212			20 ng EE2/g egg	1	8.7271	1.88905			2	6.7204	3.90995
		8	86.51	90.16	96.18	97	93.41	92.652					8	10.7	10.5	11.1	9.9	12.1	10.86					8	42349.4	31.1393				2	7.25996	2.00855			3	4.79358	3.03763
		9	120.97	112.46	126.46	97	76.16	106.61					9	10.4	10.5	12.1	12.1	10.6	11.14					9	42062.5	30.9283				3	8.36206	1.60916			4	7.32979	3.46542
		10	82.62	62.95	73.79	61.75	70.97	70.416					10	10.8	9.4	6.4	7	10.2	8.76					10	36712.5	26.9945				4	9.97375	2.05659		10 µg fulvestrant/g egg + 20 ng EE2/g egg	1	4.67557	3.87931
	6	1	106.85	106.2	83.02	85.9	83.52	93.098	100.946			6	1	12.2	10.5	7.5	10.3	9.5	10	9.932			6	1	42056.3	30.9237	31.9399			5	8.32555	2.11043			2	4.63102	3.9475
		2	95.17	121.48	79.04	85.9	89.2	94.158					2	9.2	12.3	10.5	8.1	9.5	9.92					2	43147.8	31.7263				6	8.7416	1.4855			3	3.40943	2.35812
		3	89.46	97.09	80.15	60.39	73.55	80.128					3	8.9	12.7	10	9.7	11.3	10.52					3	43697.3	32.1304				7	7.43954	1.50758			4	3.60827	2.25602
		4	144.98	120.07	137.59	147.18	198.72	149.708					4	9.8	10	8.5	10.9	7.7	9.38					4	41507.8	30.5204			0,1 µg fulvestrant/g egg + 20 ng EE2/g egg	1	5.06901	0.99539			5	4.48111	4.89649
		5	119.39	112.5	129.4	160	149.17	134.092					5	12.6	12.1	12.2	11.5	12.6	12.2					5	41947.8	30.844				2	9.84949	1.81737			6	4.31313	3.49004
		6	100.59	111.5	87.5	71.2	82.3	90.618					6	8.7	8.8	9.7	12.8	8.4	9.68					6	48855	35.9228				3	11.503	2.1914			7	3.71349	2.17393
		7	81.18	62.66	92.5	108.46	84.34	85.828					7	10.2	11.3	8.7	11.8	9.1	10.22					7	45317	33.3213				4	10.8719	2.09883
		8	46.34	59.66	85.33	71.63	67.63	66.118					8	12.8	11.8	12.2	10.9	10.3	11.6					8	43251.6	31.8026				5	7.66396	1.2816
		9	90.19	76.78	64.51	62.74	51.4	69.124					9	9.9	6	7.7	6.5	7.5	7.52					9	41883.9	30.797				6	7.64634	1.33871
		10	143.33	106.25	142.75	144.92	195.69	146.588					10	13.3	7.4	7.3	6.8	6.6	8.28					10	42718.5	31.4107				7	8.74673	1.64798
	7	1	95.96	138.21	149.5	164.98	99.11	129.552	149.347		solvent control	1	1	11.3	11.7	11	14.1	12.2	12.06	11.47		solvent control	1	1	38523.8	28.3263	28.8676			8	7.71609	2.13943
		2	130.79	188.29	185.17	166.96	82.62	150.766					2	13.1	14.7	13.3	14	13.5	13.72					2	33914.9	24.9374				9	7.46661	-
		3	205.7	172.65	97.39	124.1	114.22	142.812					3	12.2	10.3	11.3	11.6	12.5	11.58					3	38850.6	28.5666			1 µg fulvestrant/g egg + 20 ng EE2/g egg	1	7.38868	1.55004
		4	162.91	177.81	94.67	83.94	164.19	136.704					4	14.1	11.7	12.4	7.2	8.4	10.76					4	44077	32.4096				2	8.19326	1.9185
		5	106.23	140.8	170.78	183.37	111.52	142.54					5	16.2	12.5	11.8	11.6	11.8	12.78					5	35658.7	26.2196				3	8.39738	1.37805
		6	171.37	141.82	161.54	180.63	133.61	157.794					6	11.4	11.5	10.4	10.6	10.6	10.9					6	29969.8	22.0366				4	9.84176	1.40973
		7	216.23	125.72	178.08	173.41	194.37	177.562					7	11.5	11.2	10.6	13.1	10.3	11.34					7	40156.5	29.5268				5	8.98654	1.42304
		8	196.63	137.42	180.3	187.18	104.17	161.14					8	13	13.7	10.3	10.9	10.9	11.76					8	42672.4	31.3768				6	7.52528	1.79752
		9	153.91	140.57	143.3	126.32	134	139.62					9	11.4	10.2	9.7	7	9.1	9.48					9	43113.6	31.7012				7	9.40497	2.33217
		10	168.63	151.53	156.6	153.95	144.17	154.976					10	12.2	9.3	11.9	10.5	7.7	10.32					10	45662.4	33.5753				8	8.04149	1.52684
	8	1	153.74	119.95	117.39	106.7	129.41	125.438	124.228			2	1	10.1	11.2	10.6	11.5	12.6	11.2	11.468			2	1	37128.1	27.3001	31.7897			9	8.83775	1.80622
		2	131.06	138.69	107.89	101.46	128.72	121.564					2	11.6	13.1	11.3	9.6	9.7	11.06					2	34325	25.239				10	8.25587	1.1253
		3	135.94	108.03	102.49	131.53	120.42	119.682					3	8.8	7.7	11.6	9	9	9.22					3	43537.7	32.013				11	11.3193	2.45761
		4	117.26	103.86	93.55	117.33	96.27	105.654					4	12.6	12.2	11.1	13.4	11.8	12.22					4	47434.5	34.8783				12	10.0199	1.45932
		5	147.31	123.52	110.11	114.48	100.18	119.12					5	13	12.4	14	13.8	14	13.44					5	38576.7	28.3652				13	7.43256	1.65043
		6	126.1	129.05	111.41	122.03	97.3	117.178					6	11.5	12.6	11.3	14.3	13.4	12.62					6	43965.5	32.3276				14	8.6479	1.56261
		7	159.96	148.89	126.52	117.22	115.18	133.554					7	11	9.4	10.6	12.3	11.1	10.88					7	35835.4	26.3496			10 µg fulvestrant/g egg + 20 ng EE2/g egg	1	9.90162	1.48728
		8	131.85	124.35	124.95	132.25	106.17	123.914					8	13.9	10	8.4	11.8	8.7	10.56					8	49647.9	36.5058				2	12.0486	2.42385
		9	129.67	157.18	116.74	128.65	136.39	133.726					9	12.8	11.7	13.2	10.6	13.8	12.42					9	46804.5	34.4151				3	10.2196	1.25639
		10	172.88	143.99	132.21	147.92	115.24	142.448					10	11.3	12.3	11.3	9	11.4	11.06					10	55085.1	40.5037				4	10.2501	1.72472
	9	1	184.53	172.45	178.14	135.41	141.82	162.47	150.23			3	1	10.1	11.8	10.7	10.8	9.4	10.56	9.958			3	1	30228.7	22.227	31.1895			5	13.1234	1.94021
		2	161.15	133.05	136.77	184.35	123.34	147.732					2	7.5	7.2	7	8.1	7.4	7.44					2	48952.9	35.9948				6	9.46594	1.66315
		3	153.32	158.9	202.03	169.22	167.87	170.268					3	8.8	7.5	9.1	9.1	8.2	8.54					3	42933	31.5684				7	11.9911	1.25825
		4	130.98	174.22	173.41	171.08	168.74	163.686					4	9.9	9.4	7.2	9.8	8.5	8.96					4	45853.7	33.716
		5	123.43	155.35	175.51	156.08	147.78	151.63					5	10.6	10.9	9.8	9.9	9.1	10.06					5	42301.6	31.1041
		6	157.57	142.75	171.7	189.74	162.11	164.774					6	8.4	10.5	13.7	10.7	11.8	11.02					6	45332.4	33.3326
		7	128.13	141.1	155.75	169.22	167.15	152.27					7	11.8	10.6	9.2	10.1	10.3	10.4					7	37755.8	27.7616
		8	120.83	130.26	132.67	154.03	162.35	140.028					8	7.8	9	8.7	8.9	10.4	8.96					8	35683.8	26.2381
		9	124.45	116.06	125.45	124.57	146.84	127.474					9	10.3	11.3	9.1	9.7	12	10.48					9	45999	33.8228
		10	128.6	121.12	126.19	119.45	114.47	121.966					10	14.5	13.9	11.8	12.8	12.8	13.16					10	49136.9	36.1301
	10	1	169.19	135.63	111.83	202.5	196.81	163.192	163.729			4	1	11.6	10	10.6	11.9	11.5	11.12	10.7			4	1	33137.2	24.3656	27.7357
		2	145.03	140.24	153.81	218.81	199.76	171.53					2	10.3	9.4	8.5	11	10.6	9.96					2	37267.8	27.4028
		3	198.25	141.16	173.33	197.12	195.07	180.986					3	11.9	11.5	11.6	10.6	11.3	11.38					3	33243.2	24.4435
		4	175.6	177.03	216.15	183.87	160.69	182.668					4	10.1	11.6	10.9	11.1	9.8	10.7					4	27795.2	20.4376
		5	160.32	160.76	180.63	197.52	233.3	186.506					5	10	10.3	9.4	12.3	11.7	10.74					5	41126	30.2397
		6	152.08	151.63	166.99	174.74	184.07	165.902					6	11.8	10.6	11.2	8.2	10.4	10.44					6	37748.5	27.7563
		7	136.77	137.57	190.53	149.44	193.44	161.55					7	11.2	12.2	11.5	11.5	9.3	11.14					7	42532	31.2735
		8	172.61	163.61	162.07	139.89	135.66	154.768					8	10.3	8.5	10.9	12.2	11.9	10.76					8	42180.6	31.0151
		9	150.7	95.03	89.45	185.76	155.48	135.284					9	10.1	9.1	10.7	10.4	8.1	9.68					9	47675.4	35.0554
		10	89.11	77.18	173.66	167.15	167.4	134.9					10	10.2	10	10.9	10.9	13.4	11.08					10	34499.3	25.3671
	11	1	232.78	194.18	217.6	172.08	191.63	201.654	174.418			5	1	12.1	11.4	13.5	10.6	12.8	12.08	10.064			5	1	40082	29.4721	31.6488
		2	167.76	219.28	168.4	190.9	143.53	177.974					2	12.5	13.6	9.1	8.9	10.2	10.86					2	47587.5	34.9908
		3	190.62	163.23	206.57	180.31	189.53	186.052					3	11.7	9.9	8.1	8.8	10.7	9.84					3	40905	30.0772
		4	176.33	240.66	219.43	135.1	146.77	183.658					4	11	7.5	13.5	11.2	8.5	10.34					4	44830.1	32.9633
		5	144.95	161.47	150.98	178.9	185.99	164.458					5	10	6.9	11.5	11.4	9.1	9.78					5	47222.8	34.7226
		6	189.39	209.07	147.97	149.18	224.82	184.086					6	9.7	6.2	10.3	10.7	10.3	9.44					6	42254	31.0691
		7	159	147.35	182.7	173.46	113.85	155.272					7	7.2	9.1	10	8.4	10.7	9.08					7	38834	28.5544
		8	137.49	179.33	153.63	204.43	182.1	171.396					8	10.6	8.1	6.6	9.3	7.9	8.5					8	40650.6	29.8901
		9	174.25	162.77	178.57	150.85	134.4	160.168					9	11.9	9.2	12.8	10.2	12.7	11.36					9	44418.7	32.6608
		10	184.13	140.87	140	143.34	188.95	159.458					10	8.7	11.3	9.7	9.1	8	9.36					10	43639.6	32.0879
solvent control	1	1	257.66	192.95	271.61	253.84	295.16	254.244	175.796		0,1 µg fulvestrant/g egg	1	1	9.8	11.3	11.4	10.3	10.7	10.7	11.362		0,1 µg fulvestrant/g egg	1	1	48943.7	35.988	32.6799
		2	239.95	220.64	188.6	154.61	159.9	192.74					2	10.3	10.9	10.6	11.3	10.8	10.78					2	38843	28.561
		3	228.11	217.53	265.75	214.12	222.36	229.574					3	13.5	12.8	10.3	12.2	12.2	12.2					3	47319.5	34.7938
		4	171.29	146.98	219.93	120.95	102.49	152.328					4	14.1	10.6	13.5	10.3	10.9	11.88					4	40924.1	30.0912
		5	185.02	161.74	174.39	166.54	212.36	180.01					5	11.1	14.2	10.9	12.2	10.3	11.74					5	46679.1	34.3229
		6	141.67	170.47	192.19	222.9	257.3	196.906					6	12.2	12.2	12.5	12.5	10	11.88					6	46199.8	33.9704
		7	165.36	162.13	220.65	175.74	119.06	168.588					7	12.8	13.2	13.2	9	10.3	11.7					7	39440.1	29.0001
		8	127	109.79	199.18	176.7	150.92	152.718					8	11.2	13.1	9.5	12.2	12.6	11.72					8	45282.1	33.2957
		9	112.04	92.38	127.99	98.09	98.65	105.83					9	10.3	10.9	10.9	9.1	10	10.24					9	41504.6	30.5181
		10	125.13	115.63	127.01	121.02	136.33	125.024					10	10.2	9.6	9.8	12.8	11.5	10.78					10	49310.7	36.2579
	2	1	128.57	138.09	162.18	146.89	137.06	142.558	119.449			2	1	11.2	9.1	12.5	7.8	9.8	10.08	11.244			2	1	50773.4	37.3334	34.4535
		2	148.73	153.32	148.16	112.81	109.18	134.44					2	9.3	13.4	11.2	13.2	13.9	12.2					2	44086	32.4162
		3	123.64	161.97	144.46	108.63	114.68	130.676					3	11.7	12.5	12.1	11.6	9.5	11.48					3	50447.1	37.0935
		4	115.98	102.26	125.35	152.58	146.55	128.544					4	11.4	11.5	12.4	11.7	10.8	11.56					4	48377.6	35.5718
		5	142.7	112.75	109.17	103.45	107.89	115.192					5	7.8	6.4	9.8	10.8	11	9.16					5	49919.9	36.7058
		6	107.84	119.06	136.24	106.23	103.31	114.536					6	12.3	15.4	12.5	13.8	11.4	13.08					6	39307.2	28.9024
		7	110	105.1	154.44	122.28	74.56	113.276					7	12.7	13.2	11.5	12	14.1	12.7					7	42352.7	31.1417
		8	118.66	113.61	111.74	121.25	120.01	117.054					8	10.1	9.1	10.6	8.7	10.9	9.88					8	45175	33.2169
		9	90.22	81.09	84.08	126.8	100.68	96.574					9	11.1	10.9	12	11.3	10.6	11.18					9	50007.3	36.7701
		10	102.61	95.14	96.57	117.43	96.45	101.64					10	11.5	12.1	11.6	10.1	10.3	11.12					10	48120.9	35.383
	3	1	264.8	230.67	194.05	148.59	122.88	192.198	162.077			3	1	10.2	10.7	9	10.2	9.7	9.96	10.49			3	1	57006.1	41.9162	39.6261
		2	245.52	216.06	138.11	125.37	128.37	170.686					2	9.7	10	11.1	11.9	10.9	10.72					2	45481.7	33.4424
		3	218.98	156.46	190.65	165.45	125.24	171.356					3	10.5	9.1	8.1	7.8	11.1	9.32					3	63906	46.9897
		4	190.83	141.7	173.74	133.65	135.43	155.07					4	9.1	8.7	9.5	7.9	8.7	8.78					4	55540.4	40.8385
		5	175.03	125.24	151.28	93.17	133.24	135.592					5	8.3	7.5	10.2	8.1	8.2	8.46					5	49819	36.6316
		6	181.96	184.29	147.96	101	147.27	152.496					6	12.2	10.3	12.8	9.7	11.6	11.32					6	55504.5	40.8121
		7	179.17	183.34	170.85	160.02	184.33	175.542					7	10.4	10.9	11.4	13.6	11.8	11.62					7	51455.8	37.8351
		8	183.85	204.42	179.63	157.54	141.04	173.296					8	12	13.6	10.7	11.5	8.2	11.2					8	54377	39.9831
		9	196.7	163.15	222.81	166.67	146.78	179.222					9	13.6	8.7	9.5	10.6	11.1	10.7					9	54511.4	40.0819
		10	160.35	93.93	113.35	113.14	95.78	115.31					10	12	13.8	13.5	13.2	11.6	12.82					10	51313.7	37.7307
	4	1	112.67	119.35	101.6	102.23	84.86	104.142	118.559			4	1	9.7	10.4	9.7	8.3	10.9	9.8	11.738			4	1	43301.4	31.8393	30.5292
		2	91.53	114.7	97.74	91.92	115.64	102.306					2	15.3	13.2	13.4	12.5	12.3	13.34					2	42685.8	31.3866
		3	127.69	79.18	102.5	114.36	109.25	106.596					3	11.9	10.3	11.9	12	9.4	11.1					3	38379.7	28.2204
		4	101.76	105.2	79.28	72.67	69	85.582					4	10.8	8.5	8	8.9	6.9	8.62					4	39757.5	29.2335
		5	135.82	74.89	120.38	104.73	97.18	106.6					5	11.3	11.4	14.7	14.5	17	13.78					5	36284.7	26.6799
		6	166.17	122.05	133.92	110.05	109.57	128.352					6	7.2	7	7.2	7.6	7.2	7.24					6	38890.3	28.5958
		7	142.52	192.54	196.33	116.51	119.32	153.444					7	13.7	10.3	9.5	7.5	10	10.2					7	59790.7	43.9637
		8	177.25	188.02	138.63	117.8	122.35	148.81					8	13.5	16	13.1	13.9	10.9	13.48					8	31764.4	23.3562
		9	189.56	176.78	162.13	113.24	75.65	143.472					9	15.8	16.9	13.1	13.5	15.3	14.92					9	43337.7	31.866
		10	99.51	112.28	105.48	94.66	119.48	106.282					10	13.9	14.8	12.8	16.7	16.3	14.9					10	41004.4	30.1503
	5	1	165.21	216.71	204.45	269.65	243.19	219.842	212.903			5	1	11.2	11.5	12.2	11.9	8.1	10.98	12.208			5	1	44306.3	32.5782	30.1019
		2	159.19	178	230.07	233.45	254.18	210.978					2	11.8	11.2	9.7	11	11.5	11.04					2	50361	37.0301
		3	239.89	203.36	179.66	190.15	244.53	211.518					3	11.8	15	14.6	12.2	13.3	13.38					3	37536.3	27.6002
		4	195.03	190.92	185	229.38	240.11	208.088					4	10.9	11.3	13.7	13.1	13.7	12.54					4	50588	37.1971
		5	204.18	241.67	235.04	217.58	286.87	237.068					5	12.3	11.9	8.9	13.1	11.1	11.46					5	34823.7	25.6057
		6	161.46	196.05	192.85	211.03	303.45	212.968					6	13.4	15.2	13	12.5	11.2	13.06					6	46585.2	34.2538
		7	235	238.51	234.82	243.48	263.52	243.066					7	16	11.2	15.4	13.1	14.7	14.08					7	35246.3	25.9164
		8	255.02	237.83	219.22	183.36	283.39	235.764					8	11.9	11.6	10.9	13.1	12.6	12.02					8	38102.5	28.0165
		9	185.34	190	169.17	135	205	176.902					9	12.6	13.6	11.5	11.5	9.4	11.72					9	33382.4	24.5459
		10	140.04	197.6	185.26	170.29	171	172.838					10	10.5	11.7	10.7	14.5	11.6	11.8					10	38454.1	28.2751
	6	1	181.6	210.73	199.03	105.48	109.2	161.208	113.839			6	1	10.3	12.3	15.9	17.6	17.9	14.8	11.92			6	1	43594.2	32.0546	35.589
		2	165.84	144.17	136.68	141.31	138.93	145.386					2	9.7	10.6	11.1	14	14.6	12					2	50209.6	36.9188
		3	136.8	140.52	124.11	130.07	117.33	129.766					3	14	13.4	13.1	11.9	11.2	12.72					3	53225.2	39.1362
		4	131.79	104.97	108.68	100.03	122.09	113.512					4	12.4	14.8	13.7	11.7	10.4	12.6					4	48705	35.8125
		5	98.56	103.9	108.59	126.89	113.85	110.358					5	11.3	11.9	9.7	8.4	10.5	10.36					5	46206.1	33.9751
		6	95.92	101.25	107.96	86.92	130.98	104.606					6	11.6	10.7	10.6	12.7	8.9	10.9					6	42191.7	31.0233
		7	82.18	99.59	85.9	103.45	88.9	92.004					7	13	14.5	14.1	11	14.3	13.38					7	47255.5	34.7467
		8	115.19	123.39	117.38	126.01	107.15	117.824					8	12.8	10.6	10	11.8	11.8	11.4					8	47434.5	34.8783
		9	112.81	45.89	64.36	85.46	91	79.904					9	9.4	9.8	10.2	12.2	9.8	10.28					9	58356.5	42.9092
		10	53.09	66.09	85.37	102.55	111.99	83.818					10	9.8	10.6	10.8	12.4	10.2	10.76					10	46831.9	34.4352
	7	1	184.25	160.72	169.02	167.86	156.53	167.676	167.682		1 µg fulvestrant/g egg	1	1	11.4	12.8	11.9	13.8	9.6	11.9	11.584		1 µg fulvestrant/g egg	1	1	51367.4	37.7701	29.1595
		2	165.25	169.61	187.78	196.5	153.79	174.586					2	9.7	9.8	8.9	10.6	12.2	10.24					2	35431.6	26.0526
		3	158.83	120.78	111.51	100.9	73.09	113.022					3	10.5	10.2	13.1	8.2	9.1	10.22					3	49552.9	36.436
		4	160.55	134.81	139.11	128.65	93.94	131.412					4	11.2	8.7	11.1	9.8	10.3	10.22					4	34651.7	25.4792
		5	137.85	146.18	135.65	117.45	116.22	130.67					5	8	10.6	9.1	12.9	10.3	10.18					5	36087.7	26.5351
		6	169.64	161.39	143.1	154.67	125.07	150.774					6	13.1	12.6	12.9	12.8	11.7	12.62					6	39554	29.0838
		7	233.1	193.81	170.74	174.68	159.21	186.308					7	7.4	10.3	7.4	10.4	10.4	9.18					7	34514.3	25.3782
		8	242.54	221.36	225.37	210.64	191.86	218.354					8	13.1	10.3	10.8	11.7	12.3	11.64					8	37328.7	27.4476
		9	235.12	237.32	196.98	162.89	155.36	197.534					9	13.1	17.3	13.7	12.4	11.9	13.68					9	43060.5	31.6621
		10	257.5	263.44	211.03	162.52	137.94	206.486					10	17.5	14.3	14.3	18.1	15.6	15.96					10	35020.3	25.7502
	8	1	149.5	127.83	128.29	142.08	95.92	128.724	152.611			2	1	10	8.7	8.6	9.3	9.7	9.26	13.5			2	1	42812.3	31.4796	34.1992
		2	151.22	119.88	107.76	125.19	86.81	118.172					2	10	12	7.9	9.7	8.7	9.66					2	37113.8	27.2896
		3	107.58	132.58	144.53	154.44	155.01	138.828					3	11.9	12.9	10.3	13.6	11.6	12.06					3	35846.7	26.3579
		4	103.29	126.43	141.44	164.83	161.52	139.502					4	15.9	14.7	12.2	13.7	13.6	14.02					4	45040.2	33.1178
		5	150.74	154.65	174.84	172.75	209.54	172.504					5	14.9	10.9	12.5	12.8	13.9	13					5	50340	37.0147
		6	141.19	103.69	154.54	165.03	161.88	145.266					6	18.6	15	13.9	13.7	14.7	15.18					6	52562.8	38.6491
		7	156.8	163.58	183.52	171.47	132.62	161.598					7	15.1	18.9	14.7	13.8	16.9	15.88					7	55152.1	40.553
		8	145.22	157.28	172.64	169.2	147.14	158.296					8	18.2	14	16.2	14.8	15.3	15.7					8	46925.2	34.5038
		9	174.88	217.24	162.52	164.2	191.56	182.08					9	14	13.2	16.1	13.2	13.7	14.04					9	44999.5	33.0879
		10	210.91	139.21	195.92	192.96	166.7	181.14					10	13.6	15.9	19.3	14.7	17.5	16.2					10	54316.1	39.9383
	9	1	169.36	168.53	151.59	131.41	181.84	160.546	135.835			3	1	15.5	15.6	11.7	11.5	12.5	13.36	12.838			3	1	55184.9	40.5771	33.4614
		2	147.35	133.05	131.11	129.94	132.57	134.804					2	12.8	15.7	12.6	10.6	10.7	12.48					2	50661.1	37.2508
		3	152.14	118.9	140.55	128.61	90.55	126.15					3	12.2	15.4	10.8	10.5	11.7	12.12					3	53289	39.1831
		4	133.96	132.71	100.64	95.87	114.24	115.484					4	14.2	14.3	13.7	15.6	11.2	13.8					4	38437.2	28.2626
		5	127.31	82.48	110.65	97.08	106.74	104.852					5	12.9	14.1	13.6	15.1	14.4	14.02					5	33490	24.625
		6	143.67	138.09	139.11	136.43	95.78	130.616					6	10.6	10.7	13	11.7	12.8	11.76					6	59647.3	43.8583
		7	127.55	126.8	75.9	107.56	92.52	106.066					7	10.6	10.3	11.2	14.6	13.5	12.04					7	53811	39.5669
		8	121.32	119.19	146.37	107.12	150.46	128.892					8	15.7	11.3	12.2	12.2	12.1	12.7					8	39415.3	28.9818
		9	200.35	212.5	201.35	152.97	145.79	182.592					9	12.7	11.6	13.2	15.3	14.1	13.38					9	42015	30.8934
		10	183.61	194.27	183.76	150.3	129.8	168.348					10	11.4	11.3	11.1	12.4	17.4	12.72					10	29124.1	21.4148
	10	1	282.9	159.9	117.05	87	117.28	152.826	147.488			4	1	11.2	9.7	10.3	9.7	10	10.18	11.616			4	1	39861	29.3096	32.0763
		2	190	165.5	133.86	134.04	110.81	146.842					2	11	8.2	10.3	11.8	10	10.26					2	34505.1	25.3714
		3	76.16	101.36	148.56	136.27	143.44	121.158					3	12.5	9.2	13.8	13.7	10.9	12.02					3	59563.9	43.797
		4	130.61	159.66	107.38	113.59	102.51	122.75					4	14.6	14.3	14.6	10.3	15.3	13.82					4	23491.4	17.2731
		5	228.63	220.01	136.26	164.22	176.97	185.218					5	13.4	14.7	13.7	17.5	13.1	14.48					5	45874.6	33.7313
		6	121.68	141.04	151.78	139.77	116.22	134.098					6	10.9	11.3	9.2	14	12	11.48					6	38656	28.4235
		7	160.78	125.28	172.42	208.89	168.69	167.212					7	13.2	11.2	10.6	12.5	9.8	11.46					7	47464.2	34.9001
		8	174.17	148.35	199.46	177.89	120.95	164.164					8	11.2	10.5	11.8	9.7	11.9	11.02					8	58579.5	43.0732
		9	125.55	58.41	163.13	154.84	195.8	139.546					9	10.1	12.2	11.2	11.3	8.3	10.62					9	33560.3	24.6767
		10	151.68	155.57	167.04	145.39	85.66	141.068					10	11.3	9.1	11.9	12.2	9.6	10.82					10	54681.6	40.2071
	11	1	129.72	149.59	126.12	110.26	124.81	128.1	134.616			5	1	7.9	10.4	8.9	10.7	11.3	9.84	9.858			5	1	57869.4	42.551	35.237
		2	148.01	164.89	170.66	175	162.51	164.214					2	10.7	10.2	10.8	10	8.5	10.04					2	45123	33.1787
		3	132.93	120.22	153.21	118.04	146.57	134.194					3	10.6	10.6	9.6	9	10.6	10.08					3	40773.7	29.9807
		4	150	132.67	124.35	103.78	123.56	126.872					4	10.1	11.2	11.1	9.6	10.7	10.54					4	42677.4	31.3804
		5	145.76	164.89	132.69	123.66	148.63	143.126					5	8.4	10.6	8.7	10.1	11.2	9.8					5	49880.2	36.6766
		6	136.84	114.83	128.51	103.16	137.12	124.092					6	8.4	7.7	7.9	9.8	9.8	8.72					6	51548.2	37.9031
		7	120.7	114.14	130.81	130.59	137.52	126.752					7	9.5	8.1	11	7.5	9.2	9.06					7	48436.7	35.6152
		8	135.62	108.48	130.29	146.78	172.42	138.718					8	10	8.6	12.7	10.1	11.4	10.56					8	49109.3	36.1098
		9	141.19	143.86	138.48	123.16	118.44	133.026					9	8.5	11.6	9.3	12.9	10.3	10.52					9	46360.9	34.0889
		10	147.25	148.85	94.51	115.77	128.97	127.07					10	9.1	9.2	9.8	10.1	8.9	9.42					10	47444.7	34.8858
	12	1	184.71	134.23	169.17	174.21	175.03	167.47	192.823			6	1	12.5	12.7	11	11.9	12.4	12.1	11.532			6	1	46020	33.8382	31.9399
		2	174.96	160.97	185.44	198.35	176.12	179.168					2	14	12.8	13.8	14.7	11.6	13.38					2	49302.5	36.2518
		3	180.77	193.74	221.98	169.83	169.46	187.156					3	12.9	11.3	10.9	11.8	11.7	11.72					3	51061.5	37.5452
		4	197.7	192.71	170.44	173.17	203.75	187.554					4	12.3	11.6	11.6	12.3	12.5	12.06					4	38367.2	28.2112
		5	248.19	174.95	201.25	173.17	166.89	192.89					5	11.3	11.6	10.5	10	11.3	10.94					5	53217.6	39.1306
		6	215.87	17.17	166.19	169.83	202.84	154.38					6	11.3	11.9	13	10.9	11.2	11.66					6	32183.1	23.664
		7	201.68	185.44	171.48	239.63	234.28	206.502					7	10.6	13.2	13.4	10.7	10.5	11.68					7	43388.3	31.9032
		8	225.08	212.14	181.2	181.6	189.48	197.9					8	12.5	9.5	10.8	11.7	11.2	11.14					8	44300.5	32.5739
		9	224.46	207.83	252.82	249.37	224.32	231.76					9	11.9	7.3	11.9	8.6	10.8	10.1					9	48667	35.7846
		10	213.08	245.47	220.99	224.32	213.37	223.446					10	10.5	10.1	12.5	9.9	9.7	10.54					10	27875.3	20.4965
	13	1	189.57	216.66	264.81	271.55	232.85	235.088	170.787			7	1	7.1	10.6	10.6	10.9	12.8	10.4	10.228			7	1	43929.4	32.301	28.1448
		2	154.94	193.48	202.85	180.02	153.97	177.052					2	8.4	10.7	10.8	8.4	10.5	9.76					2	31814.6	23.3931
		3	185.69	153.54	197.83	183.1	162.71	176.574					3	9	11.3	9.7	9.6	11.9	10.3					3	33996.8	24.9976
		4	239.51	195.39	148.1	130.84	111.33	165.034					4	8.8	10.3	9.6	10.6	10.1	9.88					4	40941.2	30.1038
		5	192.99	187.47	133.4	152.56	147.43	162.77					5	9	10.9	10.8	9	9.6	9.86					5	34558.4	25.4106
		6	160.08	189.74	173.09	195.06	181.68	179.93					6	9.1	9.8	9.2	7.8	10.3	9.24					6	35802	26.325
		7	198.67	166.89	172.79	131.2	113.34	156.578					7	10.7	9.8	10	9.3	10.6	10.08					7	35240.9	25.9124
		8	169.25	166.44	145.4	142.41	156.15	155.93					8	9.3	8.3	9.1	9.3	10.6	9.32					8	43163.6	31.7379
		9	133.16	133.87	170.52	160.17	159.43	151.43					9	13.6	11.1	11.3	14.6	10.9	12.3					9	43423.7	31.9292
		10	132.1	150.26	135	143.5	176.58	147.488					10	11.9	11.5	10.7	9.8	11.8	11.14					10	39898.8	29.3374
0,1 µg fulvestrant/g egg	1	1	124.48	155.41	166.01	162.38	194.7	160.596	131.847		10 µg fulvestrant/g egg	1	1	8.7	12.2	9.1	11.1	12.6	10.74	12.674		10 µg fulvestrant/g egg	1	1	54660.8	40.1918	37.6752
		2	246.67	210.25	226.24	218.41	248.63	230.04					2	12.8	13.4	14.2	13.3	14	13.54					2	40866.6	30.049
		3	257.72	182.76	220.14	243.52	229.4	226.708					3	11	10	11.8	9.9	9.7	10.48					3	43080.8	31.6771
		4	98.1	129.47	104.67	96.67	93.48	104.478					4	15	16.5	15.9	14.4	12.2	14.8					4	63656.3	46.8061
		5	117.87	122.93	91.85	89.56	91.69	102.78					5	14	14.5	13.7	15.9	11.8	13.98					5	55346.4	40.6959
		6	117.63	102.07	87.98	77.48	79.7	92.972					6	11.3	9.7	11.3	11.3	9.3	10.58					6	47627.8	35.0204
		7	94.17	79.17	86.86	83.03	64.14	81.474					7	11.8	11	14.1	14.7	10.3	12.38					7	38279.2	28.1465
		8	122.01	125.51	110.11	97.09	83.94	107.732					8	16.3	18	19.4	11.5	15.6	16.16					8	42755.9	31.4382
		9	110.76	119.09	95.67	96.68	93.9	103.22					9	12.7	10.6	13.7	12.5	12.5	12.4					9	63963.5	47.032
		10	107.19	112.73	116.34	101.38	104.73	108.474					10	11.6	13.1	10.9	11.9	10.9	11.68					10	62145.1	45.6949
	2	1	155.36	153.54	159.55	149.54	182.17	160.032	160.545			2	1	15	15.2	12.8	10.4	12.6	13.2	12.802			2	1	41589.5	30.5805	31.3537
		2	126.72	125.91	132.24	138.68	133.69	131.448					2	12.9	14.6	16.1	14.4	14	14.4					2	49358.4	36.2929
		3	112.99	114.17	122.35	122.75	136.01	121.654					3	10.4	12.6	11.1	10.1	15.6	11.96					3	37048.9	27.2418
		4	129.68	130.38	137.91	127.05	155.78	136.16					4	13.1	13.8	11.2	15.7	14	13.56					4	46144.8	33.93
		5	146.38	135.67	123.01	158.01	203.16	153.246					5	12.5	12.5	11	11.6	12.8	12.08					5	43183.9	31.7529
		6	134.85	161.8	215.94	240.54	231.8	196.986					6	11.6	10.7	14.4	12.6	11.6	12.18					6	35047.9	25.7705
		7	163.47	149.03	159.21	163.17	177.53	162.482					7	13.5	14.4	14.1	13.8	13.9	13.94					7	36139.3	26.573
		8	175.84	171.54	182.24	176.31	173.74	175.934					8	14.3	13.8	10.5	13.2	15.1	13.38					8	49449.4	36.3599
		9	195.44	185.64	186.2	194.54	227.42	197.848					9	9.4	14.2	11.2	13.3	11.7	11.96					9	41701.4	30.6628
		10	189.04	148.72	167.01	168.63	174.9	169.66					10	10.7	11.9	11.8	13.7	8.7	11.36					10	46747.3	34.373
	3	1	67.95	118.06	126.17	92.61	91.06	99.17	134.227			3	1	13.1	11	10.9	11.2	15.3	12.3	12.23			3	1	49257.4	36.2187	32.0033
		2	147.96	111.87	75.04	87.24	91.35	102.692					2	13.4	10.7	10.3	13.2	8.4	11.2					2	46082.6	33.8843
		3	96.64	60.83	81.09	76.76	70.14	77.092					3	12.2	11.9	13.1	13.1	10.9	12.24					3	46338	34.0721
		4	103.19	138.63	155.06	140.89	89.75	125.504					4	11.2	14.7	16.5	15	13.4	14.16					4	43351	31.8757
		5	253.39	231.58	173.64	163.22	138.68	192.102					5	14.1	14.5	15.2	15.4	13.7	14.58					5	41275.3	30.3495
		6	151.07	193.91	204.47	259.44	237.02	209.182					6	9.7	10.6	10.9	10.9	12.8	10.98					6	40128.1	29.506
		7	152.03	139.56	164	91.02	115.02	132.326					7	11.2	12.5	12.5	12.3	14.7	12.64					7	31634.7	23.2608
		8	132.45	121.37	107.53	119.07	108.65	117.814					8	12.7	12.4	10.7	9.8	9.8	11.08					8	40307.9	29.6382
		9	117.33	138.39	140.29	153.85	138.69	137.71					9	10.6	13.6	10.5	11.7	10.6	11.4					9	49523.1	36.414
		10	147.91	162.07	129.68	142.29	161.44	148.678					10	11.3	12.9	12.2	10.9	11.3	11.72					10	47346.7	34.8137
	4	1	160.68	164.56	136.79	160.28	126.15	149.692	164.448			4	1	7.4	7.5	8.8	8.7	7.7	8.02	9.41			4	1	39082.6	28.7372	32.9599
		2	152.27	163.13	165.13	173.46	139.41	158.68					2	11.9	10.5	9.9	9.3	7.6	9.84					2	52142.5	38.3401
		3	188.64	139.74	167.38	176.58	163.8	167.228					3	7.3	9.5	6.8	8.4	10.1	8.42					3	39598	29.1162
		4	156.97	151.19	173.47	176.87	147.57	161.214					4	10.8	10.4	6.2	7.9	9.3	8.92					4	37373.1	27.4802
		5	175.56	154	164.73	175.47	174.57	168.866					5	8.2	8.2	5.8	9.1	7.9	7.84					5	51948	38.1971
		6	210.32	163.92	150.13	202.58	160.84	177.558					6	10.4	9.1	9.3	10.1	11.7	10.12					6	39431.9	28.994
		7	179.22	181.22	173.98	183.99	178.8	179.442					7	11.6	13.9	11.3	10.6	11	11.68					7	44981	33.0743
		8	156.7	144.44	187.25	161.29	141.68	158.272					8	11.7	11.8	10.6	11.8	9	10.98					8	47894.5	35.2165
		9	166.44	184.71	158.99	201.99	167.77	175.98					9	9.5	10.9	9.5	11	10.7	10.32					9	44289.4	32.5657
		10	151.03	140.73	182.48	119.31	144.17	147.544					10	8.5	8.5	5.2	8.4	9.2	7.96					10	51513.9	37.8779
	5	1	161.09	160.03	147.51	148.45	219.03	167.222	151.938			5	1	12.2	11.6	9.7	10.3	11.6	11.08	13.57			5	1	50164.2	36.8854	29.9749
		2	151.7	180.38	170.95	185.03	249.42	187.496					2	11.1	12.2	13.3	11.7	11.7	12					2	43389	31.9037
		3	133.34	151.7	135.86	154.67	166.34	148.382					3	13.8	16.5	14.3	13.4	14.1	14.42					3	36430.1	26.7868
		4	131.69	151.85	177.27	133.44	138.82	146.614					4	18	14.3	15	13.8	18.4	15.9					4	40812	30.0088
		5	122.34	121.85	148.57	165.28	140.1	139.628					5	17	15.1	15.2	16.6	17.5	16.28					5	29633.7	21.7895
		6	156.9	166.88	168.45	157.91	166.55	163.338					6	12.5	12.8	13.2	16.2	17.2	14.38					6	41052.4	30.1856
		7	139.67	114.39	160.1	131.73	154.74	140.126					7	12.5	13.7	13.4	12.3	12.9	12.96					7	43181.4	31.751
		8	132.67	129.77	134.27	141.32	143.36	136.278					8	16.2	10.9	18.2	13.3	13.2	14.36					8	42330.1	31.1251
		9	140.39	143.54	133.42	143.1	146.55	141.4					9	12.8	13.8	11.9	11.6	11.6	12.34					9	44695.4	32.8643
		10	150.39	141.19	142.75	146.98	163.15	148.892					10	11	12.2	15.2	8.4	13.1	11.98					10	35970.1	26.4486
	6	1	110.76	134.91	116.22	116.03	164.24	128.432	134.423			6	1	11.9	10	13.4	12.7	13.1	12.22	11.904			6	1	25452.3	18.7149	25.0852
		2	120.88	125.98	119.49	102.16	1110.53	315.808					2	10.6	9.7	9.7	8.7	8.2	9.38					2	36438.8	26.7932
		3	128.7	131.91	119.82	120.51	193.23	138.834					3	10.5	11.3	10.7	12	12.7	11.44					3	38606.2	28.3869
		4	81	124.87	117.32	107.02	102.5	106.542					4	11.1	9.7	11.1	10.9	10.1	10.58					4	38564.1	28.356
		5	131.93	118.08	111.52	90.28	104.09	111.18					5	9.4	12.5	12.8	13.1	9	11.36					5	30191.4	22.1996
		6	113.95	120.67	95.24	69.85	90.14	97.97					6	14.6	14.8	11.9	18.2	14.5	14.8					6	37971.3	27.9201
		7	76.08	126.94	104.5	90.25	103.36	100.226					7	14.8	13.1	12.6	12.4	13	13.18					7	32207.1	23.6817
		8	90.22	112.38	125.53	120.15	93.16	108.288					8	13.2	10.9	8.4	11.4	9.6	10.7					8	30941	22.7507
		9	119.17	114.24	123.92	113.16	106.46	115.39					9	10.1	11.7	9.3	9.3	10.7	10.22					9	28887.6	21.2409
		10	121.22	127.28	130.17	118.98	110.16	121.562					10	17.8	17	15.7	12.4	12.9	15.16					10	41898.5	30.8077
	7	1	161.42	124.48	143.78	116.66	163.74	142.016	164.63			7	1	9	11.4	11.2	11.4	9.7	10.54	10.038			7	1	34727.2	25.5347	29.7476
		2	162.21	129.01	159.27	178.26	153.58	156.466					2	11.5	13.3	11.4	9.2	9.7	11.02					2	37867.7	27.8439
		3	181.94	141.62	141.63	163.61	162.29	158.218					3	11.8	8.7	10	9.4	10.3	10.04					3	35972.4	26.4503
		4	129.66	186.57	168.87	143.64	169.64	159.676					4	10.9	11.9	9.7	12	11.2	11.14					4	40202.8	29.5609
		5	154.66	152.8	161.66	155.38	140.09	152.918					5	11	9.7	12.6	14	12.8	12.02					5	37553.2	27.6126
		6	163.92	172.92	178.42	152.85	174.58	168.538					6	10.3	9.3	11.1	12.2	8.7	10.32					6	43495	31.9816
		7	183.95	159.76	190.3	176.74	193.69	180.888					7	6.7	7.7	7.1	8.8	7.1	7.48					7	49050.4	36.0665
		8	185.32	202.66	186.03	161.72	149.32	177.01					8	10.4	9.7	10.5	10.5	11.3	10.48					8	41419.2	30.4553
		9	182.24	159.13	151.41	149.58	153.5	159.172					9	9	10.8	9.9	6.6	10	9.26					9	37522.5	27.5901
		10	178.06	160.87	223.91	182.91	211.23	191.396					10	9.1	6.7	7.1	10	7.5	8.08					10	46757.4	34.3804
1 µg fulvestrant/g egg	1	1	152.21	151.88	186.4	162.17	175.94	165.72	194.555			8	1	13.4	16.3	13.5	15.1	17.7	15.2	13.53			8	1	54136.1	39.806	25.9917
		2	192.13	173.34	168.59	191.91	180.68	181.33					2	13.1	15.9	12.8	15.3	9.9	13.4					2	36104.9	26.5477
		3	193.61	143.77	212.53	170.88	208.29	185.816					3	13.4	11.8	12.5	15	14.6	13.46					3	37905.3	27.8715
		4	219.25	192.07	197.7	193.98	200.3	200.66					4	14.2	14.1	16.9	14.7	13.5	14.68					4	32187.8	23.6675
		5	198.33	173.01	154.66	160.39	172.5	171.778					5	11.9	13.2	13.6	12.6	10.6	12.38					5	27476.4	20.2032
		6	184.05	211.62	196.23	188.22	195.54	195.132					6	15.9	14.6	18.5	17.7	20.3	17.4					6	25065.5	18.4305
		7	200.94	222.74	199.67	240.93	183.68	209.592					7	10.9	12	10	11.9	9.7	10.9					7	37350	27.4632
		8	216.98	236.29	198.65	201.8	181.42	207.028					8	8.1	7.3	11.9	12.2	13.4	10.58					8	28552	20.9941
		9	196.81	209.55	222.34	204.87	238.34	214.382					9	15.5	12.6	10.6	13.7	15.8	13.64					9	37768.3	27.7708
		10	210	206.09	227.82	209.31	217.35	214.114					10	13.5	13.8	14.3	12.2	14.5	13.66					10	36940.6	27.1622
	2	1	102.08	137.81	178.49	162.76	198.35	155.898	162.846		20 ng EE2/g egg	1	1	10.7	10.4	11	8.6	9.5	10.04	9.644		20 ng EE2/g egg	1	1	36277	26.6743	28.3951
		2	156.75	175.61	181.26	160.84	205.97	176.086					2	8.1	8.8	11.6	10.5	10	9.8					2	36448.2	26.8001
		3	153.37	161.87	163.99	156.85	206.35	168.486					3	7.2	11	10.9	10.3	7.2	9.32					3	36074.7	26.5255
		4	179.55	151.8	207.58	221.93	223.21	196.814					4	10.3	6.9	8.6	8.9	10.7	9.08					4	51189.7	37.6395
		5	199.28	168.37	149.12	205.51	152.43	174.942					5	10.4	10.1	12.5	10.1	9.8	10.58					5	34452.6	25.3328
		6	68.95	154.81	173.17	151.16	172.73	144.164					6	9.1	6.6	6.6	7.4	6.9	7.32					6	45149.7	33.1983
		7	85.3	160.55	105	151.72	183.19	137.152					7	8.6	11.6	9.5	11	9.1	9.96					7	36314.5	26.7018
		8	76.33	78.12	81.67	132.43	147.5	103.21					8	10.8	11.3	10.6	12.2	12.5	11.48					8	36972.2	27.1854
		9	143.95	161.94	181.71	206.18	230.17	184.79					9	10.2	8.1	10.1	10	10.4	9.76					9	38936.2	28.6296
		10	149.5	163.47	191.71	217.37	212.53	186.916					10	10	9.4	7.8	8.9	9.4	9.1					10	34358.9	25.2639
	3	1	109.56	122.6	179.73	181.04	200.22	158.63	160.57			2	1	42.9	42.9	39.5	20.9	30.3	35.3	52.42			2	1	37107.6	27.285	31.4054
		2	129.93	134.49	161.45	196.08	169.78	158.346					2	53	36.8	58.9	33.4	103.2	57.06					2	51748.7	38.0505
		3	139.54	163.13	191.05	214.27	189.17	179.432					3	51.1	37.7	52.7	47.3	38	45.36					3	40345	29.6654
		4	168.79	143.07	183.59	187.65	142.5	165.12					4	55.4	38.4	41.9	74.3	51.7	52.34					4	41229.5	30.3158
		5	152.58	176.44	146.37	186.51	181.53	168.686					5	38.8	58.7	74.1	41.1	35.7	49.68					5	44597	32.7919
		6	128.91	129.39	212.15	192.49	157.11	164.01					6	73.4	42.4	42.2	21.2	40.6	43.96					6	40841.2	30.0303
		7	144.68	191.06	178.06	148.1	106.8	153.74					7	66.6	71	46.3	43.8	34.6	52.46					7	32435.7	23.8498
		8	173.95	177.68	133.36	161.49	137.61	156.818					8	34.3	60.9	83.1	61.1	86.1	65.1					8	46227.3	33.9907
		9	170.07	151.79	156.3	130.98	153.03	152.434					9	54.5	17.8	77.8	73.2	26.2	49.9					9	46808.8	34.4182
		10	176.67	139.77	171.86	145.15	108.98	148.486					10	59.7	109.5	82.1	60.5	53.4	73.04					10	45772.6	33.6563
	4	1	143.25	148.4	128.11	152.77	269.77	168.46	166.641			3	1	10	11.6	15.4	15.1	11	12.62	11.768			3	1	38144.7	28.0476	31.6678
		2	168.85	157.54	142.08	164.58	174.18	161.446					2	11.9	8.8	11.4	12	12.8	11.38					2	44910.4	33.0224
		3	133.88	144.94	169.02	180.19	260.3	177.666					3	11.4	11.6	11.9	14.2	13.3	12.48					3	38411	28.2434
		4	221.29	139.93	130.01	173.46	198.34	172.606					4	11.3	11.2	10.5	10.2	11.8	11					4	40664.9	29.9007
		5	255.45	202.65	134.81	140.57	157.87	178.27					5	13.1	12.2	11	12.1	11.2	11.92					5	52930	38.9191
		6	149.75	155.89	180.02	188.24	255.23	185.826					6	10.1	9.4	10.5	9.4	11.2	10.12					6	42303.7	31.1057
		7	157.42	121.69	129.01	165.02	188.12	152.252					7	14.4	16.1	8.1	11.8	11.2	12.32					7	44842.4	32.9724
		8	155.26	143.04	198.05	205.55	199.1	180.2					8	10.2	10.9	11	10.7	11.5	10.86					8	39941.1	29.3685
		9	172.11	116.78	123.74	129.94	190.15	146.544					9	10.1	14.3	13.2	13.3	12.3	12.64					9	37855.2	27.8347
		10	143.49	143.82	141.37	143.63	143.39	143.14					10	12.3	13.6	10.9	11.8	13.1	12.34					10	50679	37.264
	5	1	118.48	142.78	147.48	149.38	124.33	136.49	116.339			4	1	94.7	126.9	97	89.1	52.8	92.1	106.426			4	1	33720.1	24.7942	21.5655
		2	121.01	160.37	151.67	157.69	96.34	137.416					2	92.9	123.2	88.6	120	63	97.54					2	19286.7	14.1814
		3	121.87	138.59	160.85	147.48	147.32	143.222					3	58.7	64.8	60.9	77.6	49.3	62.26					3	34654.2	25.481
		4	59.89	96.76	96.45	100.09	59.33	82.504					4	157.9	113	113.5	151.4	85.1	124.18					4	24188.7	17.7858
		5	93.58	113.84	108.45	107.73	68.61	98.442					5	37.9	61.3	81.1	103.8	89.2	74.66					5	33385.5	24.5482
		6	102.9	138.43	144.07	136.49	154.67	135.312					6	76.2	124	200.7	82.1	117.4	120.08					6	27756.4	20.4091
		7	59.22	85.54	88.58	96.7	117.26	89.46					7	198.9	106.5	183.7	75.4	195.8	152.06					7	32422.6	23.8401
		8	144.92	148.06	132.04	73.05	98	119.214					8	103.4	147.7	219	85.9	109.9	133.18					8	33911.6	24.935
		9	147.01	74.22	76.05	119.5	68.2	96.996					9	89.5	113	107	116.9	75.4	100.36					9	23939.3	17.6024
		10	129.13	133.44	106.8	122.78	129.51	124.332					10	122.1	106.4	153	111.9	45.8	107.84					10	30026.1	22.078
	6	1	86.67	83.34	104.17	93.04	80.35	89.514	90.9106			5	1	38.5	39.3	43.6	45	40.1	41.3	42.83			5	1	27249	20.036	23.2128
		2	13.48	115	103.42	81.67	81.11	78.936					2	42	70	61.2	38.7	32	48.78					2	22139.7	16.2792
		3	102.77	86.16	82.18	108.04	102.99	96.428					3	94.1	91	82.3	87.6	48.6	80.72					3	20289.5	14.9188
		4	78.34	102.67	99.17	87.24	73.3	88.144					4	42.1	45.9	42.7	31.2	38.3	40.04					4	45858.7	33.7196
		5	59.17	61.81	83.48	106.99	121.57	86.604					5	110.2	75.2	42.9	37.1	29.7	59.02					5	33435.9	24.5852
		6	106.99	93.34	98.91	95.4	86.49	96.226					6	80.9	40.1	42.5	37.3	31	46.36					6	36414.2	26.7751
		7	103.74	102.48	122.32	136.49	124.85	117.976					7	22.4	30.9	22.6	17.9	20.4	22.84					7	29489.5	21.6835
		8	91.76	103.5	100.5	75.76	129.44	100.192					8	30.3	34.2	28.9	28.5	23.2	29.02					8	29420.3	21.6326
		9	77.55	77.3	106.78	78.8	117.21	91.528					9	34.5	32.4	23.6	29.8	26.1	29.28					9	31548.3	23.1973
		10	60.92	60.09	56.59	74.17	66.02	63.558					10	31.2	33.8	28.9	30.7	30.1	30.94					10	39848.4	29.3003
	7	1	138.45	126.12	109.32	102.12	108.09	116.82	128.809		0,1 µg fulvestrant/g egg + 20 ng EE2/g egg	1	1	12.923	14.494	14.006	38.302	49.599	25.8648	32.8242		0,1 µg fulvestrant/g egg + 20 ng EE2/g egg	1	1	32115.7	23.6145	25.7599
		2	161.34	125.97	120.38	119.63	98.43	125.15					2	7.277	7.5	7.928	134.167	142.086	59.7916					2	34915.2	25.6729
		3	124.11	122.29	127.98	112.8	120.38	121.512					3	95.975	79.849	14.099	16.078	14.464	44.093					3	32293.2	23.745
		4	97.54	130.61	112.92	82.9	79.8	100.754					4	14.173	14.392	14.655	18.276	80.162	28.3316					4	25941.2	19.0744
		5	200.75	169.42	153.05	132.84	116.67	154.546					5	70.25	68.577	12.112	6.719	4.877	32.507					5	36049	26.5066
		6	132.62	116.62	109.25	83.11	100.97	108.514					6	60.292	3.75	6.588	34.359	53.865	31.7708					6	49950.9	36.7286
		7	148.07	108.02	116.05	121.05	114.86	121.61					7	16.094	13.463	56.091	61.154	9.1	31.1804					7	25742.4	18.9282
		8	160	138.33	137.15	163.41	205.71	160.92					8	8.09	4.507	6.783	6.783	6.588	6.5502					8	44437.6	32.6747
		9	217.17	170.06	154.13	119.19	99.56	152.022					9	48.764	39.308	60.467	5.667	4.29	31.6992					9	34437.9	25.322
		10	175.96	130.38	109.67	107.01	108.17	126.238					10	72.361	52.588	47.553	4.429	5.336	36.4534					10	34451.8	25.3322
	8	1	155.25	159.67	163.72	134.43	100.2	142.654	142.675			2	1	11	10.4	9.2	12.9	9.4	10.58	11.24			2	1	38919.4	28.6172	28.2676
		2	166.1	172.85	163.31	114.7	133.23	150.038					2	13	14.3	13.8	15	16.3	14.48					2	33945.8	24.9601
		3	169.23	182.1	171.29	155.39	127.87	161.176					3	13.1	12.6	11.5	13	10.7	12.18					3	35259.4	25.926
		4	121.19	101.11	114.9	116.84	128.06	116.42					4	8.5	10.7	9.5	10.6	12	10.26					4	43580.3	32.0443
		5	170.25	113.85	119.07	114.49	119.91	127.514					5	12.5	10.2	10.3	14.2	13.7	12.18					5	40199.1	29.5582
		6	123.21	122.07	113.29	94.38	122.91	115.172					6	10.6	10.3	10.7	12.6	10.2	10.88					6	41837.9	30.7632
		7	209.23	203.73	145	138.27	108.76	160.998					7	11.2	11.9	10	14	11.6	11.74					7	38586.3	28.3723
		8	193.01	153.12	131.93	113.34	151.72	148.624					8	10	9.7	11	8.1	11.5	10.06					8	36966.4	27.1812
		9	144.77	140.37	136.17	147.99	124.97	138.854					9	9	9	9.1	8.4	8.1	8.72					9	35919.1	26.4111
		10	202.08	159.1	152.79	146.69	165.82	165.296					10	11.8	11.5	10.1	11.5	11.7	11.32					10	39226.3	28.8429
10 µg fulvestrant/g egg	1	1	214.75	182.36	175.05	144.55	126.27	168.596	144.513			3	1	11.5	11.4	10.5	11.9	13.5	11.76	12.414			3	1	27163	19.9728	24.9634
		2	217.03	184.09	116.91	127.04	73.39	143.692					2	11.1	10.6	10.7	10.3	10.3	10.6					2	24947.2	18.3435
		3	215.83	210.11	195.86	183.53	144.23	189.912					3	11.9	13.8	11.1	13.4	13.9	12.82					3	27436.3	20.1737
		4	227.71	203.01	154.84	171.59	155	182.43					4	13.8	15.9	12.5	11.4	13.2	13.36					4	33684.3	24.7679
		5	170.88	151.78	131.73	146.67	151.85	150.582					5	13.1	12	12.7	16	13.6	13.48					5	31204.1	22.9442
		6	125.04	110.32	130.26	117.64	158.65	128.382					6	11.3	15.1	13.2	13.7	12.3	13.12					6	35014.5	25.746
		7	203.34	184.32	113.02	80.25	84.27	133.04					7	11.1	10.9	11	11.8	10.6	11.08					7	39908.3	29.3443
		8	152.77	95.96	117.92	100.01	124.17	118.166					8	11.9	10.4	11.6	13.5	13.5	12.18					8	43176.6	31.7475
		9	99.34	83.54	69.89	84.39	71.79	81.79					9	12.8	13.1	14.8	11.1	11.4	12.64					9	31271.3	22.9936
		10	203.53	177.81	171.77	103.61	85.97	148.538					10	12.3	13.1	15.9	11.9	12.3	13.1					10	45696.6	33.6004
	2	1	138.21	134.85	194.62	203.34	181.04	170.412	174.63			4	1	7.66	4.104	55.117	57.975	146.805	54.3322	53.6675			4	1	33779.9	24.8382	26.6827
		2	172	179.73	190.51	219	186.16	189.48					2	57.194	52.202	100.514	75.104	83.202	73.6432					2	47841.6	35.1776
		3	158.59	201.4	184.94	254.24	116.34	183.102					3	60.533	8.218	5.48	50.69	81.957	41.3756					3	36572.6	26.8916
		4	152.25	129.64	202.24	164.41	177.91	165.29					4	3.75	4.602	5	52.877	59.817	25.2092					4	35015.7	25.7468
		5	198.8	168.5	175.72	213.24	213.05	193.862					5	7.906	10.308	9.52	55.877	67.65	30.2522					5	32698.6	24.0431
		6	182.26	190.46	186.35	207.73	187.5	190.86					6	8.59	102.168	85.151	9.167	7.132	42.4416					6	25577.2	18.8068
		7	202.14	135.28	156.4	239.36	241.96	195.028					7	132.754	124.628	5	64.664	76.203	80.6498					7	36500.5	26.8386
		8	107.41	108.53	134.69	162.13	243.87	151.326					8	19.939	54.712	44.326	55.473	6.25	36.14					8	33404.7	24.5623
		9	90.05	82.23	223.1	235.55	157.89	157.764					9	64.215	138.79	156.286	130.459	108.449	119.64					9	33618.7	24.7196
		10	150.08	113.58	167.75	142.66	171.8	149.174					10	8.975	56.41	37.864	10.308	51.399	32.9912					10	47875.3	35.2024
	3	1	137.68	169.24	135.36	122.48	133.36	139.624	123.609			5	1	14.1	15.2	15.8	23.3	17.4	17.16	14.782			5	1	21107.7	15.5204	26.2594
		2	142.19	154.62	131.29	150.2	136.46	142.952					2	13.6	10.4	11.5	13.1	12.8	12.28					2	38261.5	28.1335
		3	130.24	141.93	137.48	122.8	133.46	133.182					3	16.2	14.7	17	12.6	13.1	14.72					3	39369.7	28.9483
		4	143.71	121.91	114.41	170.65	222.5	154.636					4	14.8	13.3	11.9	13.1	13.4	13.3					4	40020.6	29.4269
		5	133.44	106.93	115.43	97.5	127.52	116.164					5	15	17.2	17.8	15.9	17.8	16.74					5	36958.6	27.1754
		6	113.19	115.38	108.02	110.15	83.54	106.056					6	15	13.4	13.8	11.9	13.8	13.58					6	38537.1	28.3361
		7	112.34	85.35	88.53	117.63	106.46	102.062					7	15	20.2	16.1	15.9	14.9	16.42					7	29915.4	21.9966
		8	98.83	96.41	81.82	126.67	202.99	121.344					8	15.3	10	13.7	18.1	15.8	14.58					8	38976.9	28.6595
		9	92.68	114.41	126.72	116.87	110.16	112.168					9	14.9	16.6	14.2	13.8	15.7	15.04					9	38575	28.364
		10	99.74	103.94	109.66	107.55	118.61	107.9					10	15.6	12.5	14	15	12.9	14					10	35405.5	26.0335
	4	1	128.29	154.66	127.5	128.08	139.41	135.588	142.949		1 µg fulvestrant/g egg + 20 ng EE2/g egg	1	1	147.9	120.5	101.5	104.2	71.5	109.12	114.556		1 µg fulvestrant/g egg + 20 ng EE2/g egg	1	1	25408.6	18.6828	21.3176
		2	144.96	149.98	143.12	133.05	145.83	143.388					2	148.4	125.4	114.4	104.7	105.2	119.62					2	30430.1	22.3751
		3	141.6	151.1	141.63	116.09	149.16	139.916					3	204.1	171.3	121.1	110.8	102.2	141.9					3	17671.1	12.9935
		4	147.74	151.33	148.81	143.77	140.1	146.35					4	280.4	200.2	156.7	112.8	80.1	166.04					4	28125.9	20.6808
		5	153	146.81	156.55	170.51	139.78	153.33					5	163	271.4	247.5	106.9	78.8	173.52					5	32374.2	23.8046
		6	155.83	121.25	103.78	150.67	143.78	135.062					6	102.6	62.1	116.3	147.9	117.6	109.3					6	35704.4	26.2532
		7	170.91	165.94	104.89	92.8	151.53	137.214					7	159.2	84.6	69.4	62.7	94.4	94.06					7	29221.7	21.4865
		8	146.78	101.79	123.01	141.25	134.67	129.5					8	177.6	104.1	102.9	79.2	77.3	108.22					8	24010.2	17.6546
		9	178.09	187.09	174.22	130.31	112.71	156.484					9	43	32.7	49.1	44.2	32.4	40.28					9	30433.4	22.3775
		10	195.85	161.31	180.31	106.72	119.12	152.662					10	122.7	79.2	85.1	84.5	46	83.5					10	36539.5	26.8673
	5	1	128.66	158.37	134.95	152.4	179.45	150.766	161.714			2	1	11	5.6	8.2	7.4	14	9.24	9.426			2	1	36175.7	26.5998	27.3697
		2	125.86	120.86	134.69	160.04	149.39	138.168					2	9.7	10	8.7	9.7	9.3	9.48					2	37371.6	27.4791
		3	151.38	149.07	119.59	143.09	174.58	147.542					3	8	11.5	11.3	11.4	9.3	10.3					3	29769.1	21.889
		4	157.5	129.38	117.97	161.13	194.45	152.086					4	9.1	9.1	11.2	9.6	10.6	9.92					4	30422.8	22.3697
		5	144.01	124.97	161.57	216.41	225.75	174.542					5	8	11.2	9.8	9.1	11.7	9.96					5	28632.1	21.053
		6	163.44	141.67	146.68	144.53	177.72	154.808					6	9.9	8.6	11	6.2	8.7	8.88					6	51010.1	37.5074
		7	143.63	143.72	159.34	207.01	212.26	173.192					7	8	7.8	7.5	10.3	8.7	8.46					7	32182	23.6632
		8	160.03	147.43	144.96	173.08	198.35	164.77					8	9.3	8	8.9	10.4	10.5	9.42					8	47337	34.8066
		9	183.42	152.33	153.01	184.95	195.9	173.922					9	9	10.8	7.9	8.8	11.2	9.54					9	44048.4	32.3885
		10	179.2	195.8	179.49	206.65	175.6	187.348					10	9.4	7.8	7.7	10.6	9.8	9.06					10	35278.8	25.9403
20 ng EE2/g egg	1	1	97	122.28	91.34	96.43	101.03	101.616	133.717			3	1	36.4	41.7	30.2	43.3	38.2	37.96	55.336			3	1	21862.1	16.0751	21.5483
		2	144.98	123.05	118.41	110.34	134.56	126.268					2	52.4	53.2	51.8	57.1	65.2	55.94					2	31353.3	23.0539
		3	151.8	120.58	125.26	123.87	115.67	127.436					3	43	56.4	56.9	58.7	43	51.6					3	23494.3	17.2752
		4	151.5	159.15	128.07	153.66	158.49	150.174					4	70.6	45.2	8.4	56.7	37.8	43.74					4	29365.3	21.5921
		5	114.83	140.06	118.23	118.48	141.92	126.704					5	69.1	65.4	56.2	15	54.7	52.08					5	34136.1	25.1001
		6	159.7	164.5	159.98	131.93	118.85	146.992					6	70.1	66.7	70.6	49.9	51.6	61.78					6	32186.3	23.6664
		7	118.7	155.1	162.07	167.89	117.87	144.326					7	68.7	56.6	91.6	74.5	43	66.88					7	33016.6	24.2769
		8	138.29	154.84	142.58	127.09	113.47	135.254					8	82.6	83.6	85.7	66.1	60.9	75.78					8	33587.6	24.6968
		9	167.71	153.72	161.14	134.17	91.69	141.686					9	47.5	13.2	9.4	39.7	37.6	29.48					9	28871.1	21.2288
		10	170.55	159.19	154.84	106	93.01	136.718					10	90.7	90.2	76.8	76.2	56.7	78.12					10	25184.4	18.5179
	2	1	181.85	174.56	188.8	158.85	145.09	169.83	151.506			4	1	10	11.2	12.9	15.7	11.2	12.2	11.104			4	1	28143.1	20.6935	24.0364
		2	167.35	167.15	174.49	189.67	172.63	174.258					2	7.9	10.6	11.6	9.7	10.3	10.02					2	33498.6	24.6313
		3	165.25	213.45	208.95	198.34	182.76	193.75					3	10.7	13.3	10.8	11.6	9.2	11.12					3	25565.8	18.7984
		4	165.36	152.5	138.64	146.68	136.02	147.84					4	10	12.2	11.9	10.6	9.3	10.8					4	22603.7	16.6204
		5	148.06	162.6	187.03	156.85	137.52	158.412					5	9.7	12.4	10.6	11.5	12.4	11.32					5	29389.6	21.61
		6	157.84	165.5	165.3	153.37	156.75	159.752					6	10.6	9.7	9.7	8.4	11.3	9.94					6	40398	29.7044
		7	164.27	128.55	132.59	125	102.5	130.582					7	7.2	12.4	7.1	12.4	9.8	9.78					7	46314.3	34.0546
		8	136.04	93.34	112.58	95.06	94	106.204					8	13	11.7	11.8	10.7	11.1	11.66					8	33579.7	24.691
		9	168.18	119.5	105.27	110.62	133.26	127.366					9	13.3	12.3	12.8	8.7	10.9	11.6					9	32309.7	23.7571
		10	116.2	155.25	191.7	136.63	135.53	147.062					10	15	14.4	9.5	14.9	9.2	12.6					10	35092.1	25.803
	3	1	187.41	167.28	147.78	126.24	148.27	155.396	139.562		10 µg fulvestrant/g egg + 20 ng EE2/g egg	1	1	12.6	13.5	13	13.5	12.7	13.06	10.828		10 µg fulvestrant/g egg + 20 ng EE2/g egg	1	1	41045.1	30.1802	29.4132
		2	122.93	126.83	103.74	100.73	71.3	105.106					2	11.9	9.9	9.4	9.6	15.2	11.2					2	40066.9	29.461
		3	100.73	114.92	124.35	111.56	137.45	117.802					3	10.7	12.3	10.1	11.2	10.5	10.96					3	37176.1	27.3354
		4	120.58	142.84	146.81	137.79	154.53	140.51					4	10.7	13.9	11.5	10.3	11.5	11.58					4	40505.8	29.7837
		5	154.46	149.77	145.27	142.4	152.19	148.818					5	11.9	12.7	9.3	12.2	11	11.42					5	40734.4	29.9518
		6	149.54	145.61	158.33	121.43	116.26	138.234					6	10	10.4	11.9	9.2	11	10.5					6	37362.6	27.4725
		7	159.51	165.94	169.27	165.8	158.76	163.856					7	9.9	9.4	10.5	7.9	10	9.54					7	34333.6	25.2453
		8	169.41	157.28	173.5	154.34	152.68	161.442					8	7.2	9.7	9.2	9.3	9.4	8.96					8	47711.6	35.0821
		9	183.31	128.03	126.7	112.19	73.08	124.662					9	11.1	9.7	12	11.2	9.4	10.68					9	44694.8	32.8638
		10	143.53	115.33	165.36	148.51	126.23	139.792					10	10.1	10.8	10.7	13.5	6.8	10.38					10	36389.2	26.7568
	4	1	196.74	187.5	151.22	141.67	105.03	156.432	135.105			2	1	10.6	10	10.4	9.1	8.3	9.68	9.658			2	1	46541.2	34.2215	35.0105
		2	146.82	130.83	132.34	111.54	109.34	126.174					2	10	9	10	8.1	9.4	9.3					2	43566.7	32.0343
		3	90.22	122.49	137.32	211.9	234.29	159.244					3	14	14.7	12.7	11.2	13.4	13.2					3	41599.2	30.5876
		4	144.21	157.74	171.68	167.27	107.71	149.722					4	9.9	7.7	7.6	10.3	10.7	9.24					4	43086	31.6809
		5	107.71	133.69	98.39	134.18	150.02	124.798					5	8.1	8.4	9.4	8.7	10.4	9					5	40852.3	30.0385
		6	117.44	110.23	131.69	132.94	134.95	125.45					6	8.1	7.3	8.7	8.5	6.1	7.74					6	45690.6	33.596
		7	130.02	123.52	137.33	139.2	177.7	141.554					7	10.1	10.6	12.2	13.7	12.3	11.78					7	51927.3	38.1818
		8	119.59	116.81	155	132.59	112.46	127.29					8	11.1	10.6	13.4	10.7	10.6	11.28					8	54222.9	39.8698
		9	112.04	107.01	101.77	131.8	122.64	115.052					9	6.9	7.4	8.3	8.1	7.8	7.7					9	48722.3	35.8252
		10	118.85	112.9	122.15	150.45	122.34	125.338					10	8	7.8	8.9	6.6	7	7.66					10	59934.4	44.0694
	5	1	179.36	115.19	90.47	158.83	170	142.77	113.651			3	1	10.7	10.2	12	11.7	12.7	11.46	10.266			3	1	34636.1	25.4677	30.2623
		2	130.88	150.02	140	125	111.92	131.564					2	7.2	8.1	7.8	9.1	9	8.24					2	44721.3	32.8833
		3	123.36	116.74	120.23	106.1	96.84	112.654					3	11.1	9.9	8.1	12.6	9.7	10.28					3	49080.9	36.0889
		4	115.71	139.73	127.28	128.03	114.94	125.138					4	9	10.3	11.2	10.8	9.1	10.08					4	40880.3	30.059
		5	122.28	109.42	106.23	101.41	96.96	107.26					5	10.5	7.3	8.7	10.2	9.9	9.32					5	41569	30.5654
		6	106.74	94.41	117.51	118.63	121.81	111.82					6	10.3	9.7	14	12.5	11.2	11.54					6	42487.1	31.2405
		7	101.89	155.01	155.38	105.95	107.72	125.19					7	8.5	8.3	8.7	9.9	10.1	9.1					7	39667	29.1669
		8	91.99	80.7	101.46	109.78	126.27	102.04					8	9.9	10.9	11	10.6	9.4	10.36					8	41008.4	30.1532
		9	75.95	75.43	88.29	95.2	123.43	91.66					9	11.2	10.3	11.2	11	11	10.94					9	43473.8	31.966
		10	79.1	86.9	104.33	78.22	83.54	86.418					10	11.5	11.8	12.1	10	11.3	11.34					10	34043.9	25.0323
	6	1	127.13	128.11	122.68	127.57	100.89	121.276	111.246			4	1	9.7	10.3	9.4	11	10.2	10.12	9.6			4	1	40542	29.8103	28.7712
		2	117.45	134.22	129.06	114.99	106.99	120.542					2	8.9	9.6	9.6	8.1	7.8	8.8					2	36962	27.1779
		3	117.15	114.24	126.18	123.39	107.14	117.62					3	9.4	10.7	12	11	11.3	10.88					3	43423.3	31.9289
		4	111.29	114.41	76.39	122.22	126.11	110.084					4	10.1	10.1	12.3	8.1	9.5	10.02					4	38464.5	28.2827
		5	90.19	67.11	102.69	104.8	101.51	93.26					5	10.4	8.4	7.8	9.6	8.3	8.9					5	37748.9	27.7565
		6	84.18	88.33	109.22	130.22	132.52	108.894					6	10.7	8.7	10	7.5	8.8	9.14					6	33027.1	24.2846
		7	92.3	93.37	104.5	115.26	121.04	105.294					7	8.8	10	10.7	11.8	8.6	9.98					7	44566.3	32.7693
		8	117.5	122.08	80.16	103.67	150.52	114.786					8	10.1	8.5	9.7	10	8.2	9.3					8	43966.9	32.3286
		9	80.73	108.04	148.45	88.39	99.38	104.998					9	9.3	8.4	8.5	10.1	7.5	8.76					9	31486.4	23.1518
		10	102.84	90.76	122.34	143.72	118.85	115.702					10	9.8	9.9	11.4	10.3	9.1	10.1					10	41101.5	30.2217
	7	1	139.97	118.32	129.66	142.91	170.62	140.296	143.418			5	1	10.3	12.3	9	10	9.5	10.22	11.782			5	1	38549.7	28.3454	33.3787
		2	110.34	116.49	134.97	180.9	182.3	145					2	14	15.1	11.3	11.2	16.8	13.68					2	49926	36.7103
		3	171.38	115.26	146.73	177.17	210.35	164.178					3	10	10.9	11.9	11.8	12.7	11.46					3	46883.1	34.4729
		4	153.66	130.79	133.08	100.41	160.18	135.624					4	6.5	8.6	9.4	11.5	9.2	9.04					4	38743.4	28.4878
		5	121.05	133.51	126.07	101.8	127.69	122.024					5	12.1	11.2	15.2	12	12.1	12.52					5	44079	32.411
		6	147.31	100.41	107.12	108.49	73.35	107.336					6	10.4	13.1	12.5	10.4	12.2	11.72					6	43653.7	32.0983
		7	147.05	155.98	107.89	115.77	104.62	126.262					7	11.1	12.9	10.6	13.8	9	11.48					7	47418.9	34.8668
		8	100.96	114.11	104.01	101.35	79.7	100.026					8	11	12.2	12	12.4	10.8	11.68					8	52144.4	38.3415
		9	1001.62	122.03	140.55	120.21	97.54	296.39					9	12.7	14.7	13.2	12.5	13.2	13.26					9	44495.3	32.7171
		10	103.29	99.14	93.68	78.62	110.51	97.048					10	11.9	11.8	11.9	12.3	15.9	12.76					10	48057.1	35.3361
0,1 µg fulvestrant/g egg + 20 ng EE2/g egg	1	1	210.25	244.55	172.65	173.84	127	185.658	204.079
		2	254.69	238.36	264.21	293.38	234.15	256.958
		3	202.71	100.54	128.48	125.55	90.25	129.506
		4	306.34	274.87	220.67	174.52	251.23	245.526
		5	223.52	254.25	155.26	227	176.85	207.376
		6	268.59	242.49	205.82	273.52	272.75	252.634
		7	192.31	245.2	224.13	176.32	158.56	199.304
		8	228.1	189.89	185.59	223.79	228.87	211.248
		9	221.37	221.02	200.92	175.98	150.25	193.908
		10	149.71	188.8	165.71	142.78	146.37	158.674
	2	1	147.14	148.11	146.55	170.49	152.07	152.872	151.335
		2	171	133.54	157.51	162.7	159.1	156.77
		3	118.18	95.03	93.68	70.26	105.49	96.528
		4	138.66	165.41	165.27	168.98	169.03	161.47
		5	123.43	101.92	130.13	98.05	92.84	109.274
		6	177.2	174.19	163.95	171.09	160.52	169.39
		7	190.31	235.25	223.25	176.12	202.56	205.498
		8	199.7	171.83	155.11	181.94	206.52	183.02
		9	152.32	124.84	115.93	112.18	123	125.654
		10	147.14	148.11	146.55	170.49	152.07	152.872
	3	1	149.03	172.77	197.44	190.92	186.44	179.32	167.088
		2	149.71	175.37	190.44	209.79	198.68	184.798
		3	148.1	190.33	199.8	222.89	201.51	192.526
		4	162.13	132.58	166.94	154.39	94	142.008
		5	148.33	199.78	129.37	155.94	192.37	165.158
		6	132.52	122.93	148.33	135.66	163.91	140.67
		7	218.84	150.96	149.9	134.37	157.73	162.36
		8	230.96	163.52	169.45	142.22	150.56	171.342
		9	225.53	180.53	95.52	175.93	162.49	168
		10	234.44	159.31	152.87	140.06	136.81	164.698
	4	1	144.73	146.68	133.55	131.95	154.5	142.282	146.536
		2	152.32	123.49	166.1	141.82	163.23	149.392
		3	128.35	189.51	121.64	163.28	156.27	151.81
		4	158.49	116.74	142.3	140.11	173.27	146.182
		5	150.21	150.02	142.58	133.11	156.29	146.442
		6	145.74	105.04	155	149.74	161.63	143.43
		7	116.72	130.07	138.27	112.66	126.52	124.848
		8	121.82	100.96	153.66	186.58	163.8	145.364
		9	115.98	107.28	134.67	179.73	185.44	144.62
		10	89.64	87.96	138.81	169.72	368.84	170.994
	5	1	183.34	173.03	141.63	144	146.61	157.722	145.097
		2	205.89	137.59	105.56	153.34	119.35	144.346
		3	215.01	334.29	131.73	148.34	105.12	186.898
		4	175.95	111	96.45	148.78	96.76	125.788
		5	180	126.71	139.42	116.68	75.95	127.752
		6	215.01	145.19	109.18	152.18	110.86	146.484
		7	130.88	128.51	166.74	94.26	148.34	133.746
		8	143.45	146.73	161.72	170.84	111.69	146.886
		9	150.15	155.81	150.02	113.03	152.65	144.332
		10	153.58	132.26	141.73	131.68	125.84	137.018
	6	1	217.12	127.72	154.83	121.39	135	151.212	156.362
		2	136.39	127.82	113.51	129.51	176.02	136.65
		3	167.41	153.12	140.26	167.37	132.44	152.12
		4	129.63	146.48	166.17	172.94	141.92	151.428
		5	170.48	140.84	150.95	167.4	158.12	157.558
		6	148.16	118.45	184.85	179.32	146.68	155.492
		7	187.36	149.07	144.47	168.69	176.8	165.278
		8	165.77	126.77	164.52	152.79	110	143.97
		9	225.06	198.6	153	155.16	181.65	182.694
		10	213.36	148.45	169.22	137.68	167.39	167.22
1 µg fulvestrant/g egg + 20 ng EE2/g egg	1	1	122.78	135.66	165.84	145.24	199.56	153.816	131.081
		2	136.79	169.17	156.62	108.54	68.09	127.842
		3	86.62	122.28	93.52	103.36	98.65	100.886
		4	111.63	87.44	78.44	100.87	88.04	93.284
		5	90.94	70.5	64.56	68.28	84.82	75.82
		6	193.81	171.55	170.33	153.72	177.75	173.432
		7	200.77	176.62	140.64	132.04	180.05	166.024
		8	99.07	107.74	134.21	118.26	138.25	119.506
		9	161.88	192.92	202.18	162	164.2	176.636
		10	118.51	134.63	123.44	123.36	117.87	123.562
	2	1	123.16	117.59	126.77	174.46	133.82	135.16	128.213
		2	120.67	138.43	152.05	165.76	164.83	148.348
		3	194.27	165.94	118.89	89.6	181.67	150.074
		4	163.11	139.54	110.74	116.1	143.11	134.52
		5	132	114.98	121.85	117.9	142.45	125.836
		6	107.56	153	108.79	100.89	77.21	109.49
		7	141.68	129.76	112.35	113.67	108.22	121.136
		8	115.2	151.12	110.76	122.35	125.51	124.988
		9	106.51	104.17	134.99	131.09	165.73	128.498
		10	107.67	110.88	107.85	106.12	87.9	104.084
	3	1	185.51	196.86	159.51	193.92	177.45	182.65	131.933
		2	150.58	123.52	119.86	100.35	99.98	118.858
		3	96.61	73.17	64.33	78.64	92.29	81.008
		4	231.38	216.09	181.55	160.08	125.19	182.858
		5	154.47	166.77	164.81	153.61	126.86	153.304
		6	110.65	105.48	90.47	105.24	90.39	100.446
		7	124.42	133.79	105.86	122.65	114.04	120.152
		8	118.57	123.36	102.57	131.79	115.5	118.358
		9	113.85	165.25	158.49	112.28	99.5	129.874
		10	160.65	145.54	161.45	90.83	100.62	131.818
	4	1	171.61	137.3	166.54	201.68	176.32	170.69	181.298
		2	164.88	160.65	153.63	145.91	160.42	157.098
		3	161.28	148.16	167.52	200.87	208.27	177.22
		4	177.82	164.77	179.89	163.88	174.79	172.23
		5	153.5	167.07	206.12	177.99	144.72	169.88
		6	187.71	234.91	201.85	146.18	165.94	187.318
		7	220.84	215.85	248.02	221.12	167.96	214.758
		8	236.89	207.58	174.49	133.34	161.09	182.678
		9	263.4	200.17	180.86	189.53	170.46	200.884
		10	251.15	187.97	155.23	169.45	137.31	180.222
	5	1	166.52	152.07	151.38	192.24	208.2	174.082	206.976
		2	163.63	168.98	173.45	195.15	210.11	182.264
		3	167.78	175.96	201.51	2033.54	185.91	552.94
		4	143.11	124.5	180.93	197.67	189.17	167.076
		5	155.87	144.35	169.22	196.96	215.2	176.32
		6	160.87	143.49	188.53	186.66	202.5	176.41
		7	131.29	147.4	185.57	200.84	135.58	160.136
		8	176.67	167.33	178.3	180.44	176.74	175.896
		9	142.62	137.99	139.47	167.47	156.04	148.718
		10	148.62	152.5	164.75	161.8	151.9	155.914
	6	1	160.23	142.05	135.87	131.86	173.03	148.608	128.146
		2	110.84	134.91	126.77	172.41	172.41	143.468
		3	96.8	142.85	143.9	149.91	150.98	136.888
		4	132.23	137.26	155.68	136.84	189.96	150.394
		5	85.97	83.89	154.42	159.24	145.81	125.866
		6	84.96	114.05	106.16	88.85	78.87	94.578
		7	117.82	106.48	104.76	121.57	165.34	123.194
		8	154.15	138.12	155.25	158.47	160.78	153.354
		9	146.63	125.44	89.14	89.33	94.3	108.968
		10	121.91	118.7	90.78	77.64	71.66	96.138
	7	1	73.79	95.93	104.31	133.44	121.57	105.808	90.6614
		2	88.35	79.18	112.53	133.36	86.99	100.082
		3	99.88	90.85	80.97	83.85	80.73	87.256
		4	83.81	105.87	87.79	73.53	79.32	86.064
		5	86.45	72.58	108.79	103.89	93.02	92.946
		6	98.56	84.08	86.44	78.3	87.23	86.922
		7	81.55	96.27	86.14	77.84	96.27	87.614
		8	80.25	81.98	82.07	101.67	85.33	86.26
		9	76.6	81.5	67.79	88	82.89	79.356
		10	106.23	103.67	81.82	79.64	100.17	94.306
	8	1	228.73	220.83	202.66	173.66	214.81	208.138	201.413
		2	225.17	262.49	236.65	201.47	262.61	237.678
		3	213.65	215.71	191.14	245.78	151.02	203.46
		4	257.73	151.44	197.66	207.44	230.01	208.856
		5	211.9	163	215.67	200.02	217.86	201.69
		6	218.03	131.06	131.89	176.4	242.91	180.058
		7	213.05	204.15	164.42	198.89	260.99	208.3
		8	195.16	210.6	254.98	178.36	226.72	213.164
		9	165.91	152.5	160.87	211.8	183.04	174.824
		10	165.41	182.48	151.5	170.4	220.03	177.964
	9	1	123.52	112.11	90.57	107.91	104.3	107.682	132.339
		2	163.31	152.14	147.57	107.38	118.7	137.82
		3	161.97	158.24	156.6	144.31	129.27	150.078
		4	161.57	147.57	132.1	127.2	116.74	137.036
		5	134.93	158.09	143.67	156.64	143.3	147.326
		6	127.64	155.68	143.36	133.38	123.88	136.788
		7	146.26	114.92	130.71	123.38	97.06	122.466
		8	194.64	121.57	123.52	122.55	113.14	135.084
		9	190.98	157.94	112.62	99.38	61.75	124.534
		10	184.49	141.21	113.59	95.92	87.66	124.574
	10	1	185.44	205.29	223.3	229.95	224.73	213.742	185.148
		2	247.84	208.13	222.13	230.08	190.27	219.69
		3	273.58	306.42	216.06	167.99	174.74	227.758
		4	233.5	176.31	153.25	235.3	281.75	216.022
		5	212.63	184.39	205.2	228.61	208.63	207.892
		6	235.1	178.7	164.88	109.18	124.2	162.412
		7	213.04	132.45	145.06	138.17	176.83	161.11
		8	190.94	145.39	124.35	142.77	138.67	148.424
		9	214.9	172	139.54	130.33	158.13	162.98
		10	152.93	161.81	120.01	107.71	114.81	131.454
	11	1	64.83	85.54	75.76	107.85	104.14	87.624	87.2802
		2	74.2	71.93	93.74	98.46	90.06	85.678
		3	74.33	65.85	62.21	65.85	85.49	70.746
		4	108.02	119.06	121.39	144.32	136.63	125.884
		5	59.63	63.19	82.18	121.91	121.87	89.756
		6	55.4	77.21	67.46	61.33	58.36	63.952
		7	66.46	84.96	85.74	104.42	95.05	87.326
		8	82.67	95.05	98.52	83.34	64.04	84.724
		9	81.5	82.53	92.38	83.82	64.95	81.036
		10	67.49	99.51	101.04	102.69	109.65	96.076
	12	1	252.55	252.63	274.9	203.53	196.77	236.076	158.239
		2	145.77	177.42	169.46	171.61	155.5	163.952
		3	155.27	142.7	130.6	130.58	115.86	135.002
		4	177.94	183.94	189.8	182.69	166.59	180.192
		5	159.47	153.41	113.29	149.6	169.23	149
		6	186.38	108.56	136.24	148.51	180.26	151.99
		7	140.55	147.05	147.63	161.01	130.22	145.292
		8	110.54	90.68	150.08	112.52	117.12	116.188
		9	144.71	114.94	109.2	128.6	129.71	125.432
		10	211.45	201.13	170.17	152.58	161.01	179.268
	13	1	151.38	170.25	140	149.36	109.62	144.122	126.924
		2	127.54	153.72	148.33	136.92	117.53	136.808
		3	183.95	175.51	129.26	128.17	138.11	151
		4	170.9	148.38	126.27	110.58	113.48	133.922
		5	207.39	156.48	144.72	123.49	101.82	146.78
		6	173.64	119.97	111.27	90.78	110.18	121.168
		7	152.49	115.51	151.22	101	105.12	125.068
		8	135.97	108.68	129.27	102.5	107.13	116.71
		9	116.99	101.06	108.09	117.85	79.18	104.634
		10	91.02	91.68	105.92	68.12	88.42	89.032
	14	1	144.01	130.89	151.23	154.34	147.43	145.58	156.522
		2	225.86	129.85	135.45	158.5	125.59	155.05
		3	120.91	124.18	91.47	145.92	130.07	122.51
		4	134	153.92	165.07	145.33	151.12	149.888
		5	118.16	171.21	193.84	155.48	158.2	159.378
		6	159.72	160.31	150.64	175.1	108.21	150.796
		7	157.43	171.08	179.17	217.88	227.68	190.648
		8	153.72	133.87	182.22	195.16	181.42	169.278
		9	148.53	149.36	188.65	188.02	227.86	180.484
		10	132.8	136.4	145.55	141.05	152.25	141.61
10 µg fulvestrant/g egg + 20 ng EE2/g egg	1	1	165.4	181.4	259.38	265.19	246.72	223.618	149.351
		2	133.43	149.45	180.84	180.56	136.68	156.192
		3	124.91	99.89	134.15	130.5	114.47	120.784
		4	170.87	166.27	133.48	166.22	194.55	166.278
		5	104.76	118.58	99.88	111.94	141.21	115.274
		6	153.81	166.77	165.76	185.1	164.51	167.19
		7	104.06	150.21	116.49	117.33	121.99	122.016
		8	125.7	101.94	118.68	113.51	143.84	120.734
		9	170.02	150.52	144.53	134.5	161.47	152.208
		10	159.59	129.83	132.84	141.87	181.94	149.214
	2	1	178.1	129.81	95.2	108.21	116	125.464	148.247
		2	182.62	157.09	125.97	110.19	113.95	137.964
		3	231.09	243.84	196.14	129.44	83.33	176.768
		4	231.42	193.48	134.97	144.07	156.78	172.144
		5	161.44	145.66	159.24	131.98	121.96	144.056
		6	183.01	172.46	146.26	129.32	119.35	150.08
		7	122.5	150.13	151.63	148.66	96.06	133.796
		8	188.84	139.23	137.52	121.21	124.03	142.166
		9	258.64	188.08	133.5	107.58	104.19	158.398
		10	159.59	144.94	145.61	137.36	120.67	141.634
	3	1	149.54	120.87	108.94	82.33	85.74	109.484	123.185
		2	151.44	152.5	104.1	68.22	69.73	109.198
		3	98.49	135.98	118.26	142.9	122.41	123.608
		4	145.99	146.46	139.61	60.37	79.88	114.462
		5	149.17	166.4	151.12	175.93	145	157.524
		6	103.31	104.73	99.38	118.37	179.99	121.156
		7	136.77	106.93	101.26	136.55	195.17	135.336
		8	153.66	125.73	105.93	89.64	98.23	114.638
		9	145.35	123.04	132.44	107.89	105.1	122.764
		10	155.89	144.21	108.72	122.73	86.86	123.682
	4	1	231.96	221.38	181.78	201.99	207.66	208.954	190.138
		2	200.35	222.96	149.73	186.24	172.12	186.28
		3	144.23	202.03	217.04	186.77	174.81	184.976
		4	245.61	158.65	194.8	211.69	215.41	205.232
		5	235.16	185.61	234.79	191.28	280.86	225.54
		6	204.74	185.36	196.33	133.5	193.75	182.736
		7	183.95	243.76	220.43	188.2	218.2	210.908
		8	194.64	239.82	194.05	215.18	211.62	211.062
		9	86.51	64.4	109.37	132.04	137.7	106.004
		10	180.98	182.67	163.69	199.08	172.01	179.686
	5	1	153.35	154.53	163.51	183.5	206.16	172.21	155.7
		2	147.48	111.94	136.43	144.35	185.26	145.092
		3	172.65	180.52	197.91	187.18	145.93	176.838
		4	109.1	150.78	131.56	134.18	165.67	138.258
		5	98.02	134.69	159.48	175.66	181.83	149.936
		6	185.55	138.36	194.37	180.52	161.29	172.018
		7	117.19	98.29	190.51	125.35	166.51	139.57
		8	138.87	143.47	147.78	152.08	170.57	150.554
		9	164.72	165.18	113.26	168.36	174.9	157.284
		10	158.64	147.05	127.76	167.55	175.2	155.24
	6	1	99	134.35	155	153.89	134.45	135.338	153.896
		2	172.26	113.29	153.89	118.44	159.17	143.41
		3	171.77	129.27	133.43	146.75	144.09	145.062
		4	204.22	195.64	132.65	166.24	152.95	170.34
		5	136.13	141.37	112.59	105.84	116.26	122.438
		6	182.52	157.64	177.11	198.89	149.68	173.168
		7	204.78	195.84	193.35	186.51	145.54	185.204
		8	183.24	161.56	159.87	147.48	156.85	161.8
		9	200.55	151.45	127.37	150.52	160.67	158.112
		10	179.36	148.67	150.71	149.75	91.95	144.088
[truncated: 10 more columns]

## Sheet: tamoxifen experiment no. 1
substance:	tamoxifen										substance:	tamoxifen										substance:	tamoxifen						substance:	tamoxifen				substance:	tamoxifen				substance:	tamoxifen						substance:	tamoxifen
experiment no.:	1										experiment no.:	1										experiment no.:	1						experiment no.:	1				experiment no.:	1				experiment no.:	1						experiment no.:	1
endpoint:	cortex thickness [µm]										endpoint:	cortex thickness [µm]										endpoint:	seminiferous tubules [%]		total area of picture=	136000	µm² = 100%		endpoint:	gonad surface area [mm²]				endpoint:	gonad surface area [mm²]				endpoint:	mortality [%]						endpoint:	malformations
genetic sex:	female										genetic sex:	male										genetic sex:	male						genetic sex:	female				genetic sex:	male				genetic sex:	male + female						genetic sex:	male + female
test group	embryo no.	slice no.	values measured on slice [µm]					slice mean [µm]	embryo mean [µm]		test group	embryo no.	slice no.	measurements per slice [µm]					slice mean [µm]	embryo mean [µm]		test group	embryo no.	slice no.	slice mean [µm²]	slice mean [%]	embryo mean [%]		test group	embryo no.	left ovary [mm²]	right ovary [mm²]		test group	embryo no.	left testis [mm²]	right testis [mm²]		test group	∑ eggs	∑ infertilized eggs	∑ vital embryos	∑ mortal embryos	mortal embryos [%]		test group	∑ fertilized eggs	∑malformed embryos	∑ malformations
			1	2	3	4	5							1	2	3	4	5
untreated control	1	1	159.099	171.128	182.622	174.071	148.931	167.17	164.885		untreated control	1	1	6.72	6.31	6.72	6.07	8.59	6.882	9.0546		untreated control	1	1	45502.2	33.4575	30.0169		untreated control	1	9.21	1.84		untreated control	1	3.12	2.41		untreated control	20	1	19	0	0		untreated control	19	0	0
		2	201.246	177.42	157.025	168.688	123.73	165.622					2	8.09	9	9.18	11.03	9.17	9.294					2	37437.7	27.5277				2	11.48	2.1			2	3.08	2.66		solvent control	12	2	9	1	10		solvent control	10	0	0
		3	165.103	150.148	139.256	99.45	103.9	131.571					3	11.56	8.95	10.68	8.83	13.44	10.692					3	38804.3	28.5326				3	10.11	2.07			3	4.13	4.17		0,1 µg tamoxifen/g egg	13	3	5	5	50		0,1 µg tamoxifen/g egg	10	1	2
		4	234.919	252.907	199.487	201.942	219.015	221.654					4	11.49	7.51	6.15	7.12	9.62	8.378					4	40428.5	29.7268				4	9.33	2.37			4	4.48	4.38		1 µg tamoxifen/g egg	13	0	9	4	30.7692		1 µg tamoxifen/g egg	13	0	0
		5	155.604	148.595	144.01	116.658	84.233	129.82					5	9.32	7.96	7.1	5.85	10.04	8.054					5	40193.2	29.5538				5	8.95	2.03			5	3.94	3.21		10 µg tamoxifen/g egg	12	0	8	4	33.3333		10 µg tamoxifen/g egg	12	0	0
		6	128.293	143.071	160.174	178.466	156.873	153.375					6	9.32	10.01	12.54	11.12	11.61	10.92					6	41542.1	30.5457				6	13.5	1.72			6	3.91	3.76
		7	76.667	135.649	137.179	169.609	160.702	135.961					7	11.28	8.79	7.13	8.91	10.45	9.312					7	38900.9	28.6036				7	7.47	1.68			7	3.36	3.68
		8	187.12	204.235	206.48	231.638	221.262	210.147					8	10.96	8.05	9.36	11.62	12.37	10.472					8	32001.2	23.5303				8	9.33	2.49			8	3.68	3.56
		9	227.323	230.773	198.277	210.246	212.41	215.806					9	8.02	6.67	6.72	10.42	7.86	7.938					9	50555.3	37.173				9	11.01	1.97			9	4.49	4.1
		10	155.119	128.695	102.554	109.608	92.616	117.718					10	8.33	8.75	7.93	8.34	9.67	8.604					10	42864.1	31.5177				10	10.03	-		solvent control	1	3.28	2.76
	2	1	157.421	165.078	186.674	196.08	183.685	177.788	157.686			2	1	10.417	11.733	12.112	10.647	8.917	10.7652	8.94242			2	1	34442	25.325	28.6883		solvent control	1	9.13	2.01			2	2.98	2.22
		2	203.369	190.221	189.936	157.025	170.656	182.241					2	9.619	11.859	10.68	10.623	11.219	10.8					2	36974.4	27.1871				2	9.02	1.94			3	4.04	3.83
		3	157.72	142.697	145.855	130.096	130.003	141.274					3	4.751	5.154	5.559	6.346	8.09	5.98					3	37632.3	27.6708				3	7.8	1.99			4	3.72	2.91
		4	158.598	168.434	162.637	143.336	145.871	155.775					4	7.96	5.966	8.344	7.603	9.592	7.893					4	38344.7	28.1946				4	10.34	2.11			5	3.48	3.17
		5	228.777	229.326	219.034	231.568	209.195	223.58					5	6.897	7.12	9.619	8.498	10.308	8.4884					5	34979.3	25.7201			0,1 µg tamoxifen/g egg	1	8.81	0.1		0,1 µg tamoxifen/g egg	1	3.85	3.73
		6	125.469	139.167	146.669	110.028	138.584	131.983					6	11	9.592	6.783	9.691	10.017	9.4166					6	41858.4	30.7782			1 µg tamoxifen/g egg	1	10.48	2.14			2	3.84	2.72
		7	129.692	137.581	115.232	145.547	151.804	135.971					7	12.5	6.588	8.302	8.302	10.417	9.2218					7	42272.4	31.0826				2	9.37	2.19			3	3.52	2.72
		8	137.328	138.205	148.74	162.361	149.685	147.264					8	9.727	11.281	10.45	8.995	12.339	10.5584					8	36622.2	26.9281				3	9.47	2.45			4	3.7	2.55
		9	145.435	155.503	142.743	112.114	152.154	141.59					9	9.1	7.66	8.015	8.437	10.078	8.658					9	49093.6	36.0982			10 µg tamoxifen/g egg	1	4.79	1.51			5	4.16	3.78
		10	145.242	147.319	113.853	136.242	154.311	139.393					10	9.904	5.966	5.154	8.09	9.1	7.6428					10	37941.2	27.8979				2	6.38	2.25		1 µg tamoxifen/g egg	1	2.99	2.21
	3	1	200.363	193.091	191.661	151.348	157.65	178.823	163.477			3	1	10.623	6.009	9.501	7.277	7.784	8.2388	7.4209			3	1	32360.1	23.7942	25.9286			3	4.15	2.13			2	4.25	2.7
		2	184.438	184.573	237.634	208.6	199.757	203					2	8.907	8.907	8.375	9.204	11.032	9.285					2	28007.4	20.5937				4	6.08	1.77			3	4.12	2.69
		3	145.01	146.783	135.741	111.819	118.582	131.587					3	8.09	7.277	7.277	8.995	8.829	8.0936					3	46485.3	34.1804				5	1.63	1.14			4	4.13	3.46
		4	183.948	195.691	188.654	159.757	151.192	175.848					4	4.658	3.359	3.953	3.359	6.152	4.2962					4	34874.9	25.6433				6	3.81	1.78			5	3.77	2.91
		5	171.933	209.367	195.663	151.222	148.766	175.39					5	7.546	8.427	8.907	7.906	8.207	8.1986					5	37027.2	27.2259				7	5.14	1.95			6	4.16	2.72
		6	204.885	175.192	164.186	175.557	147.716	173.507					6	5.848	5.893	8.7	5.433	8.375	6.8498					6	43918.6	32.2931								10 µg tamoxifen/g egg	1	3.16	2.99
		7	177.126	161.308	186.238	183.136	144.513	170.464					7	10.069	8.207	9.878	9.223	8.437	9.1628					7	25438.7	18.7049									2	2.7	3.01
		8	146.811	136.509	130.453	146.235	151.882	142.378					8	5.559	5.433	6.346	5.069	7.096	5.9006					8	31527.6	23.1821
		9	136.852	152.32	158.158	135.821	127.739	142.178					9	7.083	6.36	6.152	6.009	9.446	7.01					9	39218.7	28.8373
		10	140.626	138.529	131.247	159.236	138.343	141.596					10	7.383	6.152	7.96	7.096	7.277	7.1736					10	33770.3	24.8311
	4	1	178.516	182.308	156.047	146.539	146.159	161.914	163.382			4	1	9.176	7.5	5.417	5.848	7.383	7.0648	7.76006			4	1	29350.3	21.5811	30.4649
		2	180.233	176.086	169.345	151.669	177.57	170.981					2	7.132	10.078	7.512	7.906	8.839	8.2934					2	51980.5	38.221
		3	204.403	217.233	203.697	179.314	195.975	200.124					3	9.592	9.619	8.76	10.425	10.491	9.7774					3	47560	34.9706
		4	164.895	143.691	175.05	180.004	173.576	167.443					4	6.588	7.512	8.59	7.649	7.862	7.6402					4	44877.2	32.9979
		5	152.491	150.289	164.359	164.851	176.904	161.779					5	6.935	8.917	8.858	7.071	6.009	7.558					5	41879.9	30.794
		6	142.151	132.448	129.77	157.286	149.808	142.293					6	6.897	8.047	6.719	7.383	8.302	7.4696					6	44370.4	32.6253
		7	196.843	213.314	175.602	140.201	133.273	171.847					7	5.606	5.606	5.606	6.509	5.922	5.8498					7	40934.4	30.0988
		8	139.573	153.03	160.288	167.631	201.517	164.408					8	8.385	7.649	7.75	7.512	6.935	7.6462					8	35741	26.2801
		9	130.794	129.757	125.513	152.352	150.566	137.796					9	7.66	9.363	5.922	5.922	7.75	7.3234					9	43046.8	31.6521
		10	156.296	150.868	146.159	160.141	162.707	155.234					10	7.649	8.09	9.014	8.917	11.219	8.9778					10	34581.5	25.4276
	5	1	138.609	165.852	161.789	153.471	150.261	153.996	146.115			5	1	8.047	10.017	8.427	9.167	8.344	8.8004	7.72284			5	1	37726.2	27.7399	26.057
		2	190.527	178.403	162.577	149.761	131.659	162.585					2	6.872	8.839	8.333	7.193	7.603	7.768					2	27376.1	20.1295
		3	203.361	195.84	179.184	154.203	133.918	173.301					3	8.995	7.906	6.374	7.546	8.829	7.93					3	30122.6	22.149
		4	159.48	156.103	135.997	130.908	103.983	137.294					4	8.015	7.5	7.5	7.5	6.719	7.4468					4	38443.6	28.2674
		5	159.698	170.768	160.312	165.053	160.853	163.337					5	7.683	8.437	8.302	6.152	8.975	7.9098					5	29287.3	21.5348
		6	100.139	104.376	100.461	99.177	110.028	102.836					6	8.375	9.583	8.76	8.79	7.083	8.5182					6	35868.6	26.374
		7	157.932	178.201	145.328	134.084	122.395	147.588					7	9.252	9.583	9.204	8.333	10.841	9.4426					7	39256.2	28.8649
		8	125.543	118.254	127.758	106.122	106.719	116.879					8	5.893	6.305	5.48	5.966	4.877	5.7042					8	42852.2	31.509
		9	132.615	143.314	162.788	159.513	149.334	149.513					9	6.68	5.966	6.985	6.067	5.559	6.2514					9	40311.4	29.6407
		10	164.014	164.359	162.4	145.461	132.853	153.817					10	9.691	5.966	7.454	5.789	8.385	7.457					10	33130.8	24.3609
	6	1	151.703	184.319	193.479	165.936	169.218	172.931	176.933			6	1	11.335	11.38	8.59	10.623	11.008	10.5872	9.65934			6	1	40076.3	29.4679	23.8881
		2	175.081	157.449	161.385	137.581	185.833	163.466					2	9.583	10.623	12.255	11.555	12.87	11.3772					2	39416.1	28.9824
		3	170.018	182.553	200.009	210.756	265.918	205.851					3	13.34	10.009	7.928	7.132	10.841	9.85					3	27751.1	20.4052
		4	178.532	161.094	154.715	171.29	176.529	168.432					4	9.665	8.79	7.277	8.498	7.603	8.3666					4	35009.9	25.7426
		5	184.285	152.557	156.036	156.134	150.113	159.825					5	8.344	7.096	8.437	8.302	10.308	8.4974					5	27082.7	19.9138
		6	203.637	204.574	200.106	198.781	187.463	198.912					6	8.427	10.009	10.035	8.344	8.839	9.1308					6	28103.8	20.6646
		7	133.593	124.242	174.454	154.149	177.531	152.794					7	7.5	7.193	8.839	9.1	10.078	8.542					7	27233.6	20.0247
		8	177.93	165.38	174.414	149.176	118.702	157.12					8	10.078	7.512	5.966	7.546	9.252	8.0708					8	29871.1	21.964
		9	185.521	224.074	199.069	212.827	177.173	199.733					9	11.932	11.335	11.18	9.691	9.223	10.6722					9	30295.9	22.2764
		10	182.85	198.65	194.743	178.895	196.216	190.271					10	11.674	13.359	9.904	11.118	11.441	11.4992					10	40037.9	29.4396
	7	1	172.502	179.215	200.531	213.803	193.398	191.89	163.486			7	1	10.417	9.665	10.078	11.373	9.583	10.2232	9.13498			7	1	43318	31.8515	29.8724
		2	154.706	190.002	173.143	207.607	182.148	181.521					2	8.302	8.437	10.809	8.58	9.619	9.1494					2	37826.6	27.8137
		3	166.587	198.062	213.177	186.078	190.442	190.869					3	8.207	6.152	6.731	9.363	10.417	8.174					3	41825.3	30.7539
		4	144.839	156.924	183.525	180.574	180.378	169.248					4	10.138	10.078	9.176	7.917	11.696	9.801					4	47541.3	34.9568
		5	154.065	159.637	184.106	201.668	191.231	178.141					5	8.76	10.491	8.015	8.427	9.317	9.002					5	42363	31.1493
		6	131.416	157.709	166.642	164.243	163.743	156.751					6	9.592	9.583	9.619	10.961	8.79	9.709					6	40369.2	29.6832
		7	119.315	135.044	157.277	155.002	170.516	147.431					7	7.546	8.344	7.917	9.807	10.45	8.8128					7	36749.8	27.0219
		8	88.792	95.168	128.479	133.921	141.249	117.522					8	11.373	11.785	12.091	12.528	12.091	11.9736					8	33586	24.6956
		9	125.734	160.522	157.167	176.621	141.109	152.231					9	5.433	5.303	4.877	6.897	6.36	5.774					9	40088.9	29.4771
		10	132.741	150.354	145.605	168.393	149.176	149.254					10	10.623	8.271	8.946	7.512	8.302	8.7308					10	42596.7	31.3211
	8	1	147.434	150.981	165.412	183.523	144.109	158.292	155.97			8	1	5.833	7.96	6.522	5.417	5.417	6.2298	8.65353			8	1	44187.6	32.4909	30.0254
		2	166.785	156.625	186.222	166.975	160.349	167.391					2	9.176	9.167	7.193	9.727	8.427	8.738					2	35935	26.4228
		3	109.424	103.548	106.777	101.506	95.296	103.31					3	9.592	8.333	8.09	6.719	9.223	8.3914					3	40717.6	29.9394
		4	145.002	178.501	162.944	159.796	153.968	160.042					4	6.872	8.907	9.665	8.79	7.603	8.3674					4	38383.9	28.2235
		5	162.055	153.227	146.596	140.991	165.766	153.727					5	5.417	6.374	8.498	7.5	8.344	7.2266					5	36727.7	27.0057
		6	141.05	153.598	147.01	148.598	154.655	148.982					6	7.383	7.546	7.546	10.841	6.68	7.9992					6	40837.8	30.0278
		7	154.655	144.131	134.848	130.181	133.638	139.491					7	11.258	10.078	9.252	8.995	8.839	9.6844					7	38495.3	28.3054
		8	130.504	136.14	124.393	146.669	166.667	140.875					8	8.76	13.34	10.549	7.928	10.009	10.1172					8	46211.2	33.9788
		9	208.553	196.492	189.576	225.1	182.233	200.391					9	10.865	9.176	11.373	11.281	12.944	11.1278					9	38774.4	28.5106
		10	201.029	136.629	173.534	205.042	219.779	187.203					10	-	-	-	-	-	-					10	48074.7	35.349
	9	1	158.493	160.686	169.355	176.543	187.62	170.539	167.813			9	1	7.132	6.264	7.12	8.015	5.433	6.7928	7.39444			9	1	46551.6	34.2291	25.8968
		2	130.437	159.099	168.69	129.169	180.156	153.51					2	8.79	7.454	7.828	7.828	7.66	7.912					2	33577.2	24.6891
		3	170.524	162.517	153.573	162.297	157.421	161.266					3	8.015	8.437	6.25	7.372	6.009	7.2166					3	42617.1	31.3361
		4	131.405	127.935	136.753	132.51	140.954	133.911					4	6.935	8.004	7.683	7.512	8.946	7.816					4	27747.2	20.4024
		5	207.205	188.424	204.819	217.425	226.883	208.951					5	7.862	8.67	6.25	7.96	6.509	7.4502					5	39482.1	29.031
		6	159.437	159.48	162.344	172.373	185.414	167.81					6	7.683	8.76	9.252	8.917	7.649	8.4522					6	29418.6	21.6313
		7	150.208	143.2	156.049	178.672	178.294	161.285					7	8.047	6.374	6.588	7.277	6.985	7.0542					7	32117.4	23.6157
		8	140.389	122.715	160.835	156.367	171.061	150.273					8	5.667	6.897	6.522	6.25	7.372	6.5416					8	33158	24.3809
		9	210.528	218.74	202.122	206.845	219.295	211.506					9	7.277	8.004	9.1	8.995	7.193	8.1138					9	36878.1	27.1163
		10	164.783	187.691	158.8	114.897	169.241	159.082					10	6.522	7.862	6.36	4.859	7.372	6.595					10	30648.5	22.5357
	10	1	145.321	143.537	148.756	109.37	172.018	143.8	145.696		solvent control	1	1	10.961	6.305	7.083	5.433	7.132	7.3828	7.50762		solvent control	1	1	49449.3	36.3598	32.009
		2	127.072	79.848	93.382	107.6	120.698	105.72					2	7.383	7.96	5.966	7.083	8.015	7.2814					2	45643	33.561
		3	135.064	143.113	139.543	157.396	166.644	148.352					3	7.928	7.512	8.09	6.374	8.015	7.5838					3	45859.1	33.7199
		4	160.312	160.106	177.375	170.157	160.368	165.664					4	5.433	6.872	5.559	7.12	6.468	6.2904					4	46108.9	33.9036
		5	178.158	147.427	149.873	161.634	158.151	159.049					5	9.619	7.546	7.928	7.132	6.264	7.6978					5	48224.8	35.4594
		6	155.179	147.667	148.924	150.28	119.936	144.397					6	8.829	7.906	9.501	9.014	9.904	9.0308					6	38346	28.1956
		7	195.663	185.279	190.904	162.44	145.95	176.047					7	5.433	4.877	8.09	6.346	6.468	6.2428					7	37322.9	27.4433
		8	181.081	200.21	148.931	135.874	172.79	167.777					8	7.906	7.12	10.017	9.619	9.363	8.805					8	42137.5	30.9835
		9	173.335	130.876	134.825	156.056	189.696	156.958					9	6.897	8.218	8.58	6.522	7.828	7.609					9	44613.6	32.8041
		10	95.866	51.814	96.53	98.393	103.364	89.1934					10	8.218	7.512	6.36	5.922	7.75	7.1524					10	37617.9	27.6602
solvent control	1	1	275.081	206.749	191.422	142.619	135.856	190.345	135.128			2	1	7.683	9.317	8.79	11.607	10.249	9.5292	8.64582			2	1	33619.4	24.7201	27.2412
		2	157.555	197.502	151.063	173.855	224.284	180.852					2	10.417	7.083	6.264	6.872	6.667	7.4606					2	34575.4	25.4231
		3	114.194	102.53	100	129.298	86.923	106.589					3	11.258	8.907	8.498	9.204	9.665	9.5064					3	36824	27.0765
		4	102.442	129.231	132.95	132.314	131.202	125.628					4	5.069	4.658	5.017	5.848	4.658	5.05					4	39786.3	29.2546
		5	104.947	104.805	107.555	129.882	77.947	105.027					5	7.546	9.592	10.425	11.258	9.176	9.5994					5	38666.8	28.4315
		6	93.816	166.835	155.479	128.285	169.169	142.717					6	7.66	10.017	9.754	11.095	10.865	9.8782					6	39287.6	28.8879
		7	120.43	96.742	125.236	119.641	163.406	125.091					7	6.667	9.167	8.907	7.383	7.828	7.9904					7	37638.2	27.6751
		8	68.12	115.626	101.67	124.348	160.853	114.123					8	6.667	8.427	7.193	9.1	9.619	8.2012					8	45568.1	33.506
		9	116.216	91.58	87.928	112.114	159.343	113.436					9	8.015	10.009	10.215	8.975	10.541	9.551					9	28568.4	21.0062
		10	134.848	145.242	154.821	158.202	144.253	147.473					10	9.727	10	9.4	10.905	8.427	9.6918					10	35945.5	26.4305
	2	1	147.667	107.874	78.868	124.304	117.391	115.221	161.8			3	1	10.291	7.66	7.649	10.45	9.691	9.1482	9.18098			3	1	39613.3	29.1274	27.1476
		2	153.716	144.415	131.598	157.709	155.914	148.67					2	10.291	7.277	7.66	8.218	12.535	9.1962					2	38082.6	28.0019
		3	191.638	166.015	177.615	171.796	188.363	179.085					3	8.76	11.939	10.069	11.219	9.148	10.227					3	26738.5	19.6607
		4	73.942	130.197	159.088	94.34	94.843	110.482					4	10.541	8.047	10.623	13.649	6.588	9.8896					4	34492.9	25.3624
		5	195.466	175.311	188.654	190.591	214.431	192.891					5	8.829	10.68	7.649	8.015	6.719	8.3784					5	37190.1	27.3457
		6	207.903	178.781	207.071	126.23	184.97	180.991					6	8.09	8.344	8.59	9.501	8.995	8.704					6	42068.9	30.933
		7	177.768	197.343	211.009	167.276	180.303	186.74					7	10.442	11.373	9.363	7.096	9.363	9.5274					7	38802.5	28.5313
		8	176.669	163.989	149.467	150.157	170.898	162.236					8	9.363	10.215	10.833	9.1	7.132	9.3286					8	36100.8	26.5447
		9	190.263	176.667	200.111	223.995	201.777	198.563					9	11.118	9.727	10.146	10.491	8.907	10.0778					9	38429.4	28.2569
		10	140.131	146.534	152.68	134.67	141.6	143.123					10	7.132	7.784	6.374	6.783	8.59	7.3326					10	37688.8	27.7124
	3	1	153.354	111.667	135.126	116.679	172.474	137.86	172.479			4	1	6.783	7.683	7.512	7.289	7.75	7.4034	7.45518			4	1	38980.2	28.6619	25.7613
		2	171.857	137.369	138.506	132.584	180.518	152.167					2	10.146	10.308	8.09	8.59	8.839	9.1946					2	42327.8	31.1234
		3	78.938	87.122	120.306	138.228	123.738	109.666					3	10.069	9.317	6.346	7.454	6.731	7.9834					3	40379.5	29.6908
		4	202.164	189.673	199.976	174.642	161.28	185.547					4	7.383	6.194	5.966	8.186	6.667	6.8792					4	31912.5	23.4651
		5	160.971	179.546	173.783	171.491	107.215	158.601					5	5.035	5.667	9.148	6.468	7.546	6.7728					5	27022.2	19.8693
		6	145.871	143.807	138.424	145.01	156.669	145.956					6	7.277	6.194	7.66	6.731	7.512	7.0748					6	34893.1	25.6567
		7	285.954	247.501	237.572	207.152	216.827	239.001					7	9.691	7.383	7.66	7.512	8.207	8.0906					7	33940.8	24.9565
		8	145.086	137.399	196.023	208.383	190.002	175.379					8	7.862	7.862	7.083	7.512	7.083	7.4804					8	36773.6	27.0394
		9	177.883	173.911	170.815	208.715	227.928	191.85					9	6.719	6.264	6.985	6.305	6.194	6.4934					9	37685.1	27.7096
		10	200.466	212.629	217.857	258.656	254.189	228.759					10	7.96	7.383	7.193	7.512	5.848	7.1792					10	26438.5	19.4401
	4	1	183.364	190.981	185.27	191.88	177.095	185.718	174.949			5	1	5.017	8.302	5.667	6.588	6.374	6.3896	7.4476			5	1	40539	29.8081	26.9798
		2	208.708	173.959	169.355	159.149	138.764	169.987					2	9.4	7.928	6.68	6.667	7.5	7.635					2	38866.3	28.5782
		3	183.948	172.192	191.228	180.303	164.522	178.439					3	6.067	6.588	7.66	7.512	6.067	6.7788					3	33458.3	24.6017
		4	150.245	158.763	174.185	190.447	195.665	173.861					4	6.935	7.828	5.035	6.346	7.906	6.81					4	40875	30.0551
		5	160.68	150.695	153.009	140.159	164.743	153.857					5	6.68	6.25	8.09	7.096	13.359	8.295					5	43915.8	32.291
		6	168.542	119.936	155.68	155.501	211.44	162.22					6	10.215	9.904	9.138	7.66	8.437	9.0708					6	37634.6	27.6725
		7	156.456	163.658	162.865	157.403	163.106	160.698					7	4.602	5.069	6.719	6.667	8.375	6.2864					7	32151.8	23.641
		8	211.944	200.529	173.855	184.636	197.999	193.793					8	5.966	6.36	5.154	7.512	6.897	6.3778					8	35883.8	26.3851
		9	178.14	194.654	176.787	193.916	179.732	184.646					9	7.454	9.511	9.511	8.09	8.015	8.5162					9	31369.2	23.0656
		10	199.405	171.286	193.506	186.048	181.125	186.274					10	8.76	7.828	8.207	8.207	8.58	8.3164					10	32231.2	23.6994
0,1 µg tamoxifen/g egg	1	1	219.902	164.099	169.142	215.345	186.194	190.936	136.16		0,1 µg tamoxifen/g egg	1	1	11	8.385	6.067	6.468	5.559	7.4958	7.99242		0,1 µg tamoxifen/g egg	1	1	39819	29.2787	24.7725
		2	151.996	139.588	160.366	204.372	130.013	157.267					2	7.12	7.546	5.559	5.789	6.009	6.4046					2	32733.7	24.0689
		3	142.619	136.679	131.175	132.238	147.064	137.955					3	8.59	8.015	9.754	7.277	9.1	8.5472					3	29887.9	21.9764
		4	172.699	151.667	161.72	43.333	95.964	125.077					4	8.218	6.482	7.096	8.271	9.834	7.9802					4	35691.9	26.244
		5	137.359	94.476	114.87	111.865	97.218	111.158					5	6.588	8.015	7.828	7.277	8.76	7.6936					5	30686.1	22.5633
		6	167.193	151.181	152.934	139.428	136.565	149.46					6	7.649	4.658	3.953	5.221	4.29	5.1542					6	31270.5	22.993
		7	108.692	116.515	114.021	93.11	145.519	115.571					7	9.176	7.96	9.138	7.96	10.017	8.8502					7	30346.7	22.3137
		8	177.502	182.218	157.767	158.046	167.583	168.623					8	11	10.249	11.555	10.172	8.333	10.2618					8	36147.1	26.5788
		9	43.461	102.008	118.345	122.602	147.585	106.8					9	10.516	8.946	7.75	8.79	5.789	8.3582					9	35488	26.0941
		10	71.01	66.708	108.333	120	127.72	98.7542					10	9.138	9.014	9.763	8.25	9.727	9.1784					10	34834.6	25.6137
1 µg tamoxifen/g egg	1	1	96.756	110.082	16.874	18.634	98.337	68.1366	53.4621			2	1	10.937	10.45	7.784	8.7	7.683	9.1108	7.3473			2	1	26909.7	19.7865	23.1522
		2	0	0	0	0	0	0					2	9.727	7.928	8.344	9.176	6.68	8.371					2	32207	23.6816
		3	0	0	0	0	0	0					3	7.546	7.683	5.848	6.25	9.363	7.338					3	28538.6	20.9843
		4	0	0	0	0	0	0					4	6.468	5.433	4.104	7.132	7.12	6.0514					4	29368.5	21.5945
		5	119.481	153.172	235.732	232.026	244.273	196.937					5	5.154	5.833	6.305	6.68	5.848	5.964					5	26517.9	19.4985
		6	135.003	91.852	0	0	0	45.371					6	5.017	8.302	9.754	6.719	8.437	7.6458					6	28542.8	20.9874
		7	15.723	21.619	23.863	20.138	18.276	19.9238					7	6.667	7.5	4.583	7.917	8.015	6.9364					7	29790.7	21.9049
		8	209.53	195.292	173.245	172.701	0	150.154					8	8.302	7.603	7.928	8.498	7.193	7.9048					8	36641.3	26.9421
		9	0	0	0	0	0	0					9	9.204	10.905	8.015	7.96	5.893	8.3954					9	41065.1	30.1949
		10	0	0	0	0	270.495	54.099					10	7.096	5.417	5.833	4.167	6.264	5.7554					10	35288.2	25.9472
	2	1	169.448	171.432	136.629	177.351	154.439	161.86	116.345			3	1	9.904	9.619	6.872	5.417	6.305	7.6234	7.93358			3	1	32910.2	24.1987	25.4113
		2	91.682	89.182	82.651	98.841	138.373	100.146					2	8.186	7.546	8.302	7.683	8.427	8.0288					2	45770.7	33.6549
		3	142.019	98.841	88.651	70.833	97.258	99.5204					3	7.96	5.893	6.667	7.096	9.204	7.364					3	29814.2	21.9222
		4	136.239	138.409	131.003	133.427	123.345	132.485					4	7.96	7.928	9.223	6.731	8.79	8.1264					4	35421.5	26.0452
		5	102.808	116.219	144.415	167.286	160.943	138.334					5	6.152	8.218	7.512	9.138	10.417	8.2874					5	31046.5	22.8283
		6	112.512	103.364	141.721	115.905	95.197	113.74					6	9.904	8.59	8.76	9.583	6.68	8.7034					6	27749.4	20.404
		7	90.015	93.333	91.078	81.875	108.541	92.9684					7	5.667	5.833	5.966	7.193	8.59	6.6498					7	43824.1	32.2236
		8	128.66	148.511	84.578	80.087	102.5	108.867					8	7.603	8.302	10.417	8.907	8.839	8.8136					8	35595.7	26.1733
		9	73.409	86.414	75.902	79.917	74.87	78.1024					9	6.985	5.966	7.277	6.305	9.592	7.225					9	31184.3	22.9296
		10	137.26	129.682	119.936	136.232	164.04	137.43					10	9.176	8.333	10.809	7.784	6.468	8.514					10	32277.6	23.7335
	3	1	126.299	139.177	146.705	144.227	149.501	141.182	105.588			4	1	7.512	5.154	6.36	8.549	6.588	6.8326	8.58486			4	1	36968.4	27.1826	29.2744
		2	80.004	91.973	121.12	136.142	132.524	112.353					2	7.083	7.383	8.7	8.79	11.219	8.635					2	39701.4	29.1922
		3	129.274	132.879	148.497	157.465	128.552	139.333					3	8.839	10	10.905	7.454	6.468	8.7332					3	35009	25.7419
		4	116.872	105.548	111.931	144.962	138.012	123.465					4	7.66	7.383	7.132	6.468	7.784	7.2854					4	44594.5	32.7901
		5	198.942	176.732	170.841	107.503	70.045	144.813					5	6.588	6.264	7.917	8.207	6.305	7.0562					5	40277.4	29.6157
		6	118.755	81.181	79.272	55.902	47.405	76.503					6	10.146	9.4	10.138	7.906	6.468	8.8116					6	40835.8	30.0263
		7	119.736	123.561	87.504	23.333	0	70.8268					7	8.047	6.897	9.501	10.865	9.223	8.9066					7	39168.1	28.8001
		8	0	117.998	128.111	136.181	147.688	105.996					8	12.388	10.817	9.807	10.817	12.782	11.3222					8	47409.6	34.86
		9	125.836	130.043	97.504	70	0	84.6766					9	8.839	9.204	8.76	11.622	13.156	10.3162					9	37122.5	27.296
		10	100.253	87.955	95.441	0	0	56.7298					10	8.344	8.015	6.783	7.383	9.223	7.9496					10	37044.7	27.2387
10 µg tamoxifen/g egg	1	1	59.173	52.526	67.521	48.333	239.69	93.4486	94.0398		1 µg tamoxifen/g egg	1	1	8.3	7.91	7.6	8.19	8.76	8.152	9.7738		1 µg tamoxifen/g egg	1	1	43555.7	32.0262	30.9266
		2	0	0	0	0	0	0					2	10.14	10.04	9.4	8.75	10.45	9.756					2	33665.8	24.7543
		3	274.55	318.706	292.115	278.992	233.007	279.474					3	11.2	13.26	9.43	10.02	9.18	10.618					3	40564.5	29.8268
		4	0	0	0	0	0	0					4	10.08	12.37	13.29	6.59	8.95	10.256					4	37221.2	27.3685
		5	0	0	0	0	290.981	58.1962					5	10.02	10.68	11.07	11.86	11.22	10.97					5	46728.5	34.3592
		6	0	0	0	247.558	321.482	113.808					6	8.83	9.9	12.49	9.17	10.43	10.164					6	46318	34.0574
		7	0	0	0	0	294.666	58.9332					7	11.18	8.34	10.42	12.51	12.13	10.916					7	45593.8	33.5249
		8	251.84	236.954	227.123	230.112	194.874	228.181					8	11.46	8.21	8.98	6.78	10.45	9.176					8	45617.3	33.5421
		9	0	0	0	0	0	0					9	10.04	9.2	8.91	6.68	8.34	8.634					9	46997	34.5566
		10	150.946	176.543	122.613	54.038	37.648	108.358					10	9.18	10.08	10.45	6.52	9.25	9.096					10	34339.5	25.2496
	2	1	0	0	0	0	0	0	42.7256			2	1	16.64	10.08	8.22	8.95	5.22	9.822	8.2606			2	1	43941.2	32.3097	31.3404
		2	232.466	0	77.213	95.018	133.359	107.611					2	6.35	7.45	7.42	9.5	8.22	7.788					2	39944.1	29.3707
		3	37.905	27.513	40.731	52.941	0	31.818					3	6.59	7.83	7.51	6.87	7.12	7.184					3	39276.8	28.88
		4	0	0	0	0	0	0					4	8.76	9.59	9.67	10	7.51	9.106					4	40824.2	30.0178
		5	63.514	119.239	142.071	125.593	81.96	106.475					5	6.9	6.35	6.67	7.5	6.68	6.82					5	42453.7	31.216
		6	136.392	109.475	180.68	132.004	88.243	129.359					6	12.78	11.44	9.81	10.71	11.73	11.294					6	30912.4	22.7297
		7	0	0	0	0	0	0					7	6.31	7.13	5	5.07	7.13	6.128					7	46089.9	33.8896
		8	41.374	37.454	55.409	0	0	26.8474					8	7.45	8.91	9.25	8.34	5	7.79					8	44145.7	32.4601
		9	69.172	54.886	0	1.667	0	25.145					9	8.3	10.02	8.43	8.38	7.5	8.526					9	51398.2	37.7928
		10	0	0	0	0	0	0					10	12	9.52	6.47	5.97	6.78	8.148					10	47243.3	34.7377
	3	1	0	0	0	0	0	0	61.5302			3	1	11.74	12.49	8.95	8.95	9.88	10.402	9.9196			3	1	30531.4	22.4496	24.1922
		2	345.848	319.594	299.269	304.854	0	253.913					2	12.54	10.42	10.25	10.45	8.55	10.442					2	30645.2	22.5332
		3	0	0	0	0	0	0					3	13.29	12.17	11.59	11.79	12.17	12.202					3	27295.5	20.0702
		4	0	0	0	0	0	0					4	9.83	10.04	10.94	11.1	8.86	10.154					4	28789.8	21.169
		5	249.072	230.333	181.146	0	0	132.11					5	8.92	11.84	12.84	11.67	11.94	11.442					5	37232.6	27.3769
		6	199.111	127.873	96.209	0	0	84.6386					6	10.67	8.27	9.43	8.59	10.04	9.4					6	41391.7	30.4351
		7	190.977	187.396	144.073	110.028	0	126.495					7	9.43	9.25	7.75	8.84	8.27	8.708					7	32235.3	23.7024
		8	88.369	0	0	0	0	17.6738					8	6.9	6.72	7.08	6.94	8.79	7.286					8	28302.1	20.8104
		9	0	0	0	0	0	0					9	5.92	9.14	8.67	6.78	7.96	7.694					9	37339.8	27.4557
		10	0	2.357	0	0	0	0.4714					10	11	11.8	11.52	12.39	10.62	11.466					10	35250.8	25.9197
	4	1	163.938	136.611	160.801	155.724	164.395	156.294	84.9861			4	1	10.82	10.96	9.2	10.15	9.36	10.098	9.3752			4	1	42205	31.0331	26.6466
		2	67.175	52.447	44.175	53.626	96.267	62.738					2	9.36	8.83	10.42	10.83	9.2	9.728					2	38524.7	28.327
		3	221.973	0	0	0	0	44.3946					3	9.51	7.66	8.58	8.7	9.01	8.692					3	34349.4	25.2569
		4	0	0	0	206.737	229.789	87.3052					4	8.21	7.19	9.88	13.08	10.02	9.676					4	37594.4	27.6429
		5	0	0	0	0	0	0					5	6.9	10.22	8.09	6.26	8.7	8.034					5	29196.8	21.4682
		6	141.048	68.516	86.321	111.819	134.5	108.441					6	7.6	7.28	9.4	9.62	11.67	9.114					6	32852.1	24.156
		7	162.963	77.213	102.201	104.516	112.571	111.893					7	10.68	10.94	12.26	10.15	9.14	10.634					7	29634.8	21.7903
		8	0	0	127.584	162.925	166.987	91.4992					8	10.08	8.76	9.88	9.75	10.04	9.702					8	34468.9	25.3448
		9	122.077	174.535	187.546	218.74	232.406	187.061					9	10.15	9.81	10.83	7.55	6.73	9.014					9	40030.4	29.4341
		10	0	1.179	0	0	0	0.2358					10	8.76	8.84	8.7	10.02	8.98	9.06					10	43537.6	32.0129
	5	1	145.086	114.215	132.762	140	106.099	127.632	42.8945			5	1	11.61	9.14	11.73	14.14	13.18	11.96	9.9634			5	1	38173.6	28.0688	28.6964
		2	105.843	94.402	65.854	0	0	53.2198					2	7.96	8.27	6.31	10.25	12.67	9.092					2	42178.5	31.0136
		3	52.626	48.088	0	0	0	20.1428					3	11.58	7.42	15.1	9.43	8.33	10.372					3	46300.1	34.0442
		4	0	0	0	0	0	0					4	13.08	9.76	8	7.28	5.67	8.758					4	33429.4	24.5804
		5	90.247	80.872	93.337	92.045	75.392	86.3786					5	8.92	9.45	10.08	8	9.25	9.14					5	26955.8	19.8204
		6	90.569	79.796	69.172	95.033	86.991	84.3122					6	9.01	10.09	10.94	11.01	9.83	10.176					6	47191.8	34.6999
		7	0	69.467	81.82	31.678	0	36.593					7	10.84	10.83	9.62	9.5	11	10.358					7	38355.9	28.2029
		8	0	0	0	0	0	0					8	9.69	9.1	7.83	8.79	13.93	9.868					8	43688.1	32.1236
		9	0	0	0	52.77	50.559	20.6658					9	8.98	10.62	8.19	10.45	11.76	10					9	35756.9	26.2918
		10	0	0	0	0	0	0					10	9.69	11.94	9.67	7.96	10.29	9.91					10	38241.1	28.1185
	6	1	0	0	0	0	0	0	87.9562			6	1	7.51	8.5	6.47	8.76	5.97	7.442	8.3122			6	1	46652.3	34.3032	27.5731
		2	153.48	127.072	0	0	0	56.1104					2	6.99	8.84	10.04	10.83	8.59	9.058					2	33803.8	24.8557
		3	94.667	99.84	107.729	125.502	135.925	112.733					3	7.51	5.8	7.51	6.19	7.66	6.934					3	31994.5	23.5254
		4	170.239	130.65	111.408	111.657	132.668	131.324					4	9.51	8.02	6.35	8.98	7.92	8.156					4	32215.2	23.6876
		5	116.076	105.837	100.014	117.819	115.184	110.986					5	10.84	9.59	7.51	6.67	6.25	8.172					5	45592.7	33.524
		6	93.132	0	0	79.039	132.466	60.9274					6	7.6	7.28	7.1	7.55	8.19	7.544					6	30566	22.475
		7	115.332	129.617	148.67	179.492	151.112	144.845					7	8.84	8.84	9.58	8.59	11.93	9.556					7	36921.3	27.148
		8	0	0	0	0	0	0					8	7.28	6.15	7.83	7.13	8.44	7.366					8	42602.3	31.3252
		9	150.03	174.682	183.986	0	140.248	129.789					9	7.92	8.76	8.43	8.33	8.5	8.388					9	38841.8	28.5601
		10	115.027	127.674	127.633	139.289	154.616	132.848					10	10.82	11.03	10.45	10.87	9.36	10.506					10	35804.5	26.3268
	7	1	0	0	0	0	157.383	31.4766	72.2817		10 µg tamoxifen/g egg	1	1	9.43	12.11	9.45	8.55	9.5	9.808	8.2734		10 µg tamoxifen/g egg	1	1	33198.8	24.4109	24.7215
		2	201.388	196.614	195.58	190.369	209.704	198.731					2	5.09	6.59	6.15	5.79	6.52	6.028					2	35806	26.3279
		3	0	0	0	0	0	0					3	8.27	8.44	7.66	8.84	7.65	8.172					3	34714.4	25.5253
		4	217.666	198.116	215.26	174.436	170.931	195.282					4	7.68	6.51	5.92	5.34	7.1	6.51					4	33157.1	24.3802
		5	0	0	0	0	142.459	28.4918					5	10.02	9.45	7.07	6.78	7.37	8.138					5	27885.9	20.5043
		6	0	0	0	0	0	0					6	10.94	11.52	11.26	11.26	11.21	11.238					6	31781.9	23.369
		7	0	0	2.635	0	0	0.527					7	11.2	12.7	13.6	12.37	12.75	12.524					7	37406.3	27.5046
		8	146.128	171.824	195.67	216.001	217.83	189.491					8	6.51	6.78	9.14	6.48	8.92	7.566					8	26818.6	19.7196
		9	0	0	0	0	0	0					9	7.1	6.25	5.22	6.94	5.79	6.26					9	41969.1	30.8596
		10	0	0	95.931	136.354	161.804	78.8178					10	6.59	7.1	5.67	6.15	6.94	6.49					10	33474	24.6132
[truncated: 10 more columns]

## Sheet: tamoxifen experiment no. 2
substance:	tamoxifen										substance:	tamoxifen										substance:	tamoxifen						substance:	tamoxifen				substance:	tamoxifen				substance:	tamoxifen						substance:	tamoxifen
experiment no.:	2										experiment no.:	2										experiment no.:	2						experiment no.:	2				experiment no.:	2				experiment no.:	2						experiment no.:	2
endpoint:	cortex thickness [µm]										endpoint:	cortex thickness [µm]										endpoint:	seminiferous tubules [%]		total area of picture=	136000	µm² = 100%		endpoint:	gonad surface area [mm²]				endpoint:	gonad surface area [mm²]				endpoint:	mortality [%]						endpoint:	malformations
genetic sex:	female										genetic sex:	male										genetic sex:	male						genetic sex:	female				genetic sex:	male				genetic sex:	male + female						genetic sex:	male + female
test group	embryo no.	slice no.	values measured on slice [µm]					slice mean [µm]	embryo mean [µm]		test group	embryo no.	slice no.	measurements per slice [µm]					slice mean [µm]	embryo mean [µm]		test group	embryo no.	slice no.	slice mean [µm²]	slice mean [%]	embryo mean [%]		test group	embryo no.	left ovary [mm²]	right ovary [mm²]		test group	embryo no.	left testis [mm²]	right testis [mm²]		test group	∑ eggs	∑ infertilized eggs	∑ vital embryos	∑ mortal embryos	mortal embryos [%]		test group	∑ fertilized eggs	∑malformed embryos	∑ malformations
			1	2	3	4	5							1	2	3	4	5
untreated control	1	1	198.727	190.31	190.447	184.681	208.929	194.619	171.304		untreated control	1	1	14.264	12.836	16.25	13.34	11.219	13.5818	8.33502		untreated control	1	1	39328.4	28.9179	32.0483		untreated control	1	12.1	2.86		untreated control	1	5.77	4.77		untreated control	20	1	16	3	15.7895		untreated control	19	0	0
		2	170.418	175	203.046	152.007	176.849	175.464					2	6.152	8.207	5.27	5.069	5.803	6.1002					2	41517.6	30.5276				2	12.29	2.29			2	4.06	3.88		solvent control	17	1	9	7	43.75		solvent control	16	2	3
		3	196.317	171.83	177.437	175.646	171.247	178.495					3	5.848	6.719	8.047	7.512	6.374	6.9					3	44224	32.5176				3	13.29	2.12			3	3.83	3.52		0,1 µg tamoxifen/g egg	19	1	10	8	44.4444		0,1 µg tamoxifen/g egg	18	1
		4	145.729	158.467	158.644	154.473	119.655	147.394					4	7.096	6.522	7.512	9.939	9.807	8.1752					4	44257.9	32.5426				4	11.31	2.56			4	4.09	3.36		1 µg tamoxifen/g egg	19	5	8	6	42.8571		1 µg tamoxifen/g egg	14	0	0
		5	129.917	152.106	140.129	141.814	151.119	143.017					5	8.76	10.516	10.035	10.623	7.862	9.5592					5	44269.9	32.5514				5	8.27	1.57			5	3.17	2.6		10 µg tamoxifen/g egg	19	2	6	11	64.7059		10 µg tamoxifen/g egg	17	0	0
		6	177.984	186.333	183.443	171.954	170.565	178.056					6	7.096	8.498	8.302	8.186	7.683	7.953					6	48381.9	35.5749			solvent control	1	7.5	1.23			6	3.31	3.66
		7	162.297	165.718	193.524	160.002	214.911	179.29					7	6.731	7.096	6.264	7.193	8.437	7.1442					7	39733.2	29.2156				2	10.13	2.35			7	3.95	3.33
		8	164.81	192.848	191.547	202.267	197.872	189.869					8	7.12	8.015	6.719	8.946	6.194	7.3988					8	44017.8	32.366				3	7.86	1.87			8	4.13	4.39
		9	191.967	164.707	161.17	167.591	174.199	171.927					9	8.975	7.512	9.754	5.966	7.828	8.007					9	46293.9	34.0396			0,1 µg tamoxifen/g egg	1	10.83	2.13			9	4.27	3.65
		10	130.219	127.87	187.631	164.469	164.336	154.905					10	8.186	8.375	7.5	8.302	10.291	8.5308					10	43832.5	32.2298				2	11.22	1.82			10	3.09	3.05
	2	1	157.1	169.167	149.164	116.515	133.427	145.075	142.775			2	1	8.59	7.083	10.291	11.917	12.597	10.0956	9.07804			2	1	44412.2	32.656	33.3309			3	9.83	2.54			11	3.76	3.53
		2	131.762	124.169	126.678	131.429	158.649	134.537					2	10.35	10.937	10.647	12.43	9.138	10.7004					2	44069.3	32.4039				4	6.53	2.21		solvent control	1	2.29	2.16
		3	159.872	146.211	134.928	108.823	144.995	138.966					3	8.58	6.588	6.834	8.375	7.96	7.6674					3	53648.6	39.4475				5	10.1	3.55			2	3.79	3.25
		4	86.031	109.17	126.678	134.293	115.027	114.24					4	10.45	10.442	10.069	8.333	8.015	9.4618					4	40793.9	29.9955			1 µg tamoxifen/g egg	1	8.25	2.63			3	4.94	3.79
		5	149.745	158.649	154.473	149.727	128.293	148.177					5	9.138	11.733	10.623	11.335	12.535	11.0728					5	43244.9	31.7977				2	8.51	2.09			4	3.94	3.1
		6	138.283	127.285	117.432	114.17	120.905	123.615					6	8.946	9.317	7.512	7.683	9.176	8.5268					6	43508.5	31.9915				3	9.67	1.39			5	3.86	3.53
		7	149.761	143.877	148.347	137.823	135.741	143.11					7	5.221	5.667	4.167	6.509	6.25	5.5628					7	54245.5	39.8864				4	10.26	1.89			6	3.6	2.96
		8	151.22	166.669	161.187	139.692	129.435	149.641					8	11.524	12.964	12.083	6.509	7.083	10.0326					8	50882	37.4132				5	9.79	1.73		0,1 µg tamoxifen/g egg	1	3.79	2.76
		9	156.569	192.534	177.486	192.211	193.242	182.408					9	9.904	10.249	9.904	5.922	6.834	8.5626					9	38847	28.564			10 µg tamoxifen/g egg	1	3.46	1.54			2	4.25	3.14
		10	170.866	141.07	141.51	154.868	131.577	147.978					10	9.718	9.718	6.522	9.014	10.516	9.0976					10	39648.6	29.1534				2	5.97	1.53			3	4.04	3.06
	3	1	109.75	171.174	184.304	159.552	142.831	153.522	154.295			3	1	9.727	6.374	7.5	7.603	8.498	7.9404	7.90182			3	1	37699.9	27.7205	29.7198			3	4.72	1.53			4	4.2	2.57
		2	109.348	108.835	127.072	186.622	187.907	143.957					2	8.75	11.25	10	7.603	7.12	8.9446					2	33304.6	24.4887									5	-	3.21
		3	185.833	174.238	203.443	198.377	188.379	190.054					3	9.52	6.897	7.277	9.4	7.12	8.0428					3	45641.1	33.5596								1 µg tamoxifen/g egg	1	3.49	3.2
		4	180.123	180.002	205.083	214.181	220.835	200.045					4	7.193	10.905	10.078	7.512	7.096	8.5568					4	43260.9	31.8095									2	3.22	2.91
		5	99.757	142.149	130.836	195.343	146.858	142.989					5	9.167	7.928	9.592	9.223	6.468	8.4756					5	38968.9	28.6536									3	3.47	3.22
		6	183.685	153.607	124.178	186.149	192.707	168.065					6	8.437	7.512	7.906	7.383	6.588	7.5652					6	31850.7	23.4196								10 µg tamoxifen/g egg	1	3.97	2.9
		7	194.811	161.817	166.375	201.544	211.677	187.245					7	10.425	7.917	8.015	6.25	6.985	7.9184					7	39237.3	28.851									2	2.48	2.53
		8	111.418	124.348	122.114	112.623	113.437	116.788					8	5.433	4.167	6.152	7.928	5.48	5.832					8	42580.6	31.3093									3	3.57	2.77
		9	106.735	110.846	117.047	114.176	110.667	111.894					9	8.186	6.68	5.606	7.169	9.167	7.3616					9	48746.9	35.8433
		10	124.346	125.469	145.855	125.469	120.836	128.395					10	8.907	7.383	7.66	9.204	8.75	8.3808					10	42898.6	31.5431
	4	1	134.629	147.742	114.607	110.987	132.594	128.112	140.565			4	1	8.333	9.718	10.865	11.219	7.454	9.5178	9.12426			4	1	40913.8	30.0837	31.4032
		2	181.094	177.883	190.369	193.378	188.451	186.235					2	10.417	9.691	11.441	10.937	8.839	10.265					2	54133.2	39.8038
		3	139.921	134.177	143.103	163.335	130.389	142.185					3	10.291	10.249	9.148	9.52	10.172	9.876					3	36154.2	26.584
		4	122.602	105.912	121.866	131.69	122.571	120.928					4	11.219	13.084	9.014	10.035	8.858	10.442					4	41543.7	30.5468
		5	118.345	121.692	129.435	136.407	151.422	131.46					5	10.442	9.763	9.428	12.112	8.09	9.967					5	33628.7	24.727
		6	139.284	149.49	133.18	158.616	152.315	146.577					6	10.35	10.316	9.176	7.419	7.683	8.9888					6	41624.7	30.6064
		7	207.247	209.001	176.875	148.964	143.546	177.127					7	9.363	7.649	9.511	8.015	8.015	8.5106					7	47181	34.6919
		8	120.142	131.88	139.416	117.627	118.512	125.515					8	6.509	6.834	6.719	7.683	11	7.749					8	44164.7	32.474
		9	124.267	136.265	137.487	142.539	107.5	129.612					9	11.844	9.223	8.333	6.897	7.419	8.7432					9	44847.1	32.9758
		10	104.569	111.918	125.044	115.075	132.877	117.897					10	6.783	7.383	6.468	8.385	6.897	7.1832					10	42892.4	31.5385
	5	1	160.749	140.337	182.713	192.412	190.933	173.429	153.037			5	1	8.76	10.249	8.437	7.12	9.52	8.8172	8.0417			5	1	32920.3	24.2061	27.5927
		2	195.365	156.5	160.92	132.594	151.405	159.357					2	8.186	8.7	6.468	6.194	8.207	7.551					2	40045.9	29.4455
		3	139.692	101.246	113.192	178.216	168.401	140.149					3	8.437	7.512	8.975	10.078	8.59	8.7184					3	42432.7	31.2005
		4	122.066	118.697	138.949	142.014	139.384	132.222					4	5.848	6.935	5.667	6.667	6.468	6.317					4	36957.4	27.1746
		5	181.025	222.244	126.842	161.488	160.764	170.473					5	8.437	10.138	10.45	8.333	7.12	8.8956					5	35458.3	26.0723
		6	187.62	176.324	187.574	187.12	168.953	181.518					6	8.004	7.66	5.017	8.09	8.917	7.5376					6	41043.9	30.1793
		7	182.308	185.85	163.048	164.574	165.884	172.333					7	9.363	8.858	7.512	8.015	8.829	8.5154					7	34300.4	25.2209
		8	144.657	160.626	154.349	144.631	133.208	147.494					8	7.512	7.454	7.383	5.59	7.132	7.0142					8	38240	28.1176
		9	128.228	117.769	124.636	143.935	138.654	130.644					9	7.277	6.731	11.373	7.277	7.454	8.0224					9	38607.4	28.3878
		10	110.432	121.487	134.146	113.74	133.941	122.749					10	6.264	9.252	10.45	8.75	10.425	9.0282					10	35254.1	25.9221
solvent control	1	1	-	-	-	-	-	203.26	178.998			6	1	12.091	11.219	9.317	10.961	11.733	11.0642	9.06262			6	1	41392	30.4353	26.586
		2	-	-	-	-	-	238.46					2	9.501	10.017	10.249	10.68	10.68	10.2254					2	41194.7	30.2902
		3	-	-	-	-	-	188.4					3	9.727	8.907	10.841	8.975	6.719	9.0338					3	39085.6	28.7394
		4	-	-	-	-	-	134.74					4	8.975	8.907	9.665	5.667	7.512	8.1452					4	42313.4	31.1128
		5	-	-	-	-	-	140.86					5	9.1	10.291	9.363	7.683	8.79	9.0454					5	36735.7	27.0115
		6	-	-	-	-	-	163.38					6	8.004	8.858	8.59	6.834	4.714	7.4					6	33176.3	24.3943
		7	-	-	-	-	-	178.18					7	9.52	8.302	10.623	10.442	9.52	9.6814					7	33569.5	24.6835
		8	-	-	-	-	-	184.36					8	7.603	6.719	8.047	7.454	6.374	7.2394					8	35740.3	26.2796
		9	-	-	-	-	-	181.1					9	8.004	9.939	9.446	9.446	11.524	9.6718					9	31415.6	23.0997
		10	-	-	-	-	-	177.24					10	9.501	7.083	10.417	8.79	9.807	9.1196					10	26946.1	19.8133
	2	1	-	-	-	-	-	142.9	147.378			7	1	7.683	6.468	5.893	5.154	5.035	6.0466	7.20068			7	1	47393.8	34.8484	28.4087
		2	-	-	-	-	-	140.34					2	5.803	6.305	4.751	4.751	6.067	5.5354					2	33432.6	24.5828
		3	-	-	-	-	-	130.96					3	11.607	12.311	12.923	12.311	11	12.0304					3	39666.2	29.1663
		4	-	-	-	-	-	151					4	11.071	11.219	11.674	12.944	13.077	11.997					4	36353.6	26.7306
		5	-	-	-	-	-	167.58					5	4.35	3.436	4.167	4.602	6.374	4.5858					5	36390.3	26.7576
		6	-	-	-	-	-	159.28					6	6.872	6.067	9.223	7.784	5.559	7.101					6	37838.3	27.8223
		7	-	-	-	-	-	121.06					7	6.783	7.96	6.25	5	5.017	6.202					7	46216.2	33.9825
		8	-	-	-	-	-	148.44					8	4.29	4.877	5.966	4.751	5.221	5.021					8	37939.6	27.8968
		9	-	-	-	-	-	153.58					9	6.719	8.59	9.4	8.09	6.264	7.8126					9	39203.8	28.8263
		10	-	-	-	-	-	158.64					10	4.751	4.658	4.751	7.083	7.132	5.675					10	31923.5	23.4732
	3	1	-	-	-	-	-	132.9	145.256			8	1	6.194	6.36	5.803	5.417	5.433	5.8414	7.11252			8	1	26665.1	19.6067	28.7334
		2	-	-	-	-	-	127.82					2	7.277	7.12	5.559	3.359	2.917	5.2464					2	48543.9	35.694
		3	-	-	-	-	-	119.64					3	3.841	6.374	6.374	5.893	6.374	5.7712					3	38297.8	28.1601
		4	-	-	-	-	-	234.16					4	8.76	7.649	9.138	5.59	6.985	7.6244					4	47179.9	34.6911
		5	-	-	-	-	-	-					5	7.683	7.683	7.289	6.897	7.649	7.4402					5	33902	24.9279
		6	-	-	-	-	-	144.42					6	10.753	7.828	7.289	5.966	9.014	8.17					6	36971	27.1846
		7	-	-	-	-	-	137.6					7	8.975	9.4	10	8.344	12.937	9.9312					7	42561.9	31.2955
		8	-	-	-	-	-	157.24					8	6.985	6.588	6.346	6.985	5.035	6.3878					8	36400	26.7647
		9	-	-	-	-	-	123.22					9	8.839	9.1	9.176	8.09	9.665	8.974					9	45482.6	33.4431
		10	-	-	-	-	-	130.3					10	4.658	5.221	5.069	7.277	6.468	5.7386					10	34770.7	25.5667
0,1 µg tamoxifen/g egg	1	1	139.463	131.543	113.094	109.195	103.458	119.351	107.382			9	1	9.727	9.363	8.218	6.935	8.946	8.6378	9.67038			9	1	36233.8	26.6425	28.9636
		2	123.167	121.761	82.706	99.167	82.504	101.861					2	15.506	14.512	13.75	14.607	11.441	13.9632					2	34568.9	25.4183
		3	136.232	109.348	96.957	95.179	98.39	107.221					3	8.09	9.904	8.207	8.218	9.363	8.7564					3	29548.3	21.7267
		4	93.868	92.976	110.818	102.12	76.531	95.2626					4	8.907	10.069	11.763	9.363	9.014	9.8232					4	43088.8	31.6829
		5	69.292	92.953	109.484	93.96	96.989	92.5356					5	7.512	8.58	6.25	12.148	11.211	9.1402					5	43057.3	31.6598
		6	113.214	90.435	126.321	122.939	93.408	109.263					6	6.588	8.59	8.385	6.783	9.138	7.8968					6	46665	34.3125
		7	121.875	153.48	146.783	109.551	125.637	131.465					7	10.291	10.753	11.18	11.577	9.939	10.748					7	43333.2	31.8626
		8	125.858	129.492	112.206	105.31	122.76	119.125					8	6.522	6.719	6.667	6.985	9.727	7.324					8	37591.1	27.6405
		9	95.441	98.153	83.906	138.734	104.127	104.072					9	8.25	8.004	8.59	7.383	7.083	7.862					9	33837.9	24.8808
		10	67.211	115.932	129.77	93.169	62.255	93.6674					10	14.006	11.219	12.112	12.507	12.917	12.5522					10	45980.6	33.8093
	2	1	146.735	93.039	96.875	120.465	129.532	117.329	108.085			10	1	10.172	8.385	7.383	9.176	9.138	8.8508	8.50424			10	1	39525.4	29.0628	24.2742
		2	97.582	117.925	100.253	103.99	96.914	103.333					2	6.719	7.862	7.372	7.784	7.66	7.4794					2	31623.6	23.2526
		3	109.624	120.168	109.671	103.206	103.605	109.255					3	10.425	6.509	6.009	6.783	11.524	8.25					3	42670.6	31.3754
		4	108.106	100.201	100.733	99.041	110.003	103.617					4	10.607	10.417	8.25	10.308	8.375	9.5914					4	39849.7	29.3012
		5	75.833	68.379	66.667	77.5	57.276	69.131					5	11.032	6.68	4.488	6.783	9.363	7.6692					5	2889.8	2.12485
		6	130.096	155.056	187.203	183.049	166.594	164.4					6	9.223	8.917	8.207	6.152	7.454	7.9906					6	34437.2	25.3215
		7	184.235	177.5	183.759	133.998	86.039	153.106					7	9.167	7.603	9.592	7.917	8.76	8.6078					7	32981.2	24.2509
		8	0	0	104.818	133.013	171.353	81.8368					8	8.76	11.555	9.138	8.67	9.939	9.6124					8	40061.7	29.4571
		9	100.919	133.375	171.739	0	84.5	98.1066					9	7.512	8.79	11	5.893	10.138	8.6666					9	29332.8	21.5682
		10	0	0	138.268	170.345	95.058	80.7342					10	8.437	7.277	10.017	6.667	9.223	8.3242					10	36756.5	27.0268
	3	1	152.612	131.215	154.311	155.081	143.626	147.369	120.304			11	1	6.935	6.25	6.509	9.363	8.437	7.4988	9.25154			11	1	37988.3	27.9326	23.3295
		2	131.677	117.512	106.161	120.649	111.657	117.531					2	7.454	7.512	7.828	8.385	6.731	7.582					2	33048.7	24.3005
		3	132.23	130.237	131.352	129.62	98.633	124.414					3	8.975	10.291	9.014	12.367	13.34	10.7974					3	30042.7	22.0902
		4	102.147	121.269	116.025	144.722	140.428	124.918					4	8.09	10.291	9.619	8.344	8.975	9.0638					4	23532.1	17.303
		5	82.605	90.189	117.094	142.373	135.741	113.6					5	10.138	10.623	8.302	8.09	6.731	8.7768					5	34787.3	25.5789
		6	127.366	119.501	116.872	82.769	60.283	101.358					6	11.785	9.363	7.454	10.865	10.516	9.9966					6	34204.4	25.1503
		7	135.229	153.136	166.208	168.135	150.231	154.588					7	9.317	7.828	9.252	11.38	9.4	9.4354					7	34672.9	25.4948
		8	42.197	100.423	84.43	128.479	128.941	96.894					8	13.668	11.585	10.905	10.017	13.084	11.8518					8	28413.7	20.8924
		9	69.412	78.12	97.418	110.318	149.873	101.028					9	8.047	8.047	7.784	7.906	8.207	7.9982					9	24581	18.0743
		10	100.557	68.521	135.082	158.388	144.138	121.337					10	9.176	8.829	8.047	11.071	10.45	9.5146					10	36010.2	26.4781
	4	1	113.168	119.17	114.413	93.005	111.536	110.258	73.0952		solvent control	1	1	7.5	7.683	8.59	9.138	7.96	8.1742	8.18312		solvent control	1	1	42728.3	31.4179	31.37
		2	0	0	0	0	0	0					2	9.754	8.047	8.917	5.433	8.25	8.0802					2	42954.3	31.584
		3	0	0	0	0	0	0					3	7.862	7.512	7.454	8.59	9.501	8.1838					3	40876.4	30.0562
		4	110.955	102.157	119.91	100.64	87.599	104.252					4	8.67	8.58	5.789	5.433	10.138	7.722					4	35193.2	25.8774
		5	124.569	157.167	161.817	134.177	124.869	140.52					5	10.417	6.25	8.59	6.935	8.207	8.0798					5	35977.3	26.4539
		6	0	0	0	0	0	0					6	7.917	6.305	9.176	6.588	9.428	7.8828					6	36618.3	26.9252
		7	0	0	0	0	0	0					7	5.27	7.828	5.922	7.66	5.336	6.4032					7	47265.4	34.754
		8	135.01	135.728	112.052	110.695	125.966	123.89					8	9.904	8.59	8.271	9.592	12.169	9.7052					8	45256.3	33.2767
		9	139.009	103.619	116.649	123.898	104.007	117.436					9	6.897	6.935	9.878	9.252	8.59	8.3104					9	46330.4	34.0665
		10	158.983	129.658	153.716	113.066	117.55	134.595					10	7.454	9.363	8.09	10.017	11.524	9.2896					10	53431.6	39.2879
	5	1	156.154	157.502	163.692	169.517	161.469	161.667	150.243			2	1	12.148	10.647	11.524	14.167	10.905	11.8782	8.46882			2	1	38979.5	28.6614	27.6877
		2	129.492	131.048	105.03	111.977	112.996	118.109					2	5.922	10.035	8.385	9.718	9.428	8.6976					2	42019.5	30.8967
		3	140.337	158.487	140.064	138.245	168.278	149.082					3	8.995	9.511	5.789	7.66	8.59	8.109					3	37234.9	27.3786
		4	156.014	156.103	166.937	173.471	165.607	163.626					4	7.277	8.207	8.829	9.252	7.419	8.1968					4	36683	26.9728
		5	144.458	161.841	156.888	147.509	141.033	150.346					5	9.904	11.071	9.878	7.512	9.691	9.6112					5	32584.7	23.9593
		6	181.018	146.154	144.708	146.052	144.861	152.559					6	6.374	5.48	4.167	8.207	7.277	6.301					6	42146.6	30.9901
		7	139.289	148.251	139.608	156.846	142.459	145.291					7	5.59	6.152	4.602	4.602	6.264	5.442					7	40021.9	29.4279
		8	148.859	155.914	152.536	187.517	164.422	161.85					8	9.807	12.863	6.985	7.75	7.66	9.013					8	36223.5	26.6349
		9	163.437	158.552	143.626	146.121	157.1	153.767					9	8.385	9.763	10.937	6.588	13.017	9.738					9	33742.9	24.811
		10	138.494	142.019	143.343	151.751	155.065	146.134					10	7.193	9.363	6.522	7.917	7.512	7.7014					10	36916	27.1441
1 µg tamoxifen/g egg	1	1	142.051	126.658	159.489	158.765	100.028	137.398	74.4345			3	1	8.917	12.672	11.095	10.417	9.834	10.587	10.2374			3	1	42606.8	31.3285	29.7028
		2	119.586	132.817	125.178	129.11	118.992	125.137					2	9.317	10.45	12.782	11.373	6.783	10.141					2	36162.4	26.59
		3	118.852	140.064	125.394	131.286	134.686	130.056					3	12.672	8.59	11	12.7	9.939	10.9802					3	33952.5	24.9651
		4	137.903	125.255	128.574	137.164	159.541	137.687					4	8.015	8.946	8.79	14.44	14.222	10.8826					4	38756.8	28.4976
		5	115.617	132.427	117.026	131.154	140.357	127.316					5	7.683	7.071	7.096	9.446	8.333	7.9258					5	45863.2	33.7229
		6	0	0	0	0	0	0					6	8.333	8.917	8.858	5.789	7.372	7.8538					6	38408.7	28.2417
		7	0	0	0	0	0	0					7	10.017	12.944	10.078	11.577	8.047	10.5326					7	38847.7	28.5645
		8	0	0	0	0	0	0					8	10.442	12.169	14.154	14.936	15.422	13.4246					8	47262.1	34.7515
		9	67.34	63.421	98.365	100.125	104.499	86.75					9	8.7	9.252	9.223	9.904	10.086	9.433					9	42133	30.9801
		10	0	0	0	0	0	0					10	11.464	11.441	9.223	9.619	11.319	10.6132					10	39964.9	29.386
	2	1	80.554	92.905	139.416	112.361	123.209	109.689	103.323			4	1	8.333	8.375	6.783	10.069	8.67	8.446	10.5449			4	1	33697.6	24.7776	26.418
		2	281.2	280.25	586.079	527.738	496.253	434.304					2	13.34	16.594	14.512	13.288	14.222	14.3912					2	46983.7	34.5468
		3	0	0	0	0	0	0					3	9.176	10.817	9.4	6.588	9.317	9.0596					3	36276.4	26.6738
		4	96.292	102.973	132.08	107.458	136.079	114.976					4	8.437	10.623	11.524	10.069	11.939	10.5184					4	46896	34.4824
		5	0	0	0	0	119.062	23.8124					5	12.148	10.146	10.68	11.585	8.271	10.566					5	36790.8	27.0521
		6	0	0	0	107.616	123.404	46.204					6	8.858	10.316	12.754	10.516	7.683	10.0254					6	23894.5	17.5695
		7	0	0	0	0	0	0					7	8.67	8.975	15.839	17.25	15.91	13.3288					7	25202.6	18.5313
		8	118.533	126.724	73.182	47.376	47.383	82.6396					8	8.7	8.015	7.083	7.512	10.215	8.305					8	39976.5	29.3945
		9	174.811	231.434	232.183	215.593	195.253	209.855					9	11.464	9.834	11.258	9.446	10.291	10.4586					9	35832.2	26.3472
		10	56.875	0	1.863	0	0	11.7476					10	13.623	9.363	9.501	11.25	8.015	10.3504					10	33734.7	24.8049
	3	1	87.066	109.624	124.304	105.013	124.569	110.115	61.2347			5	1	11.524	11.524	12.836	13.756	11.585	12.245	10.7414			5	1	36209.8	26.6249	31.6393
		2	0	0	0	0	0	0					2	12.964	11.095	10.809	10.68	11.219	11.3534					2	39590.1	29.1104
		3	0	29.357	61.869	108.794	125.767	65.1574					3	12.374	7.96	8.549	9.727	10.316	9.7852					3	37065.6	27.2541
		4	105.843	114.179	114.17	110.013	125.044	113.85					4	11.008	10.905	7.512	9.904	9.592	9.7842					4	41885.6	30.7982
		5	0	0	0	0	0	0					5	13.392	11.258	10.712	10.937	13.45	11.9498					5	43056.7	31.6593
		6	0	0	0	0	0	0					6	10.45	11.258	10.425	9.904	11.008	10.609					6	57484	42.2676
		7	78.302	81.091	83.108	99.041	88.671	86.0426					7	9.727	10.607	11.258	12.112	10.623	10.8654					7	43177.2	31.7479
		8	89.357	87.896	86.991	90.096	137.523	98.3726					8	11.844	10.672	12.019	11	9.138	10.9346					8	44664.2	32.8413
		9	128.531	131.743	138.245	149.838	145.69	138.809					9	8.76	7.862	10.623	9.317	10.905	9.4934					9	47422	34.8691
		10	0	0	0	0	0	0					10	11.008	11.441	10.45	8.207	10.865	10.3942					10	39739.6	29.2203
	4	1	136.04	111.408	134.291	146.676	147.921	135.267	135.198			6	1	8.004	8.385	8.58	9.939	8.917	8.765	8.82576			6	1	48119.5	35.382	34.0289
		2	157.938	148.609	135.611	132.628	139.144	142.786					2	5.803	8.047	6.522	8.333	8.344	7.4098					2	51277.7	37.7042
		3	164.834	156.961	140.183	130.538	154.547	149.413					3	10.291	11	9.718	9.592	8.302	9.7806					3	49317.5	36.2629
		4	129.368	129.113	130.815	124.197	94.535	121.606					4	9.511	11.258	9.878	8.917	8.76	9.6648					4	51362	37.7662
		5	127.009	134.05	142.41	123.209	131.352	131.606					5	9.834	9.317	9.148	9.138	7.906	9.0686					5	47222.5	34.7224
		6	167.22	172.84	175.519	162.944	166.504	169.005					6	10.937	10.035	9.446	8.09	9.176	9.5368					6	44380.7	32.6329
		7	133.77	138.336	144.811	142.773	142.926	140.523					7	7.649	8.58	9.363	7.96	8.271	8.3646					7	46918.6	34.499
		8	126.007	136.04	91.234	96.354	118.562	113.639					8	9.727	8.344	7.096	7.66	5.848	7.735					8	44386.7	32.6373
		9	119.082	136.486	117.945	128.358	141.728	128.72					9	7.289	9.511	7.5	8.218	9.592	8.422					9	38993.3	28.6715
		10	125.842	121.301	104.937	112.559	132.448	119.417					10	8.839	8.58	10.905	9.501	9.727	9.5104					10	40815	30.011
	5	1	164.074	161.012	157.041	179.463	191.161	170.55	93.5886		0,1 µg tamoxifen/g egg	1	1	10.45	11.18	10.249	7.083	7.66	9.3244	7.63424		0,1 µg tamoxifen/g egg	1	1	39188.7	28.8152	28.3061
		2	120.393	137.116	92.064	68.971	74.466	98.602					2	5.417	6.719	4.658	6.194	5.667	5.731					2	37051.2	27.2435
		3	0	56.667	0	101.916	98.326	51.3818					3	12.304	12.148	11.939	9.148	11.741	11.456					3	36689.9	26.9779
		4	201.467	210.041	206.742	217.276	201.694	207.444					4	8.207	7.454	6.719	6.009	7.169	7.1116					4	41040.3	30.1767
		5	154.742	135.023	163.44	139.329	158.662	150.239					5	9.148	8.004	7.289	7.372	6.783	7.7192					5	33434.2	24.584
		6	0	0	65.325	0	0	13.065					6	7.862	8.218	10.172	4.751	5.789	7.3584					6	45338	33.3368
		7	0	0	0	0	0	0					7	8.218	7.083	5.559	6.374	6.522	6.7512					7	40631.3	29.876
		8	147.007	132.762	132.23	101.711	129.384	128.619					8	7.906	7.083	6.522	6.36	7.289	7.032					8	36876.5	27.1151
		9	113.358	120.669	102.334	132.898	110.667	115.985					9	8.218	8.58	6.36	7.419	8.437	7.8028					9	40953	30.1125
		10	0	0	0	0	0	0					10	5.336	6.194	5.017	6.36	7.372	6.0558					10	33759.6	24.8232
10 µg tamoxifen/g egg	1	1	0	0	0	106.043	163.44	53.8966	49.0161			2	1	7.083	7.083	8.218	7.454	7.096	7.3868	7.62868			2	1	41302.1	30.3692	28.5292
		2	0	0	0	0	119.315	23.863					2	6.152	7.083	5.417	7.512	6.588	6.5504					2	41914.8	30.8197
		3	0	0	0	0	0	0					3	11	8.917	11.585	10.865	9.252	10.3238					3	33863	24.8993
		4	162.703	178.553	198.776	169.71	166.76	175.3					4	6.009	5.606	5.606	6.25	7.419	6.178					4	39680.9	29.1771
		5	0	0	0	0	0	0					5	7.512	8.67	6.834	6.935	7.512	7.4926					5	39895.2	29.3347
		6	0	0	77.177	109.915	150.785	67.5754					6	5.803	9.1	7.66	8.015	8.218	7.7592					6	37573.8	27.6278
		7	104.31	176.896	194.954	202.885	168.583	169.526					7	8.09	6.509	7.96	8.839	7.372	7.754					7	34526.6	25.3872
		8	0	0	0	0	0	0					8	5.559	4.187	7.383	7.383	7.277	6.3578					8	38485.6	28.2982
		9	0	0	0	0	0	0					9	8.271	10.146	7.383	6.588	7.512	7.98					9	44228.7	32.5211
		10	0	0	0	0	0	0					10	8.829	7.277	7.454	8.67	10.291	8.5042					10	36526.6	26.8578
	2	1	102.242	105.017	145.538	140.089	136.707	125.919	87.8577			3	1	8.015	7.512	8.58	6.935	8.004	7.8092	8.44177			3	1	39825.1	29.2832	25.7867
		2	0	0	0	0	0	0					2	10.291	8.59	7.096	7.683	8.67	8.466					2	38106.3	28.0193
		3	134.477	159.809	134.951	117.972	135	136.442					3	4.658	6.194	9.754	10.138	9.1	7.9688					3	40344.7	29.6652
		4	0	0	0	0	0	0					4	7.862	8.946	5.59	6.194	6.897	7.0978					4	39983.5	29.3996
		5	194.052	211.629	216.955	210.86	159.8	198.659					5	9.446	10.35	10.937	10.291	9.511	10.107					5	28706.1	21.1074
		6	0	0	0	2.635	0	0.527					6	8.858	8.333	10.35	9.763	10.35	9.5308					6	25723.1	18.914
		7	143.394	136.758	106.667	133.344	168.682	137.769					7	8.271	8.917	6.482	9.428	7.071	8.0338					7	35649	26.2125
		8	183.364	0	0	0	0	36.6728					8	8.385	8.333	9.592	6.783	9.511	8.5208					8	38174.3	28.0693
		9	110.432	93.132	100.585	119.876	139.476	112.7					9	-	-	-	-	-	-					9	35394.2	26.0251
		10	146.489	132.112	119.213	129.024	122.602	129.888					10	-	-	-	-	-	-					10	28792.4	21.1709
	3	1	0	0	1.667	0	0	0.3334	0.27978			4	1	8.344	6.667	10.841	9.204	6.305	8.2722	8.2974			4	1	35487.5	26.0938	29.622
		2	0	0	0	0	0	0					2	9.501	11.008	9.691	8.207	9.501	9.5816					2	50093.2	36.8332
		3	0	0	0	0	0	0					3	8.79	7.603	8.09	9.619	9.167	8.6538					3	36275.3	26.673
		4	0	9.317	0	0	0	1.8634					4	7.917	6.719	9.138	7.419	9.446	8.1278					4	50674.1	37.2604
		5	0	0	0	0	0	0					5	6.25	5.833	7.193	6.985	9.252	7.1026					5	44406.9	32.6521
		6	0	0	0	0	0	0					6	6.468	6.985	6.305	6.305	8.375	6.8876					6	36101.7	26.5454
		7	0	0	0	3.005	0	0.601					7	9.167	7.5	7.96	9.204	10.417	8.8496					7	37604.2	27.6501
		8	0	0	0	0	0	0					8	7.784	7.683	10.078	8.59	7.277	8.2824					8	33848.3	24.8885
		9	0	0	0	0	0	0					9	9.1	8.302	6.985	7.603	8.76	8.15					9	37614.4	27.6576
		10	0	0	0	0	0	0					10	9.252	8.09	8.344	8.829	10.817	9.0664					10	40753.8	29.966
	4	1	76.929	92.293	91.477	83.749	77.54	84.3976	80.085			5	1	9.428	9.592	9.138	8.333	9.428	9.1838	8.0557			5	1	29410.6	21.6254	25.089
		2	142.158	165.691	162.181	189.921	179.167	167.824					2	7.419	6.834	6.834	6.509	6.509	6.821					2	36591	26.9051
		3	0	6.872	0	0	0	1.3744					3	12.507	6.834	7.169	8.549	8.858	8.7834					3	23836.7	17.527
		4	87.718	89.726	87.242	80.039	101.605	89.266					4	7.96	6.152	5.667	8.549	5.017	6.669					4	25765.2	18.945
		5	78.351	82.567	71.841	101.328	160.887	98.9948					5	6.36	8.271	8.917	9.501	9.763	8.5624					5	27989	20.5801
		6	0	0	0	3.436	0	0.6872					6	9.317	8.333	8.67	7.96	9.014	8.6588					6	35331.2	25.9788
		7	90.189	80.385	79.6	59.658	73.433	76.653					7	5.922	7.419	7.66	7.512	7.96	7.2946					7	36684.4	26.9738
		8	117.512	114.467	105.399	103.175	117.106	111.532					8	10.937	5.667	6.731	7.383	7.12	7.5676					8	42906	31.5485
		9	54.55	67.464	92.203	75.356	107.011	79.3168					9	10.809	8.186	10.146	8.302	8.385	9.1656					9	43772.5	32.1857
		10	76.707	88.6	89.077	78.005	121.635	90.8048					10	7.096	9.014	8.09	8.271	6.783	7.8508					10	38924.3	28.6208
											1 µg tamoxifen/g egg	1	1	7.289	8.333	9.363	9.691	8.437	8.6226	7.78174		1 µg tamoxifen/g egg	1	1	37280.6	27.4122	31.6922
													2	8.333	8.946	8.015	9.317	7.454	8.413					2	37806.4	27.7988
													3	9.223	6.067	6.731	9.223	8.427	7.9342					3	41535.8	30.541
													4	6.588	9.1	7.454	6.731	7.277	7.43					4	41973.5	30.8629
													5	11.008	8.79	6.834	8.7	6.667	8.3998					5	44672.4	32.8474
													6	7.383	6.25	6.509	5.922	6.009	6.4146					6	50500.8	37.1329
													7	8.437	9.138	8.385	7.454	7.277	8.1382					7	41184.7	30.2829
													8	6.194	7.512	8.333	8.437	6.897	7.4746					8	45111.4	33.1701
													9	8.59	8.7	7.928	6.374	7.512	7.8208					9	41160.8	30.2653
													10	5.035	6.346	7.512	8.375	8.58	7.1696					10	49787.1	36.6082
												2	1	9.446	6.588	8.004	9.501	6.36	7.9798	8.79432			2	1	48593	35.7301	31.9991
													2	8.333	8.67	6.009	9.904	12.672	9.1176					2	38194.1	28.0839
													3	9.904	7.454	9.878	11	9.148	9.4768					3	47641.6	35.0306
													4	7.603	9.4	9.754	9.878	12.87	9.901					4	36212.9	26.6271
													5	7.649	9.501	8.271	11.441	8.437	9.0598					5	37645.6	27.6806
													6	8.375	8.344	8.375	7.784	8.858	8.3472					6	40374.6	29.6872
													7	13.463	8.76	7.66	7.512	10.308	9.5406					7	53110.8	39.0521
													8	10.833	7.289	8.79	8.59	9.138	8.928					8	39698.9	29.1904
													9	8.58	6.509	7.096	9.252	9.252	8.1378					9	55429.6	40.7571
													10	8.437	5.966	6.897	8.59	7.383	7.4546					10	38286.7	28.152
												3	1	12.72	11.763	12.134	11.441	10.45	11.7016	9.92528		10 µg tamoxifen/g egg	1	1	40031.2	29.4347	26.6992
													2	10.68	9.317	8.549	10.249	8.437	9.4464					2	32682.9	24.0315
													3	7.96	6.194	8.004	6.935	8.218	7.4622					3	36974.1	27.1868
													4	9.363	8.917	8.58	10.069	8.829	9.1516					4	40635.2	29.8788
													5	11.219	11.095	10.172	13.521	12.977	11.7968					5	33369.7	24.5365
													6	9.501	8.58	8.047	6.509	7.419	8.0112					6	36866.7	27.1079
													7	9.834	10.417	12.388	9.148	10.172	10.3918					7	30827.5	22.6673
													8	15.104	10.623	12.112	8.207	6.719	10.553					8	37551	27.611
													9	11	10.865	12.019	10.078	8.09	10.4104					9	33933.2	24.9509
													10	8.59	10.078	14.367	9.4	9.204	10.3278					10	40238.2	29.5869
											10 µg tamoxifen/g egg	1	1	9.727	5.667	7.372	8.437	7.66	7.7726	9.36398			2	1	46296.2	34.0413	31.2646
													2	9.727	8.907	8.218	10.078	6.985	8.783					2	57000.6	41.9122
													3	6.25	6.897	7.132	6.194	7.96	6.8866					3	63527.3	46.7112
													4	4.859	5.667	7.419	6.25	6.897	6.2184					4	44837.6	32.9688
													5	18.305	15.97	15.866	14.367	15.685	16.0386					5	31010.8	22.8021
													6	7.603	7.512	8.302	9.807	8.59	8.3628					6	38316.1	28.1736
													7	8.76	9.619	8.427	7.512	9.592	8.782					7	37891.7	27.8615
													8	10.549	8.76	7.512	10.138	10.905	9.5728					8	37544.9	27.6065
													9	9.176	9.167	12.507	11.733	9.501	10.4168					9	38840.6	28.5593
													10	11.38	10.623	9.52	10.417	12.091	10.8062					10	29933.3	22.0098
[truncated: 10 more columns]

## Sheet: tamoxifen experiment no. 3
substance:	tamoxifen										substance:	tamoxifen										substance:	tamoxifen						substance:	tamoxifen				substance:	tamoxifen				substance:	tamoxifen						substance:	tamoxifen
experiment no.:	3										experiment no.:	3										experiment no.:	3						experiment no.:	3				experiment no.:	3				experiment no.:	3						experiment no.:	3
endpoint:	cortex thickness [µm]										endpoint:	cortex thickness [µm]										endpoint:	seminiferous tubules [%]		total area of picture=	136000	µm² = 100%		endpoint:	gonad surface area [mm²]				endpoint:	gonad surface area [mm²]				endpoint:	mortality [%]						endpoint:	malformations
genetic sex:	female										genetic sex:	male										genetic sex:	male						genetic sex:	female				genetic sex:	male				genetic sex:	male + female						genetic sex:	male + female
test group	embryo no.	slice no.	values measured on slice [µm]					slice mean [µm]	embryo mean [µm]		test group	embryo no.	slice no.	measurements per slice [µm]					slice mean [µm]	embryo mean [µm]		test group	embryo no.	slice no.	slice mean [µm²]	slice mean [%]	embryo mean [%]		test group	embryo no.	left ovary [mm²]	right ovary [mm²]		test group	embryo no.	left testis [mm²]	right testis [mm²]		test group	∑ eggs	∑ infertilized eggs	∑ vital embryos	∑ mortal embryos	mortal embryos [%]		test group	∑ fertilized eggs	∑malformed embryos	∑ malformations
			1	2	3	4	5							1	2	3	4	5
untreated control	1	1	149.56	130.963	129.177	106.696	110.862	125.452	167.318		untreated control	1	1	6.667	7.383	6.482	9.176	7.277	7.397	8.48548		untreated control	1	1	35661.4	26.2216	31.0642		untreated control	1	10.4886	3		untreated control	1	4.94	4.33		untreated control	28	3	25	0	0		untreated control	25	0	0
		2	171.472	209.248	174.456	157.729	191.402	180.861					2	7.372	7.372	5.893	6.935	8.79	7.2724					2	40824	30.0176				2	11.7043	3.36			2	4.76	4.4		solvent control	28	3	18	7	28		solvent control	25	1	1
		3	241.133	218.74	188.461	205.24	185.21	207.757					3	10.607	10.865	9.939	8.76	9.317	9.8976					3	40362.5	29.6783				3	10.3142	1.8			3	3.69	4.08		0,1 µg tamoxifen/g egg	28	3	15	10	40		0,1 µg tamoxifen/g egg	25	1	1
		4	145.843	136.677	97.557	134.177	123.471	127.545					4	7.372	6.194	5.922	7.096	5.221	6.361					4	44847	32.9757				4	11.0017	2.33			4	4.78	4.31		1 µg tamoxifen/g egg	28	4	14	10	41.6667		1 µg tamoxifen/g egg	24	1	1
		5	137.662	139.169	138.333	125	117.503	131.533					5	7.372	8.207	7.917	7.917	7.649	7.8124					5	41249.2	30.3303				5	9.85708	2.09			5	3.61	3.3		10 µg tamoxifen/g egg	28	5	9	14	60.8696		10 µg tamoxifen/g egg	23	1	multiple
		6	249.885	211.208	192.305	194.938	181.418	205.951					6	11.696	12.672	13.34	10	11.032	11.748					6	44703.2	32.87				6	8.89515	2.29			6	4.75	3.85		20 ng EE2/g egg	15	0	11	4	26.6667		20 ng EE2/g egg	15	1	1
		7	186.376	173.783	189.795	181.219	154.434	177.121					7	8.59	8.76	9.1	6.588	6.667	7.941					7	44744.4	32.9003				7	8.7877	1.81			7	3.61	3.54		0,1 µg tamoxifen/g egg + 20 ng EE2/g egg	15	1	8	6	42.8571		0,1 µg tamoxifen/g egg + 20 ng EE2/g egg	14	0	0
		8	175.075	169.579	152.491	165.248	184.127	169.304					8	12.083	11.118	7.132	10.417	9.665	10.083					8	47576.7	34.9829				8	9.71877	2.39			8	4.21	3.48		1 µg tamoxifen/g egg + 20 ng EE2/g egg	15	0	5	10	66.6667		1 µg tamoxifen/g egg + 20 ng EE2/g egg	15	0	0
		9	187.833	199.418	155.443	172.924	178.312	178.786					9	7.277	9.592	8.58	8.015	9.878	8.6684					9	39859.4	29.3084				9	8.95962	1.35			9	4.06	-		10 µg tamoxifen/g egg + 20 ng EE2/g egg	15	1	8	6	42.8571		10 µg tamoxifen/g egg + 20 ng EE2/g egg	14	0	0
		10	224.762	166.602	138.266	144.244	170.461	168.867					10	7.193	6.719	7.096	8.186	9.176	7.674					10	42645.2	31.3568				10	11.2091	2.31		solvent control	1	4.78	4.95
	2	1	161.081	171.061	178.973	174.491	142.831	165.687	176.163			2	1	7.096	7.906	6.719	7.132	6.667	7.104	8.61422			2	1	40571	29.8316	28.0533			11	10.2509	2.52			2	2.95	2.42
		2	167.22	203.978	198.51	193.069	176.486	187.853					2	7.828	5.803	5.069	6.264	6.25	6.2428					2	28030.4	20.6106				12	10.8331	2.46			3	3.51	3.82
		3	218.824	170.693	156.294	162.023	216.527	184.872					3	8.09	7.928	8.207	8.437	8.333	8.199					3	31274.8	22.9962				13	12.6745	2.13			4	4.35	3.84
		4	182.73	180.069	164.541	192.03	174.071	178.688					4	9.718	11.211	9.428	7.372	7.96	9.1378					4	70117.4	51.5569				14	8.01688	2.4			5	4.05	3.35
		5	158.782	152.069	198.727	194.426	183.494	177.5					5	6.985	9.204	8.333	7.132	5.017	7.3342					5	25969.1	19.0949				15	8.64805	1.88			6	3.77	3.29
		6	165.773	143.178	138.047	143.674	174.143	152.963					6	11	10.45	12.672	8.67	9.428	10.444					6	36152.5	26.5827				16	10.7524	2.8			7	4.81	4.3
		7	215.052	175.646	138.245	167.757	158.905	171.121					7	10.623	9.939	8.58	8.09	8.437	9.1338					7	35031.8	25.7587			solvent control	1	10.06	2.37			8	4.03	3.68
		8	208.713	201.581	153.109	162.594	181.414	181.482					8	12.562	8.995	11.733	9.176	11.38	10.7692					8	38073	27.9949				2	11.34	2.57			9	2.87	2.52
		9	171.353	182.622	151.751	173.961	217.372	179.412					9	9.317	8.76	8.839	9.317	8.344	8.9154					9	-	-				3	10.02	2.87			10	4.54	3.94
		10	175.634	194.64	174.682	172.357	192.945	182.052					10	8.207	10.146	9.317	9.363	7.277	8.862					10	-	-				4	10.75	2.04		0,1 µg tamoxifen/g egg	1	4.54	3.95
	3	1	155.036	153.247	157.896	148.721	178.911	158.762	161.318			3	1	10.623	12.148	13.242	10.541	10.623	11.4354	7.84538			3	1	37752.3	27.759	23.619			5	8.02	2.42			2	4.93	3.55
		2	170.461	166.235	160.02	158.824	159.698	163.048					2	7.683	7.083	8.59	5.48	9.4	7.6472					2	26815.9	19.7176				6	10.13	2.16			3	4.26	3.75
		3	148.56	178.475	171.857	221.912	205.714	185.304					3	9.691	11.763	10.809	12.112	11.763	11.2276					3	35971.6	26.4497				7	10.02	1.5			4	4.22	3.36
		4	159.591	143.178	141.483	161.525	178.701	156.896					4	7.512	5.433	5.893	7.289	6.719	6.5692					4	33173.2	24.3921				8	9.3	2.97			5	4.81	4.1
		5	142.743	140.064	167.9	160.641	145.929	151.455					5	8.79	7.419	6.152	7.683	7.862	7.5812					5	27188.9	19.9918			0,1 µg tamoxifen/g egg	1	9.67066	2.32		1 µg tamoxifen/g egg	1	4.35	3.73
		6	155.286	187.735	186.477	167.141	180.902	175.508					6	4.602	3.773	6.067	7.383	7.289	5.8228					6	27434	20.1721				2	9.45873	2.41			2	4.97	4.19
		7	112.262	120.971	130.291	147.545	135.943	129.402					7	7.083	7.5	8.218	8.59	10.45	8.3682					7	23545.9	17.3132				3	11.8377	2.27			3	3.92	3.21
		8	171.472	161.454	141.814	151.989	151.749	155.696					8	4.751	5.606	5.069	5.433	7.512	5.6742					8	29890.4	21.9782				4	13.2556	3.33			4	3.9	1.88
		9	173.431	171.958	153.478	180.902	173.431	170.64					9	8.047	6.985	8.7	7.862	8.015	7.9218					9	32005.7	23.5336				5	10.027	2.76			5	4.31	3.79
		10	178.532	159.924	159.359	142.957	191.56	166.466					10	5.433	5.433	7.383	5.27	7.512	6.2062					10	47440.1	34.8824				6	11.7472	1.83			6	4.73	3.13
	4	1	125.513	143.249	141.779	154.533	135.303	140.075	151.591			4	1	7.132	9.4	10.308	12.748	11.851	10.2878	8.39632			4	1	27067.6	19.9026	26.2204			7	10.8891	1.64		10 µg tamoxifen/g egg	1	3.74	2.6
		2	140.428	149.761	147.566	131.067	137.133	141.191					2	4.602	7.083	7.083	6.783	7.75	6.6602					2	41945	30.8419				8	14.6422	3.98			2	3.01	2.93
		3	128.609	125.571	148.371	167.701	162.5	146.55					3	6.25	9.511	9.176	12.652	8.004	9.1186					3	37366.5	27.4754				9	10.2852	2.35			3	3.54	3.26
		4	134.766	157.502	195.509	215.801	249.31	190.578					4	10.865	7.383	5.27	9.223	7.683	8.0848					4	45693.8	33.5984				10	9.75639	2.56			4	3.62	2.85
		5	93.188	103.313	165.632	165.59	131.785	131.902					5	10.146	9.727	9.176	11.932	5.966	9.3894					5	42845.1	31.5038				11	9.79068	2.16		20 ng EE2/g egg	1	5.49	4.01
		6	140.517	173.959	251.953	134.539	175.697	175.333					6	7.66	8.186	7.603	6.68	8.207	7.6672					6	32048.9	23.5654			1 µg tamoxifen/g egg	1	12.1811	3.68			2	3.66	2.98
		7	158.677	161.488	168.774	141.249	119.402	149.918					7	6.36	6.872	6.468	7.277	6.374	6.6702					7	28600.6	21.0299				2	12.6517	1.57			3	4.78	3.35
		8	138.869	149.257	172.079	188.418	242.529	178.23					8	7.66	7.289	7.419	9.878	8.186	8.0864					8	31777.4	23.3657				3	9.15482	2.94			4	6.17	4.44
		9	151.033	126.241	124.122	133.336	136.079	134.162					9	9.501	8.385	8.76	7.454	10.623	8.9446					9	35372.1	26.0089				4	10.6867	2.63		0,1 µg tamoxifen/g egg + 20 ng EE2/g egg	1	5.54	4.22
		10	103.85	112.867	134.28	142.831	146.026	127.971					10	11.373	8.58	8.907	8.75	7.66	9.054					10	33880.3	24.912				5	10.0979	2.19			2	3.54	2.93
	5	1	123.226	148.029	143.952	144.032	132.817	138.411	144.893			5	1	13.084	12.262	14.589	15.023	13.851	13.7618	10.0366			5	1	36547.9	26.8735	25.1304			6	11.0509	1.84			3	4.65	4
		2	140.525	206.808	168.657	163.44	149.167	165.719					2	11.851	10.68	11.258	13.744	11.733	11.8532					2	33137.6	24.3659				7	10.574	2.64			4	5.41	4.72
		3	131.196	137.154	150.946	131.785	162.637	142.744					3	13.851	10.623	9.138	7.683	11.095	10.478					3	35201.2	25.8832				8	12.5502	2.08			5	4.35	3.9
		4	144.244	140.567	178.569	139.727	133.359	147.293					4	8.015	8.207	7.649	8.76	9.52	8.4302					4	34005	25.0037				9	12.5863	2.24			6	4.65	2.94
		5	147.434	150.407	152.046	167.707	151.35	153.789					5	13.807	10	8.79	6.985	9.878	9.892					5	36065.2	26.5185				10	10.7902	1.99		1 µg tamoxifen/g egg + 20 ng EE2/g egg	1	3.91	3.37
		6	98.939	121.478	112.626	102.622	109.671	109.067					6	7.546	7.906	11	7.512	6.985	8.1898					6	33840.6	24.8828				11	11.7207	2.34			2	4.1	3.22
		7	173.151	165.936	119.239	138.145	123.965	144.087					7	10.417	9.252	12.019	7.277	6.36	9.065					7	30344.2	22.3119				12	10.3386	2.14			3	3.87	3.55
		8	134.177	150.301	143.11	187.92	164.169	155.935					8	8.76	9.138	7.96	14.167	11.763	10.3576					8	31210.6	22.949			10 µg tamoxifen/g egg	1	5.04893	1.88		10 µg tamoxifen/g egg + 20 ng EE2/g egg	1	4.86	3.87
		9	177.703	187.813	175.642	158.684	130.035	165.975					9	11.585	11.008	9.317	7.512	8.76	9.6364					9	35153.8	25.8484				2	3.69631	1.91			2	3.86	3.26
		10	137.941	143.11	122.409	112.525	113.581	125.913					10	10.249	9.317	9.148	8.207	6.588	8.7018					10	36266.7	26.6667				3	6.32027	2.13			3	3.52	3.1
	6	1	155.586	163.592	126.889	117.266	132.749	139.216	152.677			6	1	10.647	7.862	10.623	8.76	6.897	8.9578	9.30856			6	1	19936.3	14.659	15.9033			4	9.12046	2.79			4	4.51	3.16
		2	179.963	218.01	167.575	170.008	162.807	179.673					2	14.743	10.607	10.905	10.316	7.75	10.8642					2	21100.2	15.5149				5	5.90668	1.41			5	3.91	2.72
		3	157.379	177.922	132.552	150.999	109.37	145.644					3	11.763	12.255	8.917	11.785	10.035	10.951					3	27472.8	20.2006			20 ng EE2/g egg	1	9.59	1.92			6	3.16	2.88
		4	146.09	135.488	146.553	134.663	149.956	142.55					4	11.219	12.507	14.512	13.926	10.865	12.6058					4	19747.2	14.52				2	9.55	1.66			7	4.64	2.75
		5	193.163	155.28	132.942	182.912	153.136	163.487					5	7.828	5.803	11.851	8.7	7.096	8.2556					5	23034.6	16.9372				3	8.28	2.46			8	3.98	3.5
		6	162.908	140.735	153.41	132.419	128.133	143.521					6	8.186	7.512	5.017	7.454	9.501	7.534					6	21919.5	16.1173				4	-	2.22
		7	151.295	159.169	158.983	177.437	114.018	152.18					7	10.017	10.35	9.501	8.549	12.112	10.1058					7	21815.8	16.041			0,1 µg tamoxifen/g egg + 20 ng EE2/g egg	1	13.96	3.6
		8	179.505	151.22	145.926	152.023	129.928	151.72					8	5.893	7.372	6.509	7.683	7.372	6.9658					8	21733.3	15.9804				2	11.26	2.02
		9	161.873	155.905	163.938	143.391	153.56	155.733					9	9.4	10.291	8.59	9.592	10.017	9.578					9	19959.8	14.6763				3	9.78	1.85
		10	153.993	128.293	171.766	149.703	161.469	153.045					10	9.138	6.194	6.374	7.132	7.5	7.2676					10	19565.5	14.3864			1 µg tamoxifen/g egg + 20 ng EE2/g egg	1	11.36	1.93
	7	1	176.896	181.271	193.909	207.152	174.885	186.823	153.991			7	1	11.335	8.25	5.922	7.096	9.148	8.3502	9.27778			7	1	43156.2	31.7325	30.9826			2	10.41	1.48
		2	138.644	136.239	139.667	114.13	112.052	128.146					2	9.807	9.583	7.784	9.904	9.665	9.3486					2	41218.1	30.3074			10 µg tamoxifen/g egg + 20 ng EE2/g egg	1	4.7	1.29
		3	115.77	119.272	117.026	131.286	111.583	118.987					3	7.512	11.319	7.928	8.302	5.27	8.0662					3	41054.9	30.1874
		4	162.626	160.885	136.728	146.373	131.429	147.608					4	6.731	6.264	5.417	6.374	6.588	6.2748					4	44247.6	32.535
		5	212.453	184.257	178.718	180.512	193.082	189.804					5	10.417	8.946	9.501	10.086	10.753	9.9406					5	46945.3	34.5186
		6	147.434	136.015	132.34	129.663	121.758	133.442					6	8.76	8.437	10.623	9.446	7.828	9.0188					6	42078.4	30.94
		7	180.008	185.152	167.199	171.272	156.846	172.095					7	8.946	7.289	10.905	8.437	6.522	8.4198					7	42953.9	31.5837
		8	139.767	133.234	116.076	123.04	96.177	121.659					8	9.363	9.138	11.008	10.069	8.59	9.6336					8	45525.1	33.4743
		9	161.54	158.388	155.914	148.887	162.023	157.35					9	12.304	14.006	11.494	14.006	16.651	13.6922					9	40035.5	29.4379
		10	155.264	189.475	176.139	201.801	197.294	183.995					10	9.317	8.7	11.441	9.1	11.607	10.033					10	34148.4	25.1091
	8	1	132.594	107.27	158.902	155.11	127.456	136.266	146.412			8	1	11.8	7.419	7.372	8.271	11.844	9.3412	8.58984			8	1	34105.4	25.0775	27.483
		2	184.846	193.852	187.085	167.16	124.911	171.571					2	14.222	7.649	8.437	9.252	6.935	9.299					2	34077.3	25.0568
		3	118.626	100.031	100.347	127.87	140.784	117.532					3	8.7	9.501	8.385	8.839	10.516	9.1882					3	38450	28.2721
		4	114.167	116.714	110.805	148.943	115.293	121.184					4	8.67	8.437	5.893	6.25	6.522	7.1544					4	37462.2	27.5457
		5	125.277	119.272	114.761	136.14	128.803	124.851					5	8.839	9.167	8.67	9.252	10.138	9.2132					5	37477.8	27.5572
		6	120.845	135.003	176.737	153.342	175.05	152.195					6	8.839	7.96	7.277	5.966	6.264	7.2612					6	36055.3	26.5113
		7	80.988	86.16	139.563	153.225	188.009	129.589					7	8.498	8.207	8.59	7.66	7.372	8.0654					7	45216.2	33.2472
		8	188.35	165.008	152.946	169.298	156.702	166.461					8	8.917	12.255	9.446	6.783	8.218	9.1238					8	29567.8	21.741
		9	142.753	186.936	156.915	196.868	143.916	165.478					9	7.12	6.935	8.004	7.096	11.219	8.0748					9	35788.7	26.3152
		10	187.285	179.058	162.346	191.712	174.551	178.99					10	11.211	9.176	9.252	9.176	7.071	9.1772					10	45568.3	33.5061
	9	1	171.774	171.442	198.706	84.266	148.382	154.914	138.676		solvent control	1	1	11.585	12.754	11.524	8.59	11.464	11.1834	10.4304			9	1	34828.8	25.6094	26.993
		2	130.844	139.107	151.119	162.515	119.388	140.595					2	11.844	12.019	12.7	13.553	10.35	12.0932					2	31353.4	23.054
		3	133.193	134.177	150.197	163.133	164.724	149.085					3	11.464	11.741	11.441	11.095	11.211	11.3904					3	37720.7	27.7358
		4	185.317	127.677	133.065	143.923	152.9	148.576					4	11.917	11.219	8.946	10.291	10.172	10.509					4	32871.9	24.1705
		5	206.293	168.83	122.443	152.108	166.335	163.202					5	10.607	12.672	12.754	9.363	8.015	10.6822					5	39773.8	29.2454
		6	180.989	135.28	153.659	120.396	122.91	142.647					6	10.086	7.372	7.277	8.76	6.346	7.9682					6	37440.3	27.5296
		7	136.486	128.941	123.359	121.738	119.658	126.036					7	10.937	10.833	7.277	10.249	9.52	9.7632					7	49747	36.5787
		8	116.741	103.041	106.797	110.369	160.555	119.501					8	8.047	6.731	9.223	9.428	8.25	8.3358					8	39389.2	28.9626
		9	109.57	129.885	165.204	104.193	190.029	139.776					9	11.524	13.756	11.196	11.524	11.524	11.9048					9	30559.5	22.4702
		10	95.179	102.7	116.964	107.371	89.927	102.428					10	9.878	8.946	9.223	10.905	13.418	10.474					10	33419.6	24.5732
	10	1	139.289	137.48	153.971	139.309	136.953	141.4	148.333			2	1	9.727	8.437	9.014	13.294	15.467	11.1878	9.9453		untreated control	1	1	39141.4	28.7804	28.8189
		2	145.497	146.603	175.792	177.781	164.876	162.11					2	13.418	9.501	9.446	9.428	10.442	10.447					2	34079	25.0581
		3	168.797	145.038	108.49	120.214	153.451	139.198					3	8.09	7.419	7.419	8.549	8.549	8.0052					3	36186.1	26.6074
		4	130.908	115.428	152.666	121.912	130.013	130.185					4	6.783	10.078	10.905	12.507	13.775	10.8096					4	40527.9	29.7999
		5	141.286	155.11	196.2	195.349	135.657	164.72					5	6.935	8.218	8.015	9.363	7.649	8.036					5	46482.3	34.1782
		6	136.13	181.846	188.099	156.808	157.938	164.164					6	9.446	12.754	7.071	11.441	8.437	9.8298					6	37290.2	27.4193
		7	130.836	160.49	197.261	130.833	153.336	154.551					7	8.015	8.75	9.727	11.997	9.754	9.6486					7	36102.9	26.5463
		8	112.478	112.562	161.815	156.888	149.919	138.732					8	13.044	12.72	10.516	11.258	12.923	12.0922					8	46403.7	34.1204
		9	121.661	138.934	158.782	185.437	152.646	151.492					9	8.907	8.302	8.858	10.086	9.763	9.1832					9	34102	25.075
		10	159.274	151.667	119.239	119.586	134.128	136.779					10	9.4	11.733	10.961	9.807	9.167	10.2136					10	41620.9	30.6036
	11	1	164.924	159.219	125.114	152.154	130.437	146.37	156.456			3	1	10.865	7.289	9.363	9.014	8.015	8.9092	9.54938			2	1	32554.3	23.937	27.5663
		2	148.333	140.159	156.919	143.132	167.452	151.199					2	8.75	6.731	7.862	8.67	10.516	8.5058					2	33347.6	24.5203
		3	166.187	160.332	169.642	126.546	93.708	143.283					3	10.45	10.078	9.176	8.59	8.218	9.3024					3	46148.5	33.9327
		4	182.365	176.967	162.331	137.437	139.921	159.804					4	12.311	10.442	8.79	10.937	12.083	10.9126					4	43199.6	31.7644
		5	173.015	136.272	128.604	168.737	146.534	150.632					5	9.223	9.619	10.146	7.603	10.817	9.4816					5	35299.7	25.9557
		6	179.94	186.138	175.287	157.694	130.504	165.913					6	9.52	7.512	11.008	9.363	8.917	9.264					6	32626.9	23.9904
		7	126.497	149.176	197.296	161.873	133.721	153.713					7	7.828	11.932	11.585	12.148	10.172	10.733					7	37547.9	27.6088
		8	170.302	156.846	140.722	189.447	168.83	165.229					8	9.727	9.727	11.524	14.191	11.211	11.276					8	38243.3	28.1201
		9	172.409	160.265	152.843	197.836	143.144	165.299					9	9.904	9.754	9.807	9.592	12.507	10.3128					9	38023	27.9581
		10	179.37	169.372	185.002	157.678	124.167	163.118					10	7.096	7.512	7.132	7.383	4.859	6.7964					10	37911	27.8757
	12	1	133.575	167.964	179.963	199.795	182.517	172.763	146.805			4	1	10.442	10.442	6.588	9.807	9.718	9.3994	9.4814			3	1	37085.6	27.2688	25.2426
		2	137.891	175.408	189.062	189.062	202.184	178.721					2	9.501	8.302	7.828	11.441	10.069	9.4282					2	38133.5	28.0393
		3	134.001	142.607	141.276	142.014	146.306	141.241					3	10.249	10.417	8.333	9.583	9.138	9.544					3	29491	21.6846
		4	173.241	163.607	148.497	142.11	120.491	149.589					4	7.512	6.194	9.763	8.858	10.607	8.5868					4	30097.5	22.1305
		5	216.277	117.453	113.263	148.008	197.95	158.59					5	10.249	9.592	9.763	12.43	11.219	10.6506					5	33062.1	24.3104
		6	134.433	160.877	159.138	160.877	135.044	150.074					6	8.79	5	7.512	10.078	7.96	7.868					6	55046.3	40.4752
		7	165.68	145.547	168.385	86.991	133.242	139.969					7	9.727	12.169	10.623	10.417	10.017	10.5906					7	37565	27.6213
		8	90.143	127.072	122.545	134.686	116.515	118.192					8	8.59	8.427	9.363	8.76	9.904	9.0088					8	25847.8	19.0057
		9	151.996	143.952	137.26	121.795	136.799	138.36					9	8.7	5.966	7.546	6.783	10.009	7.8008					9	26430	19.4338
		10	126.59	131.577	107.835	116.863	119.91	120.555					10	13.851	12.652	11.555	8.79	12.836	11.9368					10	30540.7	22.4564
	13	1	156.269	140.485	130.908	123.04	133.523	136.845	138.827			5	1	10.017	9.619	9.252	10.961	10.291	10.028	9.92958			4	1	39566.8	29.0932	27.7077
		2	138.757	155.586	158.257	132.804	139.468	144.974					2	12.112	7.828	11.932	10.623	8.207	10.1404					2	34368.8	25.2712
		3	132.565	131.69	142.246	132.385	139.406	135.658					3	8.09	7.512	9.176	8.975	11.555	9.0616					3	33550.6	24.6696
		4	162.177	154.031	149.448	134.332	130.024	146.002					4	10.442	9.718	11.335	11.008	12.5	11.0006					4	40831	30.0228
		5	152.108	154.353	153.048	143.314	151.063	150.777					5	11	10.68	8.015	9.317	11.032	10.0088					5	36564.4	26.8856
		6	140.258	141.367	147.158	134.174	136.57	139.905					6	11	11.095	11.211	10.017	8.437	10.352					6	37852.7	27.8329
		7	149.594	151.385	154.473	138.245	144.407	147.621					7	13.34	10.672	11.335	10.291	12.507	11.629					7	40458.7	29.749
		8	135.575	148.56	147.378	148.104	123.923	140.708					8	9.204	8.302	10.172	9.727	8.975	9.276					8	36808.2	27.0649
		9	135.874	140.428	133.169	115.86	117.857	128.638					9	7.66	9.1	10.549	10.017	6.783	8.8218					9	39399.3	28.9701
		10	122.489	102.5	115.737	116.622	128.35	117.14					10	9.904	10.078	9.176	8.218	7.512	8.9776					10	37423.6	27.5174
	14	1	139.714	132.041	114.943	142.644	125.477	130.964	141.905			6	1	8.76	8.218	9.363	7.862	7.862	8.413	9.821			5	1	53860.7	39.6035	37.8315
		2	136.677	162.741	141.6	145.117	132.804	143.788					2	8.375	7.906	9.501	8.344	7.96	8.4172					2	43491.3	31.9789
		3	118.887	137.903	121.349	127.563	116.488	124.438					3	6.509	7.512	8.271	6.834	8.79	7.5832					3	41668.8	30.6388
		4	152.818	134.768	141.466	120.422	121.249	134.145					4	10.035	9.363	8.427	8.09	7.683	8.7196					4	42819.5	31.4849
		5	155.581	175.851	129.11	178.516	146.915	157.195					5	10.647	10.069	14.099	8.59	9.446	10.5702					5	47089.4	34.6246
		6	122.412	118.898	135.994	110.469	111.296	119.814					6	11.219	10.937	7.96	8.858	9.138	9.6224					6	36373	26.7449
		7	124.972	146.107	141.276	132.749	122.011	133.423					7	12.083	12.964	11.494	10.623	5.789	10.5906					7	83467.5	61.3732
		8	170.294	130.267	166.508	181.667	135.503	156.848					8	8.333	12.112	9.834	10.753	9.501	10.1066					8	45121.8	33.1778
		9	147.201	123.435	180.562	180.251	129.005	152.091					9	12.148	9.939	9.939	8.549	13.288	10.7726					9	51270	37.6985
		10	152.427	152.318	186.934	169.659	170.369	166.341					10	13.235	11.932	13.077	16.525	12.304	13.4146					10	69346.3	50.9899
	15	1	156.853	156.746	163.31	122.35	162.98	152.448	155.404			7	1	8.59	9.363	9.718	8.437	11.763	9.5742	11.0561			6	1	33595.9	24.7029	29.4213
		2	151.063	169.076	171.442	139.953	160.833	158.473					2	10.516	11.095	14.583	15.662	14.349	13.241					2	36931.8	27.1557
		3	164.808	152.007	136.364	161.83	143.035	151.609					3	17.007	18.503	13.176	12.507	16.677	15.574					3	42681.9	31.3837
		4	153	148.703	156.065	165.708	191.01	162.897					4	10.905	9.252	11.095	12.374	14.142	11.5536					4	41127.1	30.2405
		5	158.695	181.514	173.945	160.771	136.852	162.355					5	10.516	9.223	9.511	10.905	15	11.031					5	33744.3	24.812
		6	153.157	177.553	197.713	155.467	151.596	167.097					6	12.782	11.607	10.146	10.937	10.833	11.261					6	47078.6	34.6166
		7	129.11	147.087	171.83	151.669	136.015	147.142					7	8.829	10.291	10.647	10.491	11.319	10.3154					7	41057.1	30.189
		8	174.837	171.028	140.567	139.535	114.701	148.134					8	8.946	10.417	9.754	12.486	9.592	10.239					8	44283.2	32.5612
		9	145.855	146.064	142.795	148.85	168.953	150.503					9	10.069	8.7	7.096	8.76	8.839	8.6928					9	39876	29.3206
		10	121.487	135.301	161.023	167.763	181.307	153.376					10	9.176	9.501	8.917	9.754	8.047	9.079					10	39754.1	29.231
solvent control	1	1	183.585	170.249	171.077	164.952	207.431	179.459	166.739			8	1	10.516	8.975	8.829	11.844	10.069	10.0466	8.8558			7	1	36557.9	26.8808	31.9713
		2	190.841	175.644	169.2	164.201	162.861	172.549					2	9.176	8.76	8.218	8.207	9.718	8.8158					2	36691.6	26.9791
		3	160.282	196.435	166.81	158.493	159.976	168.399					3	5.893	5.667	7.75	6.588	6.897	6.559					3	38085.3	28.0039
		4	148.775	154.365	168.5	147.841	130.197	149.936					4	7.66	6.36	7.289	9.501	6.482	7.4584					4	52259.4	38.426
		5	154.625	167.34	198.293	191.793	190.442	180.499					5	8.004	6.834	8.385	8.67	8.858	8.1502					5	46334	34.0691
		6	179.234	187.157	193.802	175.329	184.731	184.051					6	8.25	8.917	9.501	7.169	11.211	9.0096					6	45141.3	33.1921
		7	200.752	187.966	186.832	192.014	195.292	192.571					7	6.25	8.59	11.674	10.516	10.809	9.5678					7	47518.3	34.9399
		8	154.079	179.262	190.544	183.168	180.902	177.591					8	9.511	8.385	11.219	9.718	8.67	9.5006					8	42754.3	31.437
		9	93.845	95.033	104.835	106.344	111.212	102.254					9	8.58	9.665	8.907	9.619	7.083	8.7708					9	45228.4	33.2562
		10	160.641	148.326	155.271	164.81	171.371	160.084					10	10.541	10.146	11.38	8.829	12.5	10.6792					10	44238.5	32.5283
	2	1	171.401	191.213	149.539	148.616	148.101	161.774	162.09			9	1	11.741	9.511	11.335	11.008	6.731	10.0652	8.94154			8	1	36793	27.0537	30.1712
		2	150.208	166.95	173.726	152.352	165.909	161.829					2	7.66	7.12	7.12	7.603	8.015	7.5036					2	40033.7	29.4365
		3	129.234	133.879	106.187	129.059	126.711	125.014					3	18.601	17.52	14.167	13.017	13.044	15.2698					3	36027.4	26.4907
		4	115.932	134.164	134.177	119.49	145.002	129.753					4	10.249	8.047	11.18	7.512	8.7	9.1376					4	42605.3	31.3274
		5	316.115	239.138	202.93	206.734	226.771	238.338					5	5	10.146	7.512	7.546	7.277	7.4962					5	38276.5	28.1445
		6	151.779	148.448	138.336	162.758	140.873	148.439					6	8.047	7.277	6.468	8.79	7.683	7.653					6	39751.5	29.229
		7	226.351	240.019	171.061	224.934	207.587	213.99					7	4.167	6.25	6.731	7.5	7.906	6.5108					7	39891.1	29.3317
		8	145.038	137.51	135.844	160.868	137.624	143.377					8	5.27	7.603	6.719	5.433	7.096	6.4242					8	49354.5	36.2901
		9	141.6	143.122	146.069	140.389	151.116	144.459					9	9.138	5.221	10.417	9.4	7.828	8.4008					9	49645.2	36.5038
		10	165.917	167.218	158.765	131.69	146.026	153.923					10	11.622	11.319	10.491	11.674	9.665	10.9542					10	37949.8	27.9043
	3	1	148.347	149.008	165.967	157.555	162.524	156.68	143.99			10	1	7.372	7.372	8.004	8.015	7.96	7.7446	10.6736			9	1	43538.8	32.0138	30.5816
		2	144.458	162.98	141.912	161.926	156.846	153.624					2	7.862	8.67	7.419	9.834	7.419	8.2408					2	39018.4	28.69
		3	157.008	158.966	150.002	169.175	154.392	157.909					3	10.086	8.271	7.862	7.096	8.09	8.281					3	30510.8	22.4344
		4	140.022	169.175	159.186	150.836	143.336	152.511					4	15.098	14.006	14.554	13.807	15.144	14.5218					4	41995.9	30.8793
		5	159.796	153.011	145.022	147.839	152.536	151.641					5	11.219	11.071	13.084	10.865	14.167	12.0812					5	41019.9	30.1617
		6	119.341	115.112	119.03	118.618	120.038	118.428					6	13.077	11.859	11.674	15.167	12.754	12.9062					6	42553.6	31.2894
		7	155.853	137.591	166.76	137.662	155.009	150.575					7	14.222	10.647	9.592	11.939	12.672	11.8144					7	42874	31.525
		8	103.619	96.354	103.202	111.408	96.667	102.25					8	8.75	8.344	10.809	12.148	10.549	10.12					8	46970.5	34.5371
		9	152.053	152.646	153.39	150.113	138.336	149.308					9	10.308	9.691	7.383	6.783	11.441	9.1212					9	44329.3	32.5951
		10	134.332	141.676	147.502	153.716	157.641	146.973					10	10.647	11.219	12.693	10.865	14.099	11.9046					10	43098.9	31.6904
	4	1	178.117	182.09	148.071	161.669	153.306	164.651	152.637		0,1 µg tamoxifen/g egg	1	1	7.828	6.731	7.277	5.803	6.522	6.8322	8.75082		0,1 µg tamoxifen/g egg	1	1	42680.9	31.383	30.0041
		2	156.014	166.987	122.284	136.903	133.242	143.086					2	7.683	6.834	9.014	8.437	8.302	8.054					2	42484.1	31.2383
		3	170.304	168.791	174.215	164.175	142.85	164.067					3	14.252	10.516	7.083	8.58	6.731	9.4324					3	31594.8	23.2315
		4	159.359	150.861	163.851	167.041	143.807	156.984					4	9.763	10.865	11.844	11.494	10.607	10.9146					4	42009.5	30.8893
		5	219.168	189.315	175.865	116.195	144.227	168.954					5	4.658	6.346	4.167	5.417	7.277	5.573					5	36849	27.0949
		6	138.717	149.411	113.385	122.939	141.483	133.187					6	9.363	8.917	10.753	8.302	7.66	8.999					6	41611.5	30.5967
		7	159.271	159.239	128.695	158.894	169.775	155.175					7	8.333	6.25	6.719	5.667	5.803	6.5544					7	40730	29.9485
		8	155.065	134.508	142.022	177.169	135.836	148.92					8	10.491	11.674	11.281	9.665	12.148	11.0518					8	44172.3	32.4796
		9	153.851	177.768	163.802	141.838	141.249	155.702					9	10.017	6.935	7.096	8.839	7.096	7.9966					9	36060.1	26.5148
		10	106.93	117.24	137.057	148.158	168.846	135.646					10	12.112	11.281	11.25	11.667	14.191	12.1002					10	49863.5	36.6643
	5	1	152.666	158.248	151.412	160.782	147.632	154.148	149.622			2	1	7.383	7.277	6.36	5.667	8.207	6.9788	7.3926			2	1	41610.8	30.5962	25.2426
		2	127.372	150.455	156.269	141.814	150.079	145.198					2	6.667	5.803	7.12	7.917	8.76	7.2534					2	26455.7	19.4527
		3	150.891	154.637	132.877	148.523	131.701	143.726					3	6.374	5	6.68	4.249	7.083	5.8772					3	42870.1	31.5221
		4	122.616	163.182	157.907	149.083	152.192	148.996					4	7.917	6.067	7.784	7.66	5.667	7.019					4	39426.9	28.9904
		5	165.282	157.676	141.328	147.227	138.506	150.004					5	7.454	8.218	6.522	7.383	8.427	7.6008					5	25634.9	18.8492
		6	149.771	141.001	133.679	151.669	134.34	142.092					6	8.015	5.848	6.872	5.559	6.264	6.5116					6	34093.7	25.0689
		7	158.8	148.326	159.274	164.021	158.528	157.79					7	8.975	6.985	9.317	9.727	7.928	8.5864					7	35816	26.3353
		8	120.26	137.338	143.529	185.97	180.989	153.617					8	8.218	6.067	7.454	7.66	6.588	7.1974					8	23330.7	17.1549
		9	127.241	123.839	156.625	165.282	155.976	145.793					9	8.344	7.784	7.383	7.66	9.501	8.1344					9	29956.5	22.0268
		10	126.34	151.385	158.388	173.455	164.724	154.858					10	7.454	8.59	9.691	9.52	8.58	8.767					10	44104.3	32.4296
	6	1	170.815	182.468	178.569	180.251	166.103	175.641	170.025			3	1	9.904	7.96	10.035	7.096	7.5	8.499	9.56348			3	1	26499.8	19.4851	25.8422
		2	148.01	154.762	147.502	174.503	158.151	156.586					2	7.546	7.546	7.096	7.096	10.009	7.8586					2	36099.1	26.5435
		3	145.748	150.28	137.664	190.513	169.937	158.828					3	10.417	7.083	7.096	7.512	9.691	8.3598					3	41562	30.5603
		4	169.824	148.258	138.529	137.057	169.519	152.637					4	12.339	12.148	11.373	10.417	11.281	11.5116					4	35096.4	25.8062
		5	143.674	155.501	165.336	146.52	168.673	155.941					5	6.719	7.512	8.995	10.017	8.498	8.3482					5	26239.7	19.2939
		6	166.043	151.822	172.208	154.416	158.202	160.538					6	7.083	6.009	4.751	5.303	8.333	6.2958					6	28757.3	21.1451
		7	198.999	173.672	160.943	189.598	229.082	190.459					7	11.733	11.696	12.339	10.841	13.333	11.9884					7	37852.2	27.8325
		8	199.612	151.247	195.509	216.604	198.377	192.27					8	11.032	11.733	10.623	13.45	12.134	11.7944					8	37525.1	27.592
		9	173.401	147.182	169.216	200.434	196.91	177.429					9	10.249	10.45	9.148	10.623	10.833	10.2606					9	41683.2	30.6494
		10	208.041	186.162	169.068	166.594	169.722	179.917					10	8.946	12.255	11.219	10.623	10.549	10.7184					10	40138.7	29.5137
	7	1	159.175	129.169	123.435	110.079	122.729	128.917	147.966			4	1	7.96	8.76	5.667	3.931	5.893	6.4422	7.91268			4	1	52155.7	38.3498	33.721
		2	162.918	156.281	162.792	191.26	175.895	169.829					2	9.223	9.665	8.76	6.985	8.047	8.536					2	41609.3	30.5951
		3	131.88	141.387	135.003	145.022	135.064	137.671					3	10.841	5.559	8.218	7.096	8.7	8.0828					3	45943.3	33.7818
		4	133.255	144.535	140.989	171.491	145.086	147.071					4	10.817	9.317	10.549	11.674	6.872	9.8458					4	34452	25.3324
		5	152.971	160.529	151.834	168.846	161.525	159.141					5	6.36	4.35	7.383	7.096	9.592	6.9562					5	43883.3	32.2671
		6	125.025	137.503	154.223	163.367	113.703	138.764					6	9.583	7.96	6.374	6.588	8.218	7.7446					6	47100.2	34.6325
		7	138.336	142.539	131.835	125.858	141.706	136.055					7	7.784	8.015	6.719	8.186	8.75	7.8908					7	52863.6	38.8703
		8	130.024	164.471	169.169	142.539	155.009	152.242					8	6.305	8.344	6.194	4.507	5.086	6.0872					8	48169.1	35.4185
		9	175.044	186.579	126.801	174.503	156.813	163.948					9	6.194	7.512	6.985	7.828	8.271	7.358					9	-	-
		10	133.336	146.667	145.038	153.37	151.703	146.023					10	13.623	9.727	11.733	10	5.833	10.1832					10	46569	34.2419
	8	1	164.775	132.678	136.027	142.346	157.756	146.716	154.121		1 µg tamoxifen/g egg	1	1	11.464	8.995	7.512	10.623	14.778	10.6744	8.89616		1 µg tamoxifen/g egg	1	1	32229	23.6978	25.4492
		2	143.181	150.739	106.628	171.594	168.5	148.128					2	8.7	5.966	5.069	6.264	7.96	6.7918					2	38959	28.6463
		3	168.564	142.158	112.549	111.558	127.935	132.553					3	8.79	7.683	10.146	11.071	8.907	9.3194					3	33356.5	24.5268
		4	193.882	218.316	215.655	216.123	208.903	210.576					4	8.76	10.069	12.112	6.731	8.218	9.178					4	33767.7	24.8292
		5	121.495	137.52	152.448	146.48	139.027	139.394					5	6.897	7.928	7.683	8.207	8.79	7.901					5	39333.1	28.9214
		6	141.995	171.472	118.582	162.98	170.606	153.127					6	10.249	9.317	8.333	8.015	9.1	9.0028					6	33284.3	24.4738
		7	102.774	151.79	126.601	142.08	155.081	135.665					7	12.091	8.375	7.5	7.132	8.59	8.7376					7	37755.4	27.7613
		8	156.702	163.692	177.414	177.375	166.504	168.337					8	7.383	6.783	8.7	12.977	15.023	10.1732					8	36009.2	26.4774
		9	174.567	163.684	176.826	146.705	167.614	165.879					9	9.665	8.907	8.59	7.66	8.207	8.6058					9	31579	23.2199
		10	133.879	138.356	155.532	129.424	146.972	140.833					10	9.807	6.719	6.522	11.25	8.59	8.5776					10	29835.4	21.9378
0,1 µg tamoxifen/g egg	1	1	122.247	129.156	133.344	154.437	142.058	136.248	98.2152			2	1	9.204	6.667	6.68	6.374	7.512	7.2874	8.04632			2	1	34612.6	25.4504	24.4455
		2	90	94.299	93.708	94.299	37.435	81.9482					2	9.317	10.249	8.207	8.59	6.25	8.5226					2	30502.9	22.4286
		3	120.945	110.155	89.334	111.567	104.765	107.353					3	9.252	8.427	7.928	10.146	9.718	9.0942					3	35092.3	25.8032
		4	72.734	78.921	79.451	109.119	122.939	92.6328					4	8.09	9.176	5.893	5.559	9.204	7.5844					4	31629.9	23.2573
		5	101.984	104.3	92.766	90.223	76.653	93.1852					5	6.264	7.917	6.305	5.559	7.383	6.6856					5	34616.6	25.4534
		6	116.649	122.276	120.257	108.653	80.321	109.631					6	8.302	7.512	8.333	10.417	7.683	8.4494					6	30222.4	22.2224
		7	86.172	84.146	102.069	97.272	121.395	98.2108					7	5.559	7.277	6.468	7.96	5.848	6.6224					7	23958.7	17.6167
		8	70.317	79.276	91.72	71.346	100.692	82.6702					8	5.803	7.96	6.264	10.817	10.442	8.2572					8	35717.7	26.263
		9	109.956	118.004	124.368	113.728	79.552	109.122					9	7.132	6.872	7.784	9.904	9.511	8.2406					9	40102.4	29.4871
		10	74.991	74.073	72.801	65.085	68.804	71.1508					10	11.118	9.204	11.258	8.427	8.59	9.7194					10	36002.8	26.4726
	2	1	153.03	158.931	182.233	175.936	154.212	164.868	112.444			3	1	11.8	8.67	10.078	12.148	8.302	10.1996	8.89477			3	1	38190.5	28.0813	23.0656
		2	151.22	126.167	125.069	99.254	102.5	120.842					2	9.691	13.242	10.417	12.112	12.672	11.6268					2	39501.3	29.0451
		3	153.652	158.563	146.147	139.603	122.998	144.193					3	6.588	9.501	8.302	9.592	7.372	8.271					3	36225.7	26.6365
		4	155.709	140.062	127.26	146.299	139.866	141.839					4	8.333	9.176	6.872	6.588	6.68	7.5298					4	22702.2	16.6928
		5	115.386	126.337	96.177	102.798	151.082	118.356					5	9.363	6.719	8.09	6.194	8.59	7.7912					5	36323.5	26.7085
		6	114.68	110.946	121.678	89.334	105.915	108.511					6	8.79	9.878	7.828	5.966	7.289	7.9502					6	33367.8	24.5351
		7	75	80.004	80.212	70.877	74.209	76.0604					7	-	-	-	-	-	-					7	39429.3	28.9921
		8	81.181	87.341	76.126	94.06	77.947	83.331					8	-	-	-	-	-	-					8	25734.7	18.9226
		9	92.169	82.886	93.009	76.399	76.035	84.0996					9	-	-	-	-	-	-					9	18953.5	13.9364
		10	56.887	64.603	110.369	84.611	95.234	82.3408					10	-	-	-	-	-	-					10	23263.2	17.1053
	3	1	136.056	137.682	159.724	119.272	133.838	137.314	115.365			4	1	7.862	7.419	6.834	5.303	5.303	6.5442	7.47812			4	1	32141.9	23.6337	25.4754
		2	153.806	126.123	104.313	94.872	110.937	118.01					2	8.186	7.132	6.264	6.264	6.264	6.822					2	36178.2	26.6016
		3	107.529	109.319	134.177	136.402	160.667	129.619					3	6.522	5.303	5.336	4.429	6.152	5.5484					3	28678.3	21.087
		4	107.293	99.624	125.527	129.797	143.59	121.166					4	5.336	8.271	7.071	5.606	7.96	6.8488					4	31356.4	23.0562
		5	86.526	84.381	80.506	87.896	74.424	82.7466					5	10.753	11.211	10.316	8.59	10.753	10.3246					5	32396.6	23.821
		6	92.485	93.467	80.433	81.53	92.83	88.149					6	5.606	8.015	7.828	10.647	9.501	8.3194					6	29842.2	21.9428
		7	107.27	105.541	112.478	126.497	115.232	113.404					7	8.67	5.433	5.017	5.667	6.25	6.2074					7	27415.3	20.1583
		8	117.524	115.617	71.322	118.16	81.364	100.797					8	8.385	10.291	8.59	7.071	9.511	8.7696					8	63138.2	46.4251
		9	71.928	62.344	80.902	191.683	141.249	109.621					9	6.009	5.667	7.169	8.385	7.277	6.9014					9	33125.6	24.3571
		10	174.073	160.939	156.296	142.658	130.155	152.824					10	9.446	8.271	7.96	7.372	9.428	8.4954					10	32192.2	23.6707
	4	1	65.881	69.462	60.788	65.027	64.188	65.0692	85.8027			5	1	7.683	5.966	7.862	4.507	6.783	6.5602	7.03812			5	1	38609.6	28.3894	26.9042
		2	71.672	108.337	95.837	93.233	78.784	89.5726					2	5.893	7.603	5.833	6.25	6.68	6.4518					2	40261.8	29.6043
		3	99.223	105.833	91.701	96.444	121.109	102.862					3	9.511	8.58	6.522	6.731	5.667	7.4022					3	37554.1	27.6133
		4	92.71	92.229	71.899	77.303	46.734	76.175					4	7.289	7.383	8.79	6.897	6.731	7.418					4	36027	26.4904
		5	76.739	60.168	51.593	44.799	60.104	58.6806					5	6.667	5.966	6.25	6.25	6.009	6.2284					5	31460.8	23.1329
		6	79.835	82.264	109.829	74.703	61.334	81.593					6	8.829	5.017	6.374	6.25	7.096	6.7132					6	32358.3	23.7929
		7	99.443	95.779	78.031	81.62	84.381	87.8508					7	9.138	7.383	6.374	7.193	5.848	7.1872					7	37465.8	27.5484
		8	94.004	104.695	109.5	70.956	93.467	94.5244					8	8.59	8.59	9.807	9.665	9.665	9.2634					8	41061.1	30.192
		9	96.267	95.703	107.736	102.069	77.643	95.8836					9	7.5	5.559	5.966	5.48	5.069	5.9148					9	36418.5	26.7783
		10	109.557	116.91	106.784	110.846	84.984	105.816					10	6.067	7.546	8.302	6.783	7.512	7.242					10	34680.5	25.5004
	5	1	146.439	144.265	103.99	148.448	108.72	130.372	124.676			6	1	6.588	8.498	6.68	6.25	7.512	7.1056	7.312		10 µg tamoxifen/g egg	1	1	35842.6	26.3549	26.9925
		2	113.002	122.273	137.762	191.059	114.467	135.713					2	6.067	5.59	5.017	6.783	6.264	5.9442					2	33967.9	24.9764
		3	113.593	106.125	111.081	115.205	81.245	105.45					3	6.374	5.667	8.75	8.09	7.12	7.2002					3	25535.4	18.776
		4	109.874	127.503	104.539	92.515	127.402	112.367					4	6.009	6.305	8.498	6.935	9.014	7.3522					4	35716.9	26.2624
		5	108.044	124.928	150.301	149.446	136.514	133.847					5	10.417	8.59	7.906	10.905	8.59	9.2816					5	43112.2	31.7001
		6	81.858	105.162	98.46	98.928	78.373	92.5562					6	9.583	8.427	9.52	6.305	4.167	7.6004					6	40721.7	29.9424
		7	171.806	124.044	149.164	146.865	195.989	157.574					7	10.841	8.907	9.223	8.498	7.5	8.9938					7	43043.3	31.6495
		8	150.28	102.767	106.396	126.601	124.108	122.03					8	5.922	6.194	6.935	4.658	4.602	5.6622					8	35780.4	26.3091
		9	139.886	121.738	123.336	156.846	135.208	135.403					9	10.541	7.5	5.433	6.872	7.5	7.5692					9	31720.4	23.3238
		10	110.309	112.944	116.67	132.293	135.041	121.451					10	5.966	6.264	6.68	6.783	6.36	6.4106					10	41657.7	30.6307
	6	1	110.946	86.671	91.215	105.33	98.333	98.499	97.3861		10 µg tamoxifen/g egg	1	1	9.1	8.186	8.302	7.784	6.985	8.0714	8.2134			2	1	39230.8	28.8462	26.3818
		2	92.665	108.199	116.622	115.812	96.04	105.868					2	7.683	9.619	11.219	11.859	12.388	10.5536					2	42524.5	31.268
		3	115.244	117.026	136.758	99.198	75.852	108.816					3	7.12	7.66	7.132	7.546	6.667	7.225					3	36602.3	26.9135
		4	75.852	82.538	102.717	150.591	156.181	113.576					4	5.48	7.277	7.383	6.783	6.719	6.7284					4	33779.6	24.8379
		5	42.898	38.342	61.7	53.496	52.188	49.7248					5	8.015	9.665	7.96	7.917	9.167	8.5448					5	38291.6	28.1556
		6	140.159	123.404	151.116	124.169	95.354	126.84					6	8.015	7.083	7.083	6.264	7.083	7.1056					6	39389.1	28.9626
		7	120.649	125.709	132.112	120.416	113.192	122.416					7	8.946	9.148	9.904	8.79	7.454	8.8484					7	32740.1	24.0736
		8	147.604	143.178	113.85	98.647	120.214	124.699					8	10.078	11.373	9.501	8.995	9.252	9.8398					8	36453.5	26.804
		9	40.32	54.785	51.167	57.566	81.181	57.0038					9	7.96	12.964	10.672	9.252	10.291	10.2278					9	28007.5	20.5938
		10	64.399	42.246	70.168	82.234	73.053	66.42					10	4.658	3.773	3.75	5.893	6.872	4.9892					10	31772.8	23.3624
	7	1	292.505	324.025	318.645	324.133	311.064	314.074	148.062			2	1	7.083	6.985	6.872	7.383	8.829	7.4304	9.83056			3	1	41587.5	30.579	30.1326
		2	190.018	190.933	123.797	150.794	163.148	163.738					2	8.7	9.807	8.59	8.7	8.437	8.8468					2	48925.2	35.9744
		3	128.79	178.045	198.244	139.014	129.628	154.744					3	9.317	10.417	10.841	9.167	10.009	9.9502					3	40681.9	29.9132
		4	61.745	83.02	70.603	99.878	110.164	85.082					4	8.09	11.032	8.839	9.592	8.995	9.3096					4	39665.9	29.1661
		5	132.942	126.109	90.833	104.197	137.994	118.415					5	12.112	10.905	9.252	8.79	11.696	10.551					5	40086.9	29.4757
		6	0	0	149.782	183.64	153.634	97.4112					6	11.577	13.604	9.52	13.969	10.712	11.8764					6	38874.2	28.584
		7	155.628	179.886	102.902	139.057	139.144	143.323					7	8.437	8.09	8.375	5.893	6.374	7.4338					7	44009.3	32.3598
		8	182.977	163.072	150.046	170.1	150.843	163.408					8	15.098	15.366	14.536	9.904	11.607	13.3022					8	34341.9	25.2514
		9	80.872	139.727	141.08	140.062	151.116	130.571					9	9.665	11.524	9.592	10.491	12.528	10.76					9	39989.9	29.4043
		10	94.887	88.388	92.045	108.915	165.011	109.849					10	8.59	8.67	9.727	9.727	7.512	8.8452					10	41641	30.6184
	8	1	107.745	149.036	69.527	127.563	88.526	108.479	113.596			3	1	6.719	8.333	7.5	7.289	6.36	7.2402	9.68084			4	1	27884.7	20.5035	24.8458
		2	88.243	70.539	117.772	175.644	159.724	122.384					2	11.464	10.623	10	8.79	7.906	9.7566					2	34995.1	25.7317
		3	80.039	110.268	116.24	187.129	236.075	145.95					3	8.207	9.1	8.333	8.79	8.047	8.4954					3	31239.2	22.97
		4	70.603	60.467	72.887	85.773	66.844	71.3148					4	9.619	9.583	10.865	10.841	10.905	10.3626					4	29966.9	22.0345
		5	106.23	79.604	71.667	71.744	68.945	79.638					5	10.45	14.148	11.335	10.491	11.932	11.6712					5	39394	28.9662
		6	121.752	114.398	124.911	122.803	112.971	119.367					6	8.186	9.904	7.862	6.509	7.132	7.9186					6	40576.5	29.8357
		7	146.107	116.052	148.333	137.54	174.185	144.443					7	13.604	11.219	9.167	10.712	8.839	10.7082					7	35047.7	25.7704
		8	97.082	116.085	186.73	132.754	122.842	131.099					8	7.5	8.7	10.491	10	12.112	9.7606					8	28480.7	20.9417
		9	168.131	75.369	80.885	83.935	89.513	99.5666					9	5.848	6.68	8.375	10.009	12.112	8.6048					9	39281.8	28.8837
		10	125.044	112.562	115.075	110.079	105.837	113.719					10	11.859	9.619	13.176	12.43	14.367	12.2902					10	31036.5	22.821
	9	1	110.003	123.19	124.972	134.951	112.571	121.137	129.616			4	1	9.904	10.961	11.667	9.167	9.904	10.3206	10.2067		20 ng EE2/g egg	1	1	15658	11.5132	6.77734
		2	105.755	135.082	179.602	166.769	174.716	152.385					2	11.281	10.146	11.071	9.939	8.995	10.2864					2	9506.8	6.99029
		3	181.125	176.171	178.59	142.831	165.582	168.86					3	14.725	12.339	12.937	14.252	11.441	13.1388					3	9082.1	6.67801
		4	127.959	0	0	147.5	200.293	95.1504					4	10.078	12.339	12.672	11.932	11.032	11.6106					4	3840.7	2.82404
		5	154.527	154.403	145.793	124.922	134.797	142.888					5	12.611	10.817	6.897	8.59	8.09	9.401					5	7998.3	5.8811
		6	85.33	66.999	129.77	258.613	183.882	144.919					6	8.858	10.035	11.674	10.623	8.7	9.978					6	-	-
		7	93.158	57.885	100.792	108.541	99.177	91.9106					7	7.66	6.067	7.419	8.67	8.375	7.6382					7	-	-
		8	134.136	142.695	182.517	152.272	153.664	153.057					8	13.463	10.425	7.96	10.905	11.25	10.8006					8	-	-
		9	92.229	100.212	97.845	96.896	100.212	97.4788					9	10.078	11.219	10.425	13.084	9.807	10.9226					9	-	-
		10	135.775	161.012	109.671	116.219	119.175	128.37					10	5.667	9.592	8.333	5	11.258	7.97					10	-	-
	10	1	115.617	79.835	116.649	128.369	150.794	118.253	115.919		20 ng EE2/g egg	1	1	126.2	105.9	99.6	109.7	145.7	117.42	119.988			2	1	45244.5	33.268	28.3231
		2	90.929	66.039	81.245	135.157	91.803	93.0346					2	138	140.1	118.9	141.1	146.6	136.94					2	36969.3	27.1833
		3	122.775	126.343	155.038	151.669	174.119	145.989					3	102	98.5	94.2	81.8	103.2	95.94					3	48171.6	35.4203
		4	91.203	122.885	147.632	168.079	167.602	139.48					4	132.4	86.5	108.9	153.7	124.7	121.24					4	39369.2	28.9479
		5	106.621	106.279	77.374	72.577	82.01	88.9722					5	110.1	100.4	102	132.8	132.6	115.58					5	49609.9	36.4779
		6	68.622	87.436	88.207	100.257	133.793	95.663					6	124.3	121.2	141.7	130.2	136.5	130.78					6	38115.5	28.0261
		7	117.026	107.384	180.035	148.766	118.89	134.42					7	103.8	114.9	115.1	101.3	117.4	110.5					7	31254.8	22.9815
		8	139.057	120.879	97.304	79.809	72.768	101.963					8	113.2	120.9	119.1	94.7	112	111.98					8	28143.3	20.6936
		9	152.217	95.179	203.446	120.445	112.042	136.666					9	97.7	120.2	122.4	119.3	139.5	119.82					9	27941.7	20.5454
		10	113.103	106.888	64.118	120.012	119.635	104.751					10	122.7	143.4	135.4	147	149.9	139.68					10	40373.8	29.6866
1 µg tamoxifen/g egg	1	1	101.064	108.375	86.707	83.075	75.369	90.918	80.2465			2	1	156.4	148.2	160.9	129.6	147.6	148.54	105.493			3	1	6181.4	4.54515	13.3787
		2	88.898	95.525	87.341	104.499	126.801	100.613					2	76	108.8	68.5	63.2	108.8	85.06					2	21782.1	16.0162
		3	101.414	110.545	85.069	15.321	0	62.4698					3	60.2	54.7	72.5	122.3	160.7	94.08					3	18607	13.6816
		4	148.665	139.943	98.672	121.821	111.496	124.119					4	63.9	82.8	80	83.1	70.7	76.1					4	18124.8	13.3271
		5	105.915	128.358	132.552	99.135	97.439	112.68					5	106	92.5	79.8	116.3	93	97.52					5	18728.3	13.7708
		6	0	0	0	0	0	0					6	147.6	120.7	162.4	118.8	108.8	131.66					6	26667.4	19.6084
		7	65.41	66.859	68.945	61.65	54.269	63.4266					7	-	-	-	-	-	-					7	12738.2	9.36632
		8	77.504	74.321	43.748	36.705	69.061	60.2678					8	-	-	-	-	-	-					8	13975.3	10.276
		9	140.801	82.748	50.532	47.966	71.841	78.7776					9	-	-	-	-	-	-					9	26915.7	19.791
		10	114.616	121.678	88.51	102.838	118.325	109.193					10	-	-	-	-	-	-					10	18229.8	13.4043
	2	1	66.427	105.626	170.791	176.131	151.625	134.12	63.9654			3	1	14.7	14.1	15.8	16.1	12.8	14.7	11.6			4	1	26455.6	19.4526	8.31043
		2	0	0	0	0	0	0					2	12.2	9.7	9	11.7	13.7	11.26					2	18953.3	13.9362
		3	0	134.686	160.6	187.116	141.328	124.746					3	12	12.5	8	11.8	10.8	11.02					3	1195.5	0.879044
		4	135.344	99.391	100.544	90.753	68.196	98.8456					4	13	11.5	13.3	13.3	12.3	12.68					4	6609.3	4.85978
		5	0	3.005	0	0	0	0.601					5	9.9	8.9	10.5	7.8	9.5	9.32					5	14460.7	10.6329
		6	46.585	51.343	54.55	40.867	52.526	49.1742					6	10.5	10.3	9.2	9.9	9.2	9.82					6	7825	5.75368
		7	0	0	0	0	0	0					7	11.8	11.2	7.5	10.8	13.9	11.04					7	3615.9	2.65875
		8	78.678	34.661	78.351	74.209	72.462	67.6722					8	10.3	9.9	10	8.5	7.9	9.32					8	-	-
		9	63.651	75.116	99.338	57.161	58.178	70.6888					9	9.6	11.3	16.1	12.4	12.6	12.4					9	-	-
		10	100.056	91.234	83.674	91.428	102.639	93.8062					10	12.7	14.4	14.3	15.6	15.2	14.44					10	-	-
	3	1	98.347	91.803	105.211	158.966	102.622	111.39	85.1664			4	1	7.8	8.8	10.2	9.4	9.3	9.1	9.22			5	1	31944.1	23.4883	27.2866
		2	0	0	0	0	0	0					2	9.2	8.1	11.8	9.3	8.8	9.44					2	32096.2	23.6001
		3	137.26	129.32	145.356	158.142	155.521	145.12					3	7.2	11.6	9.9	10.3	11	10					3	47886.2	35.2104
		4	121.249	132.301	115.293	102.147	95.804	113.359					4	9	8.1	6.6	6.5	9.3	7.9					4	34025.8	25.019
		5	65.431	53.606	57.987	54.594	92.384	64.8004					5	8.6	9.2	10.3	10.6	9.6	9.66					5	39389.4	28.9628
		6	123.19	122.565	122.715	111.52	116.004	119.199					6	-	-	-	-	-	-					6	47551.6	34.9644
		7	145.512	147.064	140.203	129.126	123.384	137.058					7	-	-	-	-	-	-					7	50262.6	36.9578
		8	0	0	0	0	131.173	26.2346					8	-	-	-	-	-	-					8	32042.5	23.5607
		9	88.243	59.867	96.397	90.062	89.073	84.7284					9	-	-	-	-	-	-					9	31252.8	22.98
		10	45.924	52.626	67.711	43.02	39.599	49.776					10	-	-	-	-	-	-					10	24647.1	18.1229
	4	1	69.142	68.257	60.879	60.902	46.383	61.1126	108.778			5	1	6.2	5.6	5.3	7.1	7.1	6.26	5.764			6	1	38814.8	28.5403	32.7487
		2	302.244	354.147	355.764	369.088	374.006	351.05					2	4.7	5.1	3.4	4	4.7	4.38					2	47746.9	35.108
		3	65.219	61.52	59.745	52.208	46.934	57.1252					3	5.3	6.2	6.2	6.2	5.6	5.9					3	52381.5	38.5158
		4	83.807	96.896	117.795	96.875	83.873	95.8492					4	5	6.2	5.3	6.2	7.1	5.96					4	48733.8	35.8337
		5	145.469	81.45	76.924	54.167	48.484	81.2988					5	7.4	5.6	5.9	6.8	5.9	6.32					5	35014.4	25.7459
		6	55.59	59.745	65.933	60.012	0	48.256					6	-	-	-	-	-	-					6	-	-
		7	100.513	100.35	111.679	104.669	116.169	106.676					7	-	-	-	-	-	-					7	-	-
		8	91.382	116.821	103.135	99.17	102.025	102.507					8	-	-	-	-	-	-					8	-	-
		9	62.522	83.6	84.27	65.005	53.34	69.7474					9	-	-	-	-	-	-					9	-	-
		10	103.256	103.769	116.121	120.352	127.301	114.16					10	-	-	-	-	-	-					10	-	-
	5	1	130.197	120.491	132.364	117.169	126.337	125.312	86.5567		0,1 µg tamoxifen/g egg + 20 ng EE2/g egg	1	1	10.2	7.9	10	11.5	11.5	10.22	10.332			7	1	23238.1	17.0868	23.7438
		2	67.546	52.526	53.567	53.34	72.505	59.8968					2	9.8	10.2	10	8.8	10.1	9.78					2	30988.5	22.7857
		3	106.23	114.785	116.393	107.707	112.996	111.622					3	8.2	10.8	8.3	9.6	6.5	8.68					3	31248.6	22.9769
		4	90.015	60.828	0	49.42	45.377	49.128					4	9.6	8.9	9.7	10.3	11.2	9.94					4	39758.9	29.2345
		5	76.035	69.886	77.208	58.035	61.807	68.5942					5	7.2	10.1	9.3	10.5	11.5	9.72					5	36223.4	26.6349
		6	104.197	102.341	106.8	89.338	73.527	95.2406					6	10.8	10.7	11.5	12.4	10	11.08					6	-	-
		7	56.452	49.42	108.044	97.582	77.118	77.7232					7	10.3	10.2	10	11	8.2	9.94					7	-	-
		8	80.941	101.002	97.674	76.057	114.552	94.0452					8	11.8	10.9	12.4	11.5	12.3	11.78					8	-	-
		9	56.746	62.188	62.277	51.058	65.245	59.5028					9	8	10.2	11.4	12.1	11.9	10.72					9	-	-
		10	136.142	126.765	96.195	130.908	132.503	124.503					10	11.8	10	11.2	11.3	13	11.46					10	-	-
	6	1	131.529	132.565	95.015	97.557	83.35	108.003	81.6645			2	1	7.4	6.5	5.6	5.9	5.9	6.26	7.474		0,1 µg tamoxifen/g egg + 20 ng EE2/g egg	1	1	42848.5	31.5063	29.449
		2	36.056	34.731	46.135	44.355	35.04	39.2634					2	7.7	11.9	9	11	8	9.52					2	43285.5	31.8276
		3	137.237	152.375	155.753	117.275	93.868	131.302					3	7.5	4.6	5.9	5.6	6	5.92					3	39963.4	29.3849
		4	0	0	0	98.164	128.652	45.3632					4	9.2	7.5	6.9	7.2	8.2	7.8					4	33780	24.8382
		5	112.808	100.031	81.667	102.585	76.739	94.766					5	8.7	7.1	7.5	8.7	7.8	7.96					5	46336	34.0706
		6	0	0	0	0	0	0					6	7.4	6.8	9	6.9	6.1	7.24					6	40851.1	30.0376
		7	0	0	0	0	0	0					7	7.4	8.2	7.9	8.4	6.8	7.74					7	39205.8	28.8278
		8	156.607	164.96	152.154	130.259	153.713	151.539					8	4.4	6.8	7.1	7.4	7.4	6.62					8	37104.1	27.2824
		9	132.937	123.615	105.951	135.721	103.876	120.42					9	8.1	9.6	9	10.2	7.8	8.94					9	36582.9	26.8992
		10	138.122	131.173	109.17	121.301	130.181	125.989					10	7.4	7.7	6.8	5.3	6.5	6.74					10	40549.3	29.8157
	7	1	106.448	156.056	129.928	98.717	87.373	115.704	89.9527			3	1	6.8	5.9	6.8	5.4	5.9	6.16	8.048			2	1	32171.3	23.6554	24.2218
		2	60.65	55.409	76.016	90.466	125.044	81.517					2	8.9	6.3	6.1	9.2	10.7	8.24					2	28312.4	20.8179
		3	152.154	93.96	97.582	95.452	87.599	105.349					3	9.3	8.7	6.8	7.1	8.7	8.12					3	27289.6	20.0659
		4	120.488	95.452	148.404	107.138	112.67	116.83					4	7.5	9.3	7.2	8.2	8.4	8.12					4	35583.1	26.164
		5	67.464	69.572	72.768	88.337	74.209	74.47					5	10.5	7.1	9	8.1	8.2	8.58					5	35398.6	26.0284
		6	68.012	74.842	94.711	79.552	87.21	80.8654					6	7.6	7.1	7.4	8.7	8.7	7.9					6	37327.2	27.4465
		7	47.529	50.139	68.089	55.202	49.195	54.0308					7	7.4	8.4	8.1	8.3	5.9	7.62					7	39351.3	28.9348
		8	134.686	106.67	109.151	107.047	95.779	110.667					8	7.4	8.1	11.5	8.1	6.8	8.38					8	34627.7	25.4615
		9	128.171	78.938	95.004	129.808	127.685	111.921					9	10.3	10.6	9.3	8	9.7	9.58					9	28518.4	20.9694
		10	55.989	57.057	51.004	39.308	37.5	48.1716					10	7.4	6.2	7.3	9.9	8.1	7.78					10	30836.5	22.6739
	8	1	97.557	97.304	109.573	94.358	105.686	100.896	89.7128			4	1	7.1	7	6.6	7	9.2	7.38	9.42			3	1	34284.3	25.209	27.0877
		2	61.92	65.744	79.18	123.156	219.054	109.811					2	10.2	9	9.3	8.7	8.7	9.18					2	46824.8	34.43
		3	0	0	0	127.176	135.303	52.4958					3	7.3	10.1	8.3	6.6	6.5	7.76					3	38094.5	28.0107
		4	141.09	112.75	133.333	174.169	178.335	147.935					4	7.7	8	7.8	7.8	11.5	8.56					4	33998.2	24.9987
		5	44.001	84.344	76.126	61.942	112.623	75.8072					5	12.1	9.3	15	13.3	11.8	12.3					5	26461.7	19.4571
		6	96.195	92.833	93.341	141.316	143.783	113.494					6	9	8.3	9.9	11.8	10.5	9.9					6	45471.6	33.435
		7	0	0	0	35.872	37.454	14.6652					7	12.9	12.4	14	12.5	12.7	12.9					7	36948.5	27.168
		8	40.389	45.522	42.704	40.078	0	33.7386					8	6.4	6.2	8.1	8.1	8.7	7.5					8	28084.1	20.6501
		9	133.375	120.836	112.75	124.477	104.043	119.096					9	10.7	9.3	10.5	9.9	12.4	10.56					9	41072.7	30.2005
		10	127.285	113.703	135.844	146.603	122.511	129.189					10	7.2	8.4	9	7.2	9	8.16					10	37152.9	27.3183
	9	1	55.334	74.031	84.282	81.926	93.11	77.7366	97.4392			5	1	12.5	8.9	11.2	11.1	10.1	10.76	10.712			4	1	35235	25.9081	28.0901
		2	96.007	109.322	75	88.349	88.51	91.4376					2	7.5	8.6	7.8	7.3	6.1	7.46					2	35865.2	26.3715
		3	73.772	68.445	61.334	76.834	87.242	73.5254					3	10.3	9.7	8.6	11.4	9.1	9.82					3	43198.5	31.7636
		4	151.063	180.849	145.435	163.811	157.449	159.721					4	10.5	12.7	12.9	12.5	13.3	12.38					4	40230.8	29.5815
		5	150.113	140.04	138.343	148.523	157.872	146.978					5	10.5	10.2	12.9	12.3	14.3	12.04					5	37372.2	27.4796
		6	49.721	44.386	101.424	134.786	178.403	101.744					6	14.8	13	9.8	9	9.6	11.24					6	37594.7	27.6432
		7	47.668	57.524	57.939	50.69	86.039	59.972					7	17.3	18.4	12.9	13.4	15.2	15.44					7	34373.5	25.2746
		8	0	0	52.068	40.069	0	18.4274					8	7.7	10	7.3	6.7	7.2	7.78					8	47374.4	34.8341
		9	160.089	151.174	93.311	88.855	102.879	119.262					9	7.1	6.6	6.9	7.1	5.6	6.66					9	35197.7	25.8807
		10	109.195	120.026	116.679	124.169	157.872	125.588					10	12.4	14.6	14.4	14.2	12.1	13.54					10	35583.6	26.1644
	10	1	100.003	86.731	95.964	100.056	127.544	102.06	101.448			6	1	7.9	6.4	6.6	7	7.6	7.1	7.944			5	1	43188	31.7559	28.7463
		2	75.888	73.053	89.042	78.762	75.572	78.4634					2	8.8	8	8.4	9.2	10.8	9.04					2	46098.8	33.8962
		3	156.156	116.649	109.804	89.482	99.878	114.394					3	8.1	8.6	8.5	9.2	12.4	9.36					3	37018.8	27.2197
		4	138.877	166.771	137.941	124.903	105.175	134.733					4	6.2	4.9	6	6.8	4.9	5.76					4	32404.5	23.8268
		5	73.419	76.399	78.351	80.666	77.84	77.335					5	9.4	7.4	8.4	7.5	9.6	8.46					5	45587.7	33.5204
		6	118.641	99.474	0	96.724	72.806	77.529					6	-	-	-	-	-	-					6	42576.2	31.306
		7	99.878	64.334	72.538	207.272	172.643	123.333					7	-	-	-	-	-	-					7	32196.9	23.6742
		8	78.351	0	83.008	81.394	69.96	62.5426					8	-	-	-	-	-	-					8	33658.6	24.749
		9	116.348	126.669	106.177	129.532	106.125	116.97					9	-	-	-	-	-	-					9	28077.5	20.6452
		10	147.205	122.071	121.912	129.939	114.461	127.118					10	-	-	-	-	-	-					10	50142.7	36.8696
10 µg tamoxifen/g egg	1	1	0	0	0	0	0	0	73.9698		1 µg tamoxifen/g egg + 20 ng EE2/g egg	1	1	7.2	6.6	6.8	7	7.5	7.02	9.372			6	1	35530.6	26.1254	28.4191
		2	0	0	227.787	0	0	45.5574					2	8.1	7.7	10	10	8.5	8.86					2	37924.1	27.8854
		3	0	0	238.696	231.193	0	93.9778					3	9.1	9.3	11.2	9	10.1	9.74					3	36104.7	26.5476
		4	190.194	215.796	216.836	274.187	386.049	256.612					4	9.2	10.9	9.4	8.4	8.8	9.34					4	37976.2	27.9237
		5	0	0	0	0	0	0					5	10.1	7.1	10.3	8.1	9.9	9.1					5	45714.3	33.6135
		6	30.641	32.414	28.013	0	0	18.2136					6	9.5	7.5	11.1	7.4	7.5	8.6					6	-	-
		7	96.209	85.797	51.673	106.095	85.347	85.0242					7	11.5	8.7	8.5	10.8	11.2	10.14					7	-	-
		8	66.421	40.311	74.209	101.259	125.1	81.46					8	7.7	11.4	11.2	10	12.5	10.56					8	-	-
		9	97.504	112.904	136.201	156.436	217.685	144.146					9	9.6	12.9	11.6	11.6	10.9	11.32					9	-	-
		10	0	0	0	0	73.532	14.7064					10	6.5	10.3	9.5	9.2	9.7	9.04					10	-	-
	2	1	0	0	0	0	0	0	59.2549			2	1	8.1	7.2	7.1	8.6	10.6	8.32	7.802		1 µg tamoxifen/g egg + 20 ng EE2/g egg	1	1	33390.3	24.5517	22.6613
		2	0	0	0	0	0	0					2	10.3	6.3	6.5	7.4	8.7	7.84					2	29155.9	21.4382
		3	102.069	101.503	164.014	103.592	137.783	121.792					3	6.4	8.3	7.5	8.8	8.7	7.94					3	28234.4	20.7606
		4	140.369	105.363	0	0	0	49.1464					4	9.3	7.7	7	8.7	6.6	7.86					4	33169	24.389
		5	170.884	202.389	173.167	198.007	179.494	184.788					5	8.5	6.2	8.1	7.8	8.1	7.74					5	34118.1	25.0868
		6	0	0	0	0	115.244	23.0488					6	11	7.4	9.9	9.1	10.1	9.5					6	28265.6	20.7835
		7	150.416	193.427	167.141	115.77	93.515	144.054					7	7.4	5.6	5.3	5.9	5.6	5.96					7	33275.2	24.4671
		8	0	0	0	0	0	0					8	5	6	7.2	6.7	8.3	6.64					8	29877.4	21.9687
		9	0	0	0	0	0	0					9	7.1	4.6	7.4	6.4	6.5	6.4					9	34308.4	25.2268
		10	0	0	96.011	123.378	129.21	69.7198					10	10	9.7	9.8	8.9	10.7	9.82					10	24399.7	17.941
	3	1	183.381	127.563	94.868	100.281	61.401	113.499	73.0199			3	1	7.8	7.9	8	7.1	8.2	7.8	8.54			2	1	39396.1	28.9677	24.2245
		2	130.387	151.467	145.605	159.103	160.49	149.41					2	8.1	7.4	7.5	8.4	7.2	7.72					2	27431.3	20.1701
		3	150.453	169.771	231.135	196.327	173.015	184.14					3	9.5	11.5	10.1	10.7	10.4	10.44					3	33000.3	24.2649
		4	118.676	0	0	0	0	23.7352					4	10.1	11.2	8.5	9.6	10.8	10.04					4	28674.3	21.084
		5	0	0	0	0	113.774	22.7548					5	5.9	5.6	7.4	7.1	7.5	6.7					5	44657.8	32.8366
		6	0	0	0	0	0	0					6	-	-	-	-	-	-					6	32864.4	24.165
		7	183.987	165.634	155.78	150.416	146.735	160.51					7	-	-	-	-	-	-					7	31262.4	22.9871
		8	0	0	0	0	0	0					8	-	-	-	-	-	-					8	39237.2	28.8509
		9	0	0	0	0	0	0					9	-	-	-	-	-	-					9	23977	17.6301
		10	0	0	107.797	139.866	133.083	76.1492					10	-	-	-	-	-	-					10	28952	21.2882
	4	1	55.239	41.85	58.482	82.365	98.39	67.2652	59.5189		10 µg tamoxifen/g egg + 20 ng EE2/g egg	1	1	8.4	9.7	8.1	7.8	8.4	8.48	9.074			3	1	34451	25.3316	25.7648
		2	154.295	116.363	79.197	169.372	212.467	146.339					2	9.7	6.9	5.7	9.9	6.5	7.74					2	38267.6	28.1379
		3	0	0	0	0	0	0					3	11.6	9	7.8	6.7	6.1	8.24					3	36881.4	27.1187
		4	0	0	0	0	0	0					4	7.8	8.7	6.2	8.4	9.9	8.2					4	29753.7	21.8777
		5	0	0	0	0	25.194	5.0388					5	9	10.5	10.8	8.7	9.3	9.66					5	35846.8	26.3579
		6	0	0	0	0	0	0					6	11.5	11.5	10.8	12.7	12.1	11.72					6	-	-
		7	45.765	89.447	110.68	127.978	135.208	101.816					7	7.4	6.2	7.8	9	9.9	8.06					7	-	-
		8	114.069	113.162	119.353	105.492	97.699	109.955					8	6.9	8.7	8.6	8	8.7	8.18					8	-	-
		9	57.039	69.347	97.781	92.233	85.688	80.4176					9	11.5	12.6	12	7.8	10.9	10.96					9	-	-
		10	126.735	121.532	77.746	38.909	56.869	84.3582					10	10.9	9	9.2	10.5	7.9	9.5					10	-	-
	5	1	132.565	116.964	93.337	100.031	91.295	106.838	87.3843			2	1	9.4	9.3	9	11.2	9.6	9.7	9.486		10 µg tamoxifen/g egg + 20 ng EE2/g egg	1	1	38002.1	27.9427	28.4684
		2	185.79	246.117	220.361	0	0	130.454					2	11.5	9.5	9	9	9.9	9.78					2	44969.5	33.0658
		3	0	0	0	0	0	0					3	9.6	9.6	8.4	8.5	8.1	8.84					3	35246.7	25.9167
		4	91.078	97.272	62.65	0	0	50.2					4	10.2	12.7	10.6	8.4	10.1	10.4					4	45342	33.3397
		5	238.579	208.475	234.864	230.051	265.131	235.42					5	8.7	9.6	8.9	9.2	9.7	9.22					5	44067.2	32.4024
		6	151.44	162.001	151.863	121.487	111.371	139.632					6	7.7	7.6	6.8	7.7	8.1	7.58					6	45320.8	33.3241
		7	0	0	0	0	0	0					7	12.1	13.9	12.7	10.5	7.8	11.4					7	39001.7	28.6777
		8	111.716	98.559	79.796	79.46	130.013	99.9088					8	9.7	9.3	9.1	9.2	9	9.26					8	34118.2	25.0869
		9	86.995	84.327	126.428	126.735	132.466	111.39					9	9	10.3	10.4	10.5	8.5	9.74					9	36427.8	26.7851
		10	0	0	0	0	0	0					10	9.7	9.2	10	7	8.8	8.94					10	24674.7	18.1432
20 ng EE2/g egg	1	1	91.3	113.1	114.3	138.7	168.9	125.26	129.57			3	1	6.5	6.6	6.2	6.8	7	6.62	7.644			2	1	45862.1	33.7221	29.5799
		2	129.8	157.3	178	247.2	98.6	162.18					2	7.2	5.6	6.7	8.5	8	7.2					2	32781.6	24.1041
		3	110.5	111.9	114.4	131.1	139	121.38					3	10.4	9.4	8.3	8.7	8.7	9.1					3	42145.1	30.989
		4	124.9	114.1	118.8	104.5	122.8	117.02					4	7.7	5.9	6.5	5.3	5.9	6.26					4	40740.3	29.9561
		5	101.9	92	144.3	176.3	91	121.1					5	6.9	5.6	6.8	7.1	5	6.28					5	37696.1	27.7177
		6	129.8	144.2	182.6	126.6	141.2	144.88					6	7.4	6.1	10.8	9.9	8.8	8.6					6	39498.6	29.0431
		7	157.9	150.9	135.5	133.9	124.7	140.58					7	7.4	6.8	6.3	7.1	6.8	6.88					7	45343.7	33.341
		8	117.3	139.6	121.5	128.5	129.1	127.2					8	8.4	9	15.2	10.6	6.2	9.88					8	42958.5	31.5871
		9	93.5	99.5	100.6	158.9	120.9	114.68					9	6.8	7.3	4.3	7.7	8.5	6.92					9	41976.3	30.8649
		10	108.2	116.3	111.7	139.2	131.7	121.42					10	8.1	8.8	10.1	8.3	8.2	8.7					10	33284.8	24.4741
	2	1	182.8	147.3	134.7	179.7	204.2	169.74	141.082			4	1	8.1	5.9	9.3	7.4	6.8	7.5	10.205			3	1	28972	21.3029	19.582
		2	153	167.3	141.8	149.2	144.3	151.12					2	14.6	8.1	10.9	11.9	13	11.7					2	19508	14.3441
		3	125.8	140.6	153.1	131.2	127.1	135.56					3	11.1	10.4	9.5	9.6	11.3	10.38					3	33111	24.3463
		4	119.4	103.2	90.6	88.2	85.5	97.38					4	11.3	13.7	12.7	10.5	13.3	12.3					4	23027	16.9316
		5	140	147.7	169.8	126.3	153.4	147.44					5	8.7	8.8	12.4	11.1	7.7	9.74					5	31889	23.4478
		6	168.8	165.7	168	158.6	165.8	165.38					6	9.9	8.4	9.3	7.1	9.6	8.86					6	18146	13.3426
		7	154.2	159.1	145.3	132.2	156.6	149.48					7	8.4	9.2	10.2	7.4	6.5	8.34					7	36664	26.9588
		8	147.6	167.6	140.8	156.7	133.9	149.32					8	14.6	11	12.6	14.7	11.2	12.82					8	25426	18.6956
		9	168.5	140.2	168	144.7	170.1	158.3					9	-	-	-	-	-	-					9	19707	14.4904
		10	103.5	48	101.3	83.7	99	87.1					10	-	-	-	-	-	-					10	29865	21.9596
0,1 µg tamoxifen/g egg + 20 ng EE2/g egg	1	1	150.5	173.1	131.9	127	96.2	135.74	121.812			5	1	9.6	8.3	8	9.9	8.7	8.9	9.212			4	1	36784.7	27.0476	21.3525
		2	132.9	128.4	127.8	96.8	92.4	115.66					2	6.6	7.5	9.8	8.1	9.2	8.24					2	37929.3	27.8892
		3	122.9	127.9	126.9	170.5	137.2	137.08					3	8.7	9.6	10	10.3	11.3	9.98					3	30672.6	22.5534
		4	116.1	111	116.1	184.9	146.2	134.86					4	9.9	7.4	8.2	9.9	8.7	8.82					4	25562.1	18.7957
		5	137.7	128.5	127.5	119.9	121.7	127.06					5	9.9	8.4	10.4	11.2	10.7	10.12					5	22886	16.8279
		6	114.6	123	132.7	116	140.8	125.42					6	-	-	-	-	-	-					6	28764.1	21.1501
		7	93.3	126.5	103.2	103	132.5	111.7					7	-	-	-	-	-	-					7	25503	18.7522
		8	87.4	115.2	117.6	108.3	113.7	108.44					8	-	-	-	-	-	-					8	24213.6	17.8041
		9	90.7	95.2	92.4	115.9	100.1	98.86					9	-	-	-	-	-	-					9	-	-
		10	134.7	121	112.7	128.4	119.7	123.3					10	-	-	-	-	-	-					10	-	-
	2	1	142.7	129.8	142.7	171.9	151.3	147.68	142.55			6	1	4.6	5.7	5.3	8.2	6.9	6.14	7.076			5	1	34939.2	25.6906	25.0379
		2	120.9	112.1	110	125.2	136.7	120.98					2	7.4	5.6	7.7	8.1	8.4	7.44					2	38821.7	28.5454
		3	150.8	132.2	155.8	158.4	154.8	150.4					3	7.2	6.8	8.1	8.4	10.8	8.26					3	30930	22.7426
		4	136.8	121.2	118.4	119.4	147.8	128.72					4	5.9	9.3	8.4	5	6.9	7.1					4	34455.1	25.3346
		5	170.5	163.1	137.9	170	160.6	160.42					5	4.6	6.5	6.5	8.4	6.2	6.44					5	31112	22.8765
		6	167.2	163	151	148.5	152.5	156.44					6	-	-	-	-	-	-					6	-	-
		7	124.7	124	126.7	103.9	166.9	129.24					7	-	-	-	-	-	-					7	-	-
		8	145.7	147.5	142.2	183.2	144	152.52					8	-	-	-	-	-	-					8	-	-
		9	132.2	132.5	153.2	134.4	149.7	140.4					9	-	-	-	-	-	-					9	-	-
		10	129.6	126.1	142.2	144.3	151.3	138.7					10	-	-	-	-	-	-					10	-	-
	3	1	113.3	151.7	130.8	140.4	139.6	135.16	133.634														6	1	44826.3	32.9605	28.4703
		2	149.9	196.1	118.9	149.3	97.6	142.36																2	41275.7	30.3498
		3	91.9	139.6	161.3	144.4	164.5	140.34																3	39696.4	29.1885
		4	178.9	155.8	140.2	108.2	124.2	141.46																4	29539.3	21.7201
		5	147.2	152.1	122.6	124.8	107.8	130.9																5	38260.4	28.1326
		6	126.6	140.3	136.1	111.3	116	126.06																6	-	-
		7	136.1	146.3	124.9	144.4	88.9	128.12																7	-	-
		8	144.6	122.3	102.9	127.8	141.4	127.8																8	-	-
		9	158.5	155.9	165.8	113.8	99.1	138.62																9	-	-
		10	119.6	129	135.8	120	123.2	125.52																10	-	-
1 µg tamoxifen/g egg + 20 ng EE2/g egg	1	1	92.5	109.1	131.5	169.3	177.7	136.02	149.05
		2	103.5	157.6	174.3	174.7	157.3	153.48
		3	176.4	182.2	157.3	131.8	101.5	149.84
		4	167.1	163.2	138.1	111.9	116.8	139.42
		5	152	150.8	127.7	138.1	160.4	145.8
		6	159.4	130.9	119.1	124.4	108	128.36
		7	145.5	133.5	143.8	145.2	141.7	141.94
		8	142.7	141.4	164.3	148.3	184.7	156.28
		9	174.7	171.5	158.2	141.7	166	162.42
		10	143.4	170.6	173.9	190.9	205.9	176.94
	2	1	119.5	107.3	132.7	147.8	140.4	129.54	127.942
		2	129.6	140	155.7	154.2	170.2	149.94
		3	81.5	123.7	157.8	123.5	179.8	133.26
		4	84.8	110.5	164.2	114.8	107.5	116.36
		5	94.4	134.7	183.6	214.6	86.8	142.82
		6	113.2	82.6	159.3	163.8	167.5	137.28
		7	117	106.7	111.7	96.4	138.2	114
		8	116	116	100.4	147.9	103.1	116.68
		9	114.4	123.9	131.3	159.7	84.5	122.76
		10	118.6	126.9	148.1	126.2	64.1	116.78
10 µg tamoxifen/g egg + 20 ng EE2/g egg	1	1	114	144.8	101.4	115.3	121.9	119.48	134.438
		2	133.5	149.6	126.7	126.5	119.2	131.1
		3	130.4	128	135.7	144.2	154.6	138.58
		4	137.8	125	146.3	141.1	152.8	140.6
		5	141.1	140.4	133.4	126.4	137.8	135.82
		6	126.5	113.4	120.3	127.3	135.7	124.64
		7	135.6	157.4	146.7	155.3	145.4	148.08
		8	142.5	125.1	131.1	165.3	140.9	140.98
		9	106.2	127.3	140.1	139.6	166.6	135.96
		10	125.3	144	130.7	126.7	119	129.14
[truncated: 10 more columns]

## Sheet: tamoxifen experiment no. 4
substance:	tamoxifen										substance:	tamoxifen										substance:	tamoxifen						substance:	tamoxifen				substance:	tamoxifen				substance:	tamoxifen						substance:	tamoxifen
experiment no.:	4										experiment no.:	4										experiment no.:	4						experiment no.:	4				experiment no.:	4				experiment no.:	4						experiment no.:	4
endpoint:	cortex thickness [µm]										endpoint:	cortex thickness [µm]										endpoint:	seminiferous tubules [%]		total area of picture=	136000	µm² = 100%		endpoint:	gonad surface area [mm²]				endpoint:	gonad surface area [mm²]				endpoint:	mortality [%]						endpoint:	malformations
genetic sex:	female										genetic sex:	male										genetic sex:	male						genetic sex:	female				genetic sex:	male				genetic sex:	male + female						genetic sex:	male + female
test group	embryo no.	slice no.	values measured on slice [µm]					slice mean [µm]	embryo mean [µm]		test group	embryo no.	slice no.	values measured on slice [µm]					slice mean [µm]	embryo mean [µm]		test group	embryo no.	slice no.	slice mean [µm²]	slice mean [%]	embryo mean [%]		test group	embryo no.	left ovary [mm²]	right ovary [mm²]		test group	embryo no.	left testis [mm²]	right testis [mm²]		test group	∑ eggs	∑ infertilized eggs	∑ vital embryos	∑ mortal embryos	mortal embryos [%]		test group	∑ fertilized eggs	∑malformed embryos	∑ malformations
			1	2	3	4	5							1	2	3	4	5
untreated control	1	1	119.864	95.398	99.009	131.556	95.048	108.175	139.532		untreated control	1	1	15.092	10.138	10.138	11.932	13.794	12.2188	16.0527		untreated control	1	1	35526.2	26.1222	28.0225		untreated control	1	10.6625	1.89		untreated control	1	5.40302	3.97364		untreated control	25	0	21	4	16		untreated control	25	0	0
		2	93.393	126.057	103.619	109.218	124.245	111.306					2	11.932	15.023	15.023	11.932	14.554	13.6928					2	37147.6	27.3144				2	7.81401	2.5042			2	3.22532	2.96078		solvent control	26	2	18	6	25		solvent control	24	1	2
		3	130.963	125.222	132.34	89.617	97.898	115.208					3	15.921	13.566	12.5	12.528	13.044	13.5118					3	40055.4	29.4525				3	9.79157	2.01487			3	2.96341	3.18397		20 ng EE2/g egg	32	2	23	7	23.3333		20 ng EE2/g egg	30	2	3
		4	118.662	128.628	128.628	139.346	104.007	123.854					4	16.604	15.023	16.029	14.767	15.855	15.6556					4	35357.3	25.998				4	10.6043	2.17988			4	4.34607	4.30964		0,001 µg tamoxifen/g egg + 20 ng EE2/g egg	30	2	26	2	7.14286		0,001 µg tamoxifen/g egg + 20 ng EE2/g egg	28	2	2
		5	101.742	142.795	117.059	134.91	118.14	122.929					5	17.989	13.176	16.604	16.415	13.463	15.5294					5	29125.9	21.4161				5	8.87634	2.04224			5	3.81901	3.84511		0,01 µg tamoxifen/g egg + 20 ng EE2/g egg	31	1	24	6	20		0,01 µg tamoxifen/g egg + 20 ng EE2/g egg	30	1	2
		6	159.489	241.703	245.239	214.531	218.392	215.871					6	15.568	20.429	21.082	15.723	15.723	17.705					6	43309.7	31.8454				6	10.4995	1.84845			6	4.1691	4.28569		0,1 µg tamoxifen/g egg + 20 ng EE2/g egg	31	1	21	9	30		0,1 µg tamoxifen/g egg + 20 ng EE2/g egg	30	2	2
		7	134.611	130	127.465	149.039	125.966	133.416					7	17.658	15.092	15.023	18.276	16.008	16.4114					7	42213.2	31.0391			solvent control	1	10.7947	1.81273			7	3.57823	3.42609		1 µg tamoxifen/g egg + 20 ng EE2/g egg	32	2	22	8	26.6667		1 µg tamoxifen/g egg + 20 ng EE2/g egg	30	2	2
		8	124.108	111.287	133.547	129.663	156.349	130.991					8	16.997	20.276	18.634	20.616	18.447	18.994					8	36084.6	26.5328				2	6.60304	1.40451			8	4.9504	4.78703		10 µg tamoxifen/g egg + 20 ng EE2/g egg	32	3	22	7	24.1379		10 µg tamoxifen/g egg + 20 ng EE2/g egg	29	3	3
		9	234.948	227.498	219.747	216.873	153.145	210.442					9	17.834	20.035	19.329	17.834	18.333	18.673					9	42213.7	31.0395				3	11.3656	2.29637			9	3.76495	3.38876
		10	127.088	118.536	121.166	126.123	122.715	123.126					10	13.744	17.579	17.678	20.429	21.246	18.1352					10	40071.9	29.4646				4	8.82681	2.00617			10	3.5499	3.91002
	2	1	133.866	172.373	199.892	193.443	186.466	177.208	173.058			2	1	10.017	9.904	10.937	9.754	11.335	10.3894	9.91328			2	1	50567.7	37.1821	34.405			5	10.5772	1.51242			11	3.20501	2.70367
		2	177.486	186.735	155.836	193.398	155.271	173.745					2	11.118	11.219	11.851	10.712	10.905	11.161					2	45166.1	33.2104				6	9.2213	1.5606			12	3.13452	3.09585
		3	174.105	187.359	159.535	179.122	155.635	171.151					3	8.207	10.069	8.385	8.385	9.904	8.99					3	49278.3	36.234				7	9.4362	2.14166			13	4.10314	3.75736
		4	288.629	206.184	168.36	134.229	114.431	182.367					4	13.024	10.549	8.995	12.026	9.904	10.8996					4	40354.9	29.6727				8	7.95985	2.03725		solvent control	1	3.95457	3.43144
		5	145.926	152.5	168.525	166.535	173.909	161.479					5	11.607	9.904	11.464	7.66	10.069	10.1408					5	47553.5	34.9658				9	8.00461	1.433			2	3.76904	2.79521
		6	180.897	177.051	176.456	181.904	205.135	184.289					6	12.863	13.418	8.207	7.083	10.541	10.4224					6	51811.1	38.0964				10	9.00112	1.7587			3	3.4794	3.41292
		7	153.851	145.664	197.007	184.421	132.898	162.768					7	9.363	10.541	8.829	9.52	10.541	9.7588					7	40278.3	29.6164				11	7.16077	1.25335			4	4.48193	3.51383
		8	161.969	198.512	187.309	176.702	151.497	175.198					8	11.607	10.308	8.829	8.59	9.754	9.8176					8	50022.2	36.781			20 ng EE2/g egg	1	9.1176	1.68132			5	3.90861	3.80607
		9	184.189	140.102	228.006	209.902	154.895	183.419					9	9.363	9.1	9.52	7.512	9.1	8.919					9	41668.8	30.6388				2	9.36975	2.03656			6	3.6917	3.71951
		10	186.73	178.516	153.306	146.79	129.435	158.955					10	7.383	9.223	9.619	8.76	8.186	8.6342					10	51206.9	37.6522				3	10.2131	1.52003			7	3.6714	3.27506
	3	1	130.219	201.281	161.376	164.876	173.399	166.23	157.27			3	1	7.546	6.374	6.68	5	7.096	6.5392	6.63304			3	1	54997.9	40.4396	34.6037			4	9.404	1.87954		20 ng EE2/g egg	1	4.5635	4.14247
		2	119.333	132.382	147.904	90.389	92.169	116.435					2	5.893	6.985	7.683	5.417	5.966	6.3888					2	44897.6	33.0129				5	9.95018	1.84816			2	5.2155	3.97003
		3	143.493	171.128	204.255	141.441	176.277	167.319					3	5.803	5.833	4.488	5.433	4.167	5.1448					3	53138.9	39.0727				6	9.24978	1.77253			3	7.088	4.46673
		4	114.276	98.093	114.807	123.693	96.451	109.464					4	5.559	4.658	7.683	7.12	6.346	6.2732					4	48500.5	35.6621				7	7.60024	0.955979			4	7.84127	3.52317
		5	167.631	193.681	186.572	173.117	184.157	181.032					5	6.468	7.277	7.277	7.083	5.154	6.6518					5	35815.8	26.3351				8	9.37723	1.38288			5	5.22316	3.99279
		6	123.606	140.258	156.802	175.918	177.032	154.723					6	8.302	8.207	7.096	7.096	6.783	7.4968					6	48522.7	35.6785				9	8.43635	1.49167			6	7.94587	3.61392
		7	182.195	180.056	186.674	204.649	170.239	184.763					7	5.848	9.583	8.344	9.014	8.59	8.2758					7	46320.5	34.0592				10	7.18702	1.5841			7	7.97093	3.77922
		8	181.311	197.409	118.585	187.707	222.063	181.415					8	5.154	5.154	4.751	6.468	5.789	5.4632					8	48653.6	35.7747				11	7.25565	1.76242			8	7.05153	4.08321
		9	128.16	162.5	157.244	194.168	167.715	161.957					9	5.221	5.667	7.383	4.658	5.417	5.6692					9	48654.9	35.7756				12	9.15943	1.87106			9	7.89716	4.03599
		10	123.749	158.572	165.008	168.737	130.746	149.362					10	10.035	7.603	7.277	7.906	9.317	8.4276					10	41107.6	30.2262			0,001 µg tamoxifen/g egg + 20 ng EE2/g egg	1	9.02886	2.27261			10	3.96921	2.91776
	4	1	188.792	243.613	266.271	221.649	218.978	227.861	170.509			4	1	10.841	8.839	9.223	8.218	11.25	9.6742	8.89278			4	1	43533.9	32.0102	27.1316			2	11.6764	2.01924			11	8.85195	3.26093
		2	131.215	175.507	151.593	119.248	231.475	161.808					2	10.442	11.18	9.138	7.96	10.017	9.7474					2	32295.7	23.7468				3	10.9088	2.05261		0,001 µg tamoxifen/g egg + 20 ng EE2/g egg	1	4.06558	3.75529
		3	187.567	186.029	179.515	214.502	178.561	189.235					3	12.148	11.733	8.839	7.603	7.683	9.6012					3	35117.4	25.8216				4	10.4427	1.58566			2	4.27037	4.38727
		4	144.299	155.78	155.925	143.935	226.523	165.292					4	9.138	9.691	12.367	9.148	9.501	9.969					4	41729	30.6831				5	7.47858	1.07971			3	4.33202	3.80228
		5	130.876	146.299	160.425	158.826	129.62	145.209					5	11.441	11.844	10.316	8.858	9.014	10.2946					5	46027.1	33.8434				6	9.31826	2.1076			4	5.55691	3.23621
		6	183.079	218.348	208.6	206.118	192.303	201.69					6	9.691	10.069	8.385	8.385	9.014	9.1088					6	37905	27.8713				7	7.54454	3.06469			5	5.00357	3.21505
		7	120.234	179.36	175.097	174.676	131.793	156.232					7	7.096	8.271	8.917	6.783	7.419	7.6972					7	28943.1	21.2817				8	8.68761	1.45137			6	7.12954	4.19579
		8	222.999	206.037	191.358	131.075	81.181	166.53					8	6.152	6.783	7.419	8.858	5.017	6.8458					8	28597.6	21.0276				9	8.70523	2.47375			7	9.68598	3.59823
		9	122.588	120.833	140.892	177.531	172.583	146.885					9	6.897	6.522	8.67	8.333	9.176	7.9196					9	36632.5	26.9356				10	7.57072	1.6424			8	6.84139	3.94825
		10	145.497	134.128	178.92	141.63	121.567	144.348					10	7.66	9.252	8.015	7.419	8.004	8.07					10	38208.3	28.0944				11	7.57897	2.04387			9	4.79685	3.70308
	5	1	120.672	132.772	112.182	154.349	160.635	136.122	136.905			5	1	7.277	7.132	5.417	5.966	5.966	6.3516	7.23724			5	1	56688	41.6824	36.0111			12	8.25528	1.59503			10	5.64091	3.42988
		2	141.033	149.316	129.492	122.412	114.237	131.298					2	8.75	7.096	6.719	7.5	9.727	7.9584					2	47616	35.0117			0,01 µg tamoxifen/g egg + 20 ng EE2/g egg	1	9.05654	2.06547			11	7.20598	3.59258
		3	109.646	125.477	130.451	118.863	106.8	118.247					3	6.25	8.047	7.096	9.204	6.346	7.3886					3	47791	35.1404				2	10.2141	1.99234			12	4.3724	2.83983
		4	132.668	141.728	143.394	170.852	160.366	149.802					4	6.346	6.588	5.59	6.264	5.59	6.0756					4	59013.2	43.3921				3	9.01576	1.2938			13	7.29833	3.92319
		5	135.434	141.858	139.107	163.157	138.168	143.545					5	6.305	5.667	7.096	8.09	6.719	6.7754					5	58167.5	42.7702				4	9.1624	1.65616			14	4.17356	2.89961
		6	129.234	139.054	126.735	121.478	108.333	124.967					6	6.374	9.204	5.017	9.204	9.252	7.8102					6	49055.2	36.07				5	11.1356	3.07592		0,01 µg tamoxifen/g egg + 20 ng EE2/g egg	1	4.65985	4.22856
		7	143.575	165.21	169.241	163.41	130.024	154.292					7	6.264	6.264	8.344	5.433	8.344	6.9298					7	53453.1	39.3038				6	8.36541	0.839233			2	3.67053	2.83845
		8	125.601	132.678	147.255	140.666	140.203	137.281					8	7.383	6.374	5.27	6.468	6.783	6.4556					8	41066.1	30.1957				7	10.4843	1.81157			3	5.12409	3.14762
		9	140.841	124.122	137.057	140.362	158.136	140.104					9	9.176	6.667	9.167	10.009	7.928	8.5894					9	41871.9	30.7881				8	8.35433	1.28495			4	6.00677	3.78383
		10	89.482	137.52	145.452	129.038	165.496	133.398					10	6.68	8.427	8.375	7.917	8.79	8.0378					10	35029.5	25.757				9	11.0506	1.46981			5	6.55153	3.36957
	6	1	128.141	131.318	176.608	160.262	122.171	143.7	153.602			6	1	12.5	11.464	10.138	11.258	9.878	11.0476	9.95502			6	1	33838.7	24.8814	27.5428			10	10.5574	1.69126			6	4.61935	3.37864
		2	127.685	126.106	90.312	100.764	149.898	118.953					2	7.132	6.897	8.498	7.277	8.015	7.5638					2	45408	33.3882				11	8.46156	1.55845			7	4.90787	3.53346
		3	214.017	282.499	210.603	173.245	188.654	213.804					3	7.906	9.501	6.36	9.363	10.035	8.633					3	35799.3	26.323				12	7.98862	1.80874			8	4.83485	3.73074
		4	153.471	160.971	107.964	189.051	65.341	135.36					4	5.667	6.935	7.454	6.36	6.482	6.5796					4	40263.7	29.6057			0,1 µg tamoxifen/g egg + 20 ng EE2/g egg	1	9.68775	2.40116			9	5.37366	4.34756
		5	203.77	237.727	206.352	203.374	186.795	207.604					5	10.035	10.086	13.262	7.096	10.623	10.2204					5	31248.6	22.9769				2	11.2545	1.60134			10	3.06246	2.92631
		6	146.335	209.359	106.125	143.771	61.249	133.368					6	10.417	10.905	12.169	9.718	10.753	10.7924					6	39906.1	29.3427				3	9.46657	1.84568			11	6.09771	3.71349
		7	153.7	96.177	96.817	191.603	203.555	148.37					7	13.235	11.585	10.753	11.211	11.38	11.6328					7	30406.4	22.3577				4	15.6912	2.43873			12	3.76963	3.42906
		8	122.927	135.342	113.984	155.673	126.167	130.819					8	9.939	13.05	13.392	8.004	9.763	10.8296					8	35648.8	26.2123				5	14.1793	1.84382		0,1 µg tamoxifen/g egg + 20 ng EE2/g egg	1	4.03153	3.4275
		9	163.921	160.712	142.022	125.114	101.064	138.567					9	11.219	10.035	10.865	8.995	9.138	10.0504					9	37310.1	27.4339				6	8.15318	1.83053			2	5.05993	3.1166
		10	175.287	130.451	178.281	190.294	153.048	165.472					10	12.836	12.43	12.923	11.696	11.118	12.2006					10	44752.6	32.9063				7	10.1487	1.63563			3	5.7349	3.66374
solvent control	1	1	127.176	154.769	140.48	144.535	195.878	152.568	158.037			7	1	10.937	8.218	11.674	13.024	9.939	10.7584	10.1731			7	1	38971	28.6552	29.5925			8	9.75625	2.00468			4	3.82339	3.24152
		2	160.563	146.043	139.772	154.536	160.332	152.249					2	8.76	11	8.829	7.649	9.252	9.098					2	31269.8	22.9925				9	9.73743	1.72509			5	4.29774	3.42155
		3	150.854	155.264	119.493	127.176	131.226	136.803					3	11.071	8.59	9.807	8.437	9.148	9.4106					3	50572.4	37.1856				10	8.49078	1.96795			6	4.15608	3.63898
		4	179.886	180.603	173.215	192.256	211.445	187.481					4	8.79	10.865	10.172	7.96	9.511	9.4596					4	40337.8	29.6602				11	12.0785	2.54588			7	3.88363	3.10797
		5	153.218	145.538	173.385	210.998	163.469	169.322					5	7.906	8.975	10.905	9.718	11.622	9.8252					5	43155	31.7316				12	10.1316	1.87374		1 µg tamoxifen/g egg + 20 ng EE2/g egg	1	3.40711	3.30083
		6	175.032	178.158	209.432	196.866	148.008	181.499					6	10.833	14.392	8.975	8.7	11.219	10.8238					6	45385.9	33.372				13	9.66709	1.64478			2	3.93868	3.56999
		7	127.176	143.299	144.722	139.675	147.106	140.396					7	11.733	9.4	10.425	9.583	10.841	10.3964					7	30562.7	22.4726			1 µg tamoxifen/g egg + 20 ng EE2/g egg	1	13.6951	2.57046			3	3.84369	3.48952
		8	112.114	143.723	192.621	195.329	199.757	168.709					8	9.446	11.674	11.008	10.623	8.437	10.2376					8	50164.1	36.8853				2	12.8024	1.68679			4	3.74338	3.17512
		9	148.567	138.536	137.032	131.788	199.167	151.018					9	11.733	10.937	14.252	8.995	13.242	11.8318					9	40239.1	29.5875				3	17.6486	2.46959			5	4.17103	3.86979
		10	115.428	132.419	151.174	130.149	172.46	140.326					10	10.009	10.833	10.417	8.437	9.754	9.89					10	31799.8	23.3822				4	12.5626	2.84117			6	4.03316	3.54767
	2	1	157.656	138.929	172.184	138.288	144.253	150.262	125.98			8	1	12.863	12.535	10.623	8.047	12.255	11.2646	10.3613			8	1	43767.9	32.1823	33.4309			5	12.8407	1.51495			7	2.69966	2.59526
		2	191.21	176.511	179.645	145.526	97.272	158.033					2	8.271	11.095	11.441	10.672	9.446	10.185					2	52850.5	38.8607				6	13.2843	2.73825			8	3.20851	2.47174
		3	122.114	174.503	157.003	97.699	108.845	132.033					3	9.176	8.549	7.096	6.834	8.59	8.049					3	54200.2	39.8531				7	14.9189	1.53473			9	2.06797	2.77023
		4	184.996	146.176	142.151	152.154	142.217	153.539					4	8.67	10.865	10.623	11.577	13.044	10.9558					4	41308.7	30.374				8	15.8862	2.35782			10	3.26435	3.09429
		5	104.376	104.25	112.848	106.125	91.761	103.872					5	10.937	10.809	11.211	9.363	10.937	10.6514					5	50603.3	37.2083				9	12.9412	1.86214			11	3.78569	3.73818
		6	125.593	103.313	148.167	79.669	81.347	107.618					6	10.623	7.906	10.146	11.932	10.417	10.2048					6	39415.6	28.9821				10	10.3554	2.0174		10 µg tamoxifen/g egg + 20 ng EE2/g egg	1	3.35556	3.05436
		7	130.746	156.367	129.234	110.846	99.589	125.356					7	11.555	12.507	11.939	11.792	11.008	11.7602					7	48001	35.2949				11	11.7801	1.74584			2	3.27298	2.69922
		8	86.911	91.61	140.062	116.741	69.572	100.979					8	9.317	10.961	9.1	8.79	9.4	9.5136					8	31643.4	23.2672			10 µg tamoxifen/g egg + 20 ng EE2/g egg	1	8.94218	2.86672			3	4.37895	3.51116
		9	107.658	101.462	106.855	88.839	130.538	107.07					9	11.219	11.792	9.148	8.79	12.754	10.7406					9	46361.6	34.0894				2	10.8041	2.21832			4	4.77194	3.51286
		10	152.618	128.544	131.345	117.527	75.176	121.042					10	13.017	9.718	8.67	11.196	8.839	10.288					10	46508.2	34.1972				3	6.59957	1.59042			5	3.44259	2.95181
	3	1	178.672	180.148	88.944	170.018	134.673	150.491	170.818			9	1	7.419	6.009	6.719	7.096	7.862	7.021	8.23874			9	1	40802.9	30.0022	28.6981			4	6.46438	1.84206			6	3.41263	2.69587
		2	198.573	188.948	189.812	163.953	146.261	177.509					2	7.546	7.083	8.344	8.76	6.667	7.68					2	42567	31.2993				5	7.06968	1.41924			7	3.97609	3.1962
		3	142.19	196.937	194.269	159.483	137.308	166.037					3	6.25	6.719	7.096	8.015	7.546	7.1252					3	41560.8	30.5594				6	4.01048	1.48305			8	3.41025	2.79335
		4	215.964	176.661	115.413	163.802	177.678	169.904					4	5.48	7.96	7.546	9.727	8.333	7.8092					4	40106.2	29.4899				7	8.0496	1.7938			9	2.21364	1.95925
		5	178.064	98.714	147.904	172.653	310.462	181.559					5	6.719	7.546	7.193	10.45	7.603	7.9022					5	37092.4	27.2738				8	5.91887	1.29417			10	2.31417	2.21059
		6	243.072	160.529	187.618	215.24	192.204	199.733					6	9.176	8.344	7.546	6.25	8.333	7.9298					6	32321.5	23.7658				9	5.99926	1.34927			11	3.29662	3.21594
		7	156.083	163.342	197.641	164.524	135.041	163.326					7	8.427	8.344	9.4	8.907	7.928	8.6012					7	36262.7	26.6637									12	2.17274	2.09191
		8	139.289	127.129	128.865	182.407	237.079	162.954					8	10.809	12.5	10.078	11.258	9.763	10.8816					8	34793.8	25.5836									13	2.75275	2.5525
		9	166.7	178.812	157.165	162.029	143.343	161.61					9	8.09	9.511	9.727	11.494	8.58	9.4804					9	39857.8	29.3072
		10	183.865	179.283	184.949	131.281	195.897	175.055					10	7.193	7.512	8.79	7.862	8.427	7.9568					10	44928.8	33.0359
	4	1	138.757	135.506	133.437	166.143	206.047	155.978	161.777			10	1	10.291	9.52	5.27	8.946	12.148	9.235	9.7647			10	1	44765.6	32.9159	27.7171
		2	160.349	194.365	208.308	185.676	212.515	192.243					2	11.18	11.555	12.535	12.693	14.731	12.5388					2	32687.7	24.0351
		3	151.804	148.791	149.838	124.814	194.254	153.9					3	11.38	6.346	7.66	7.906	7.512	8.1608					3	38627.4	28.4025
		4	149.09	132.615	126.724	140.002	220.128	153.712					4	8.218	7.862	7.12	9.223	6.152	7.715					4	48552.4	35.7003
		5	116.264	146.669	134.19	132.615	164.22	138.792					5	8.385	8.015	6.346	8.7	8.047	7.8986					5	35413.4	26.0392
		6	188.4	165.008	165.019	222.6	200.916	188.389					6	9.619	10.491	11.219	9.904	10.833	10.4132					6	28521.7	20.9718
		7	145.022	198.349	155.02	135.856	166.669	160.183					7	11.095	10.937	12.019	10.078	8.437	10.5132					7	40918.7	30.0873
		8	162.502	161.744	159.48	179.546	178.963	168.447					8	10.937	11.071	12.339	13.463	14.349	12.4318					8	40836.6	30.0269
		9	169.218	152.536	146.69	134.208	165.967	153.724					9	11.524	9.904	8.344	7.512	12.923	10.0414					9	30919.4	22.7349
		10	148.354	148.354	150.009	165.886	149.399	152.4					10	8.946	8.207	7.906	9.52	8.917	8.6992					10	35709.7	26.2572
	5	1	128.433	107.961	163.531	127.009	148.258	135.038	152.415		solvent control	1	1	12.652	9.252	5.803	5.27	5.336	7.6626	8.38244		solvent control	1	1	59756.8	43.9388	35.2844
		2	172.599	145.06	121.246	116.964	189.315	149.037					2	11.071	10.833	9.363	10.541	8.207	10.003					2	44360.9	32.6183
		3	149.539	128.401	155.842	145.117	164.169	148.614					3	9.619	7.928	6.305	5.59	5.966	7.0816					3	57452.8	42.2447
		4	152.491	163.639	210.939	165.034	165.852	171.591					4	6.783	8.427	10.549	7.546	7.96	8.253					4	43574.5	32.0401
		5	185.48	171.669	212.5	169.906	168.069	181.525					5	7.5	7.683	9.904	9.176	7.083	8.2692					5	54885.9	40.3573
		6	145.664	148.242	165.473	128.466	176.967	152.962					6	8.186	9.878	9.363	7.12	7.083	8.326					6	45463.5	33.4291
		7	123.167	136.486	137.449	160.002	165.884	144.598					7	8.333	8.76	10.078	9.317	11.071	9.5118					7	41508	30.5206
		8	138.506	146.885	166.963	147.091	167.159	153.321					8	9.904	10.491	9.501	8.437	8.302	9.327					8	42708.7	31.4034
		9	136.04	163.802	157.872	152.08	148.251	151.609					9	5.893	5.848	6.667	8.79	7.683	6.9762					9	51147.1	37.6081
		10	140.112	109.119	141.532	130.141	158.379	135.857					10	8.995	8.09	7.683	7.683	9.619	8.414					10	39009.9	28.6837
	6	1	160.522	158.465	146.159	168.385	207.478	168.202	141.734			2	1	11.38	12.836	12.112	12.112	11.763	12.0406	11.1334			2	1	36548.6	26.874	26.8554
		2	115.332	162.331	163.953	190.791	185.144	163.51					2	9.904	11.622	8.427	13.463	13.851	11.4534					2	40403.5	29.7084
		3	152.375	114.252	96.267	97.025	101.79	112.342					3	9.878	11.18	9.878	11.258	10.833	10.6054					3	38939.2	28.6318
		4	106.23	202.498	135.831	144.513	113.103	140.435					4	9.904	11.008	13.756	14.464	13.262	12.4788					4	45008.7	33.0946
		5	191.319	153.048	114.616	111.517	104.3	134.96					5	7.372	8.437	9.363	9.939	9.1	8.8422					5	30501	22.4272
		6	136.872	162.807	167.533	173.496	173.672	162.876					6	10.549	11.733	9.176	11.622	7.683	10.1526					6	25695.3	18.8936
		7	106.474	125.225	150.591	155.322	159.535	139.429					7	10.833	11.38	11.118	9.176	9.363	10.374					7	39792	29.2588
		8	123.223	168.5	171.675	174.185	167.633	161.043					8	13.242	13.572	11.335	13.851	13.553	13.1106					8	38347.6	28.1967
		9	123.316	157.277	130.131	142.502	114.215	133.488					9	11.441	11.219	12.836	11.008	8.207	10.9422					9	37529	27.5948
		10	92.594	115.003	106.667	95.848	95.179	101.058					10	12.964	10.623	9.148	11.939	11.997	11.3342					10	32468.1	23.8736
	7	1	132.594	134.539	149.334	140.757	227.341	156.913	148.273			3	1	16.92	19.085	17.25	9.501	12.7	15.0912	10.5117			3	1	28646.4	21.0635	25.5085
		2	164.574	197.012	171.156	125.966	160.472	163.836					2	8.385	7.75	8.995	8.302	9.317	8.5498					2	24232.6	17.8181
		3	118.521	152.254	137.853	139.406	110.711	131.749					3	12.923	13.34	11.622	11.464	12.198	12.3094					3	33297.7	24.4836
		4	148.67	114.361	137.032	134.735	134.164	133.792					4	13.017	10.017	9.138	9.939	10.937	10.6096					4	39333.3	28.9216
		5	103.605	121.866	148.703	116.515	122.749	122.688					5	14.173	13.235	17.285	9.176	11.008	12.9754					5	37379.3	27.4848
		6	138.907	149.52	152.7	162.113	143.993	149.447					6	9.727	11.335	11.585	11.441	10.905	10.9986					6	36150	26.5809
		7	135.874	163.709	160.704	164.524	144.205	153.803					7	10	10.009	8.829	10.009	8.333	9.436					7	42504	31.2529
		8	157.568	160.704	162.899	159.591	161.245	160.401					8	11.555	7.096	9.148	9.52	8.58	9.1798					8	33244.4	24.4444
		9	143.771	136.781	141.512	159.182	175.519	151.353					9	8.427	8.907	6.509	9.834	7.75	8.2854					9	34227.3	25.1671
		10	146.097	159.513	156.216	172.782	159.149	158.751					10	6.834	5.433	7.862	8.917	9.363	7.6818					10	37899.8	27.8675
	8	1	196.73	188.379	180.008	167.668	159.278	178.413	173.833			4	1	11.524	11	8.59	7.649	7.419	9.2364	9.14308			4	1	43545.8	32.019	35.7295
		2	152.154	171.83	134.487	180.758	185.706	164.987					2	9.317	7.66	7.96	7.96	9.878	8.555					2	45019.3	33.1024
		3	169.448	211.544	215.872	198.396	203.974	199.847					3	7.96	7.649	8.004	6.194	7.512	7.4638					3	45145.7	33.1953
		4	209.367	233.071	236.011	212.031	183.419	214.78					4	6.588	11.008	7.862	10.961	12.944	9.8726					4	60046.2	44.1516
		5	188.976	181.907	135.495	208.535	208.01	184.585					5	12.304	13.262	12.944	14.577	12.304	13.0782					5	54351	39.964
		6	176.354	164.186	145.798	166.208	157.379	161.985					6	8.67	8.7	9.252	8.59	8.59	8.7604					6	53248.3	39.1531
		7	129.701	130.437	142.692	154.673	131.912	137.883					7	10.308	11	6.374	6.783	8.437	8.5804					7	45993.6	33.8188
		8	135.575	175.008	157.074	145.757	137.369	150.157					8	11.258	6.264	5.417	5.069	6.305	6.8626					8	38239.6	28.1173
		9	169.169	134.81	187.441	148.924	189.696	166.008					9	9.317	9.904	7.828	10.45	8.829	9.2656					9	52869.6	38.8747
		10	187.092	202.569	165.817	205.349	137.624	179.69					10	11.258	9.252	9.592	9.176	9.501	9.7558					10	47462.5	34.8989
	9	1	154.065	133.357	134.673	121.678	115.941	131.943	118.836			5	1	11.441	8.59	6.731	7.454	10.291	8.9014	9.15222			5	1	46533.7	34.2159	31.1234
		2	129.893	87.991	142.022	126.428	170.803	131.427					2	8.015	7.862	8.829	13.156	10.45	9.6624					2	40113.7	29.4954
		3	113.74	87.214	140.211	124.88	166.009	126.411					3	7.083	6.719	8.427	7.5	7.512	7.4482					3	39498.3	29.0428
		4	112.278	142.517	150.854	147.434	126.998	136.016					4	10.817	11.335	9.583	9.317	11.118	10.434					4	43480.6	31.971
		5	94.281	92.38	118.849	123.333	95.804	104.929					5	6.897	5.154	4.35	7.512	6.25	6.0326					5	41043.2	30.1788
		6	105.951	108.682	128.604	111.754	96.097	110.218					6	11.441	11.696	10.865	10.833	17.564	12.4798					6	41473.1	30.4949
		7	121.478	120.833	98.83	95.106	92.079	105.665					7	4.877	6.588	7.383	9.1	10.45	7.6796					7	39408.9	28.9771
		8	112.512	127.503	116.264	111.583	85.44	110.66					8	6.719	7.5	8.186	9.754	10.45	8.5218					8	46858	34.4544
		9	137.245	133.065	124.903	92.845	100.792	117.77					9	5.017	7.512	9.317	12.535	6.25	8.1262					9	39402.9	28.9728
		10	107.523	131.511	124.454	109.357	93.756	113.32					10	12.486	14.167	13.242	12.148	9.138	12.2362					10	45465.6	33.4306
	10	1	172.345	151.804	117.574	85.004	136.667	132.679	142.489			6	1	5.893	8.59	8.344	5.559	7.096	7.0964	9.12291			6	1	51724.1	38.0325	31.2683
		2	128.358	105.106	109.56	87.122	269.574	139.944					2	9.583	12.611	10.905	10.45	10.68	10.8458					2	47562	34.972
		3	114.943	91.142	110.883	130.522	151.577	119.813					3	9.4	8.76	10	10.035	9.176	9.4742					3	47260.4	34.7503
		4	223.782	220.663	181.797	112.67	86.991	165.181					4	10.035	9.583	7.512	9.754	7.383	8.8534					4	40899.8	30.0734
		5	234.457	212.459	152.9	126.417	112.355	167.718					5	8.427	10.45	10.417	9.167	7.649	9.222					5	44726	32.8868
		6	126.998	83.104	154.978	139.525	94.535	119.828					6	7.784	6.68	6.783	9.252	7.683	7.6364					6	41019.4	30.1614
		7	244.569	212.5	177.908	135.659	119.713	178.07					7	8.375	7.277	7.383	9.1	10.215	8.47					7	46427.1	34.1376
		8	134.972	133.547	79.848	146.811	65.155	112.067					8	9.204	7.917	10.138	10	10	9.4518					8	33294.8	24.4815
		9	187.335	161.525	117.804	113.667	95.804	135.227					9	8.76	10.009	10.841	11.696	13.975	11.0562					9	36049.5	26.507
		10	211.261	175.075	127.028	124.304	134.177	154.369					10	-	-	-	-	-	-					10	36285.8	26.6807
	11	1	154.223	153.206	125.786	128.195	93.679	131.018	131.621			7	1	14.583	9.252	13.907	9.501	15.422	12.533	8.46516			7	1	40867.2	30.0494	28.557
		2	164.067	153.206	156.924	141.247	126.343	148.357					2	10.316	9.691	11.792	11.441	9.727	10.5934					2	41199.5	30.2937
		3	131.859	120.488	84.039	132.772	129.722	119.776					3	5.922	8.333	8.271	7.66	9.727	7.9826					3	45385.6	33.3718
		4	127.829	144.722	152.053	115.905	124.122	132.926					4	10.086	9.501	9.176	9.014	9.363	9.428					4	39690.8	29.1844
		5	128.981	111.046	106.592	120.393	94.766	112.356					5	8.858	8.59	7.071	6.897	7.66	7.8152					5	40333.5	29.657
		6	225.47	144.01	144.744	158.902	187.707	172.167					6	6.194	6.36	6.36	4.859	7.083	6.1712					6	31598.6	23.2343
		7	171.118	133.941	130.069	178.625	136.486	150.048					7	9.138	8.427	7.906	8.015	8.79	8.4552					7	38777.6	28.5129
		8	111.418	109.874	93.59	90.711	117.63	104.645					8	5.789	7.12	7.75	9.176	5.667	7.1004					8	38488.5	28.3004
		9	94.553	101.742	104.659	119.4	107.037	105.478					9	6.834	6.36	5.667	5.606	6.36	6.1654					9	35221.2	25.8979
		10	155.11	121.178	143.636	166.519	110.771	139.443					10	7.683	9.511	6.731	8.207	9.904	8.4072					10	36813.2	27.0685
20 ng EE2/g egg	1	1	109.586	81.125	113.633	109.195	120.231	106.754	128.584		20 ng EE2/g egg	1	1	65.533	67.532	65.418	72.768	124.807	79.2116	67.3162		20 ng EE2/g egg	1	1	18334.9	13.4815	17.1275
		2	145.643	119.49	154.868	123.336	121.341	132.936					2	125.444	79.019	96.833	70.194	106.315	95.561					2	25502.6	18.7519
		3	107.565	172.79	153.56	146.128	105.843	137.177					3	148.976	111.103	120.564	142.963	91.687	123.059					3	15072.6	11.0828
		4	167.672	168.17	155.925	178.101	190.462	172.066					4	128.917	141.452	136.066	121.314	109.723	127.494					4	23367.2	17.1818
		5	90.096	132.594	149.25	117.857	156.636	129.287					5	8.839	8.427	7.683	8.015	6.872	7.9672					5	20601.6	15.1482
		6	136.974	147.897	108.538	119.17	190.981	140.712					6	6.872	5	7.917	6.264	6.25	6.4606					6	26126.9	19.211
		7	132.34	134.177	130.155	124.125	131.627	130.485					7	7.917	10.035	10.215	13.775	13.024	10.9932					7	29601.9	21.7661
		8	113.346	118.327	134.26	113.192	122.602	120.345					8	125.201	122.962	136.342	133.443	101.253	123.84					8	27902.4	20.5165
		9	110.846	106.748	97.504	105.03	125.8	109.186					9	102.521	88.337	48.894	90.601	99.45	85.9606					9	25837.7	18.9983
		10	124.839	101.544	122.82	72.005	113.275	106.897					10	13.156	15.833	11.032	12.43	10.623	12.6148					10	20586.8	15.1374
	2	1	121.301	141.375	153.661	184.067	83.57	136.795	136.162			2	1	157.925	105.874	117.518	136.342	146.667	132.865	141.27			2	1	4689.06	3.44784	3.91097
		2	123.345	132.503	156.722	153.136	196.69	152.479					2	126.722	118.838	138.343	125.419	136.251	129.115					2	688.889	0.506536
		3	82.773	79.848	113.801	83.521	67.864	85.5614					3	169.136	164.777	219.096	176.499	165.114	178.924					3	2463.89	1.81168
		4	167.517	131.977	180.501	166.237	285.251	186.297					4	105.483	108.337	99.584	96.699	114.611	104.943					4	9951.22	7.31707
		5	131.574	146.026	178.672	146.335	126.768	145.875					5	163.359	206.682	230.085	197.516	190.879	197.704					5	1057.29	0.777421
		6	99.903	101.379	100.64	101.002	61.124	92.8096					6	154.439	136.265	149.314	89.746	126.337	131.22					6	9769.97	7.1838
		7	80.147	91.788	86.205	99.562	97.183	90.977					7	118.815	160.167	125.453	146.858	178.613	145.981					7	11525.5	8.47465
		8	164.496	144.35	156.64	207.266	292.993	193.149					8	161.444	186.401	190.183	171.263	147.954	171.449					8	6721.01	4.94192
		9	151.22	129.797	141.375	136.262	118.898	135.51					9	98.072	83.858	80.762	84.805	91.807	87.8608					9	2773.09	2.03904
		10	85.736	148.971	164.033	168.16	143.914	142.163					10	155.503	146.207	117.67	127.419	116.384	132.637					10	3549.31	2.60978
	3	1	134.629	130.267	119.968	144.801	149.789	135.891	139.978			3	1	9.904	8.58	7.289	9.511	7.5	8.5568	16.9181			3	1	35645.1	26.2097	24.7068
		2	180.279	192.256	148.108	144.722	147.559	162.585					2	33.876	68.354	67.269	63.762	58.253	58.3028					2	30162	22.1779
		3	143.336	133.648	145.328	150.614	154.816	145.548					3	11.032	14.637	10.009	13.024	14.191	12.5786					3	35193.4	25.8775
		4	85.493	111.844	134.084	143.723	168.988	128.826					4	7.096	7.603	7.277	6.374	6.588	6.9876					4	36178.1	26.6016
		5	190.899	149.169	143.394	173.385	165.773	164.524					5	16.029	13.392	5.069	9.665	10.035	10.838					5	32859.5	24.1614
		6	138.869	141.249	139.144	166.02	161.075	149.271					6	6.374	5.848	9.167	7.546	8.344	7.4558					6	31526.9	23.1816
		7	188.762	150.711	175.367	164.979	163.233	168.61					7	13.744	11.674	7.083	8.907	9.665	10.2146					7	36507.5	26.8437
		8	131.112	128.133	134.81	150.356	126.735	134.229					8	24.906	38.875	42.184	47.619	17.584	34.2336					8	33690.8	24.7726
		9	114.516	41.742	67.521	60.599	76.34	72.1436					9	14.24	8.995	12.134	9.592	10.865	11.1652					9	30609.7	22.5071
		10	121.769	137.523	138.356	144.253	148.859	138.152					10	11.258	7.096	9.52	7.928	8.437	8.8478					10	33639.1	24.7346
	4	1	156.899	144.772	175.317	191.848	159.018	165.571	145.439			4	1	10.623	9.148	7.512	8.047	6.719	8.4098	50.1027			4	1	30684.5	22.5622	25.8398
		2	136.903	131.659	227.26	155.459	199.313	170.119					2	17.331	27.019	30.098	20.737	5.848	20.2066					2	28122.9	20.6786
		3	180.881	144.407	105.013	154.065	200.009	156.875					3	181.358	200.844	106.667	77.504	29.17	119.109					3	30661.6	22.5453
		4	185.008	96.011	115.012	104.33	110.617	122.196					4	18.028	18.376	16.029	14.222	6.897	14.7104					4	37078.6	27.2637
		5	148.333	207.667	74.545	111.844	99.338	128.345					5	28.373	14.731	7.75	6.588	13.926	14.2736					5	39570.7	29.0961
		6	191.19	104.38	147.904	209.845	196.365	169.937					6	227.817	231.412	202.369	105.211	45.901	162.542					6	36283.9	26.6793
		7	87.817	60.006	85.509	104.433	85.967	84.7464					7	75.042	83.552	14.907	11	12.597	39.4196					7	33325	24.5037
		8	147.314	156.636	174.366	158.368	207.527	168.842					8	51.803	58.339	51.561	29.829	21.51	42.6084					8	44688.9	32.8595
		9	118.512	131.725	125.369	91.443	82.074	109.825					9	76.763	53.4	13.851	72.984	7.603	44.9202					9	34792.2	25.5825
		10	148.782	185.21	172.405	181.433	201.859	177.938					10	27.083	59.378	62.984	13.359	11.335	34.8278					10	36213.5	26.6276
	5	1	78.868	108.346	68.582	133.375	120.104	101.855	114.368			5	1	9.904	9.904	10.623	10.865	11.071	10.4734	8.71296			5	1	44784.9	32.9301	26.6662
		2	170.249	252.72	80.321	72.116	115.545	138.19					2	9.501	7.071	7.096	12.507	7.784	8.7918					2	38209.7	28.0954
		3	167.955	94.104	99.251	99.359	157.131	123.56					3	6.935	8.427	8.498	9.665	8.7	8.445					3	41033.3	30.1716
		4	156.049	105.676	137.762	90.711	89.12	115.864					4	9.363	9.317	9.718	8.946	8.437	9.1562					4	38562.2	28.3545
		5	94.17	99.223	133.398	111.679	90.015	105.697					5	9.148	4.583	4.658	3.436	4.167	5.1984					5	35908.7	26.4034
		6	113.911	96.645	81.104	106.933	91.382	97.995					6	4.167	11.008	9.167	9.592	8.839	8.5546					6	33160.8	24.3829
		7	78.537	109.434	137.664	127.546	118.702	114.377					7	11.696	9.619	10.45	6.588	5.833	8.8372					7	34737.7	25.5424
		8	108.874	148.67	141.916	136.407	115.77	130.327					8	9.592	11.373	11.524	10.712	11.38	10.9162					8	43074.1	31.6722
		9	109.978	106.888	86.313	120.833	125.549	109.912					9	6.264	8.186	6.783	6.25	5	6.4966					9	25664.9	18.8713
		10	111.716	109.281	136.758	110.05	61.689	105.899					10	10.215	10.45	10.68	10.078	9.878	10.2602					10	27524	20.2382
	6	1	125.18	134.663	138.897	113.437	150.868	132.609	116.042			6	1	107.926	87.314	77.061	96.861	84.198	90.672	89.2885			6	1	16327.4	12.0055	14.139
		2	132.668	139.149	141.512	105.442	161.4	136.034					2	73.305	101.099	101.418	124.302	116.93	103.411					2	14759.2	10.8524
		3	150.171	117.901	96.742	153.118	205.955	144.777					3	119.508	118.702	106.413	107.913	127.913	116.09					3	14996.4	11.0267
		4	164.979	143.358	123.968	118.585	181.707	146.519					4	69.318	55.709	71.968	76.077	74.588	69.532					4	22489.9	16.5367
		5	72.044	55.84	48.677	46.203	54.083	55.3694					5	95.5	105.72	119.932	138.159	148.325	121.527					5	24155.2	17.7612
		6	145.957	124.387	128.609	125.438	122.293	129.337					6	115.309	123.705	85.934	120.941	143.039	117.786					6	18503.1	13.6052
		7	100.028	88.274	159.605	131.424	157.094	127.285					7	71.837	53.781	65.219	75.197	61.717	65.5502					7	18656.2	13.7178
		8	157.165	96.444	113.728	110.996	114.807	118.628					8	105.492	119.658	148.849	162.553	120.026	131.316					8	19505.9	14.3426
		9	51.915	58.766	57.47	63.879	83.321	63.0702					9	19.53	15.287	16.997	14.655	17.815	16.8568					9	16125.7	11.8571
		10	114.552	106.93	83.749	101.177	127.544	106.79					10	57.765	37.065	62.373	61.017	82.504	60.1448					10	26771.7	19.6851
	7	1	162.509	211.386	192.805	145.328	128.722	168.15	140.747			7	1	94.535	115.434	91.852	81.905	88.526	94.4504	96.0709			7	1	14426.2	10.6075	14.5818
		2	80.039	86.863	87.242	87.341	62.506	80.7982					2	59.219	61.707	32.766	59.227	43.724	51.3286					2	20648.6	15.1828
		3	75.875	155.914	138.694	125.734	248.677	148.979					3	137.818	106.119	152.399	129.135	123.157	129.726					3	28853	21.2154
		4	99.198	110.202	230.839	173.333	129.167	148.548					4	95.802	100.316	105.278	93.197	89.781	96.8748					4	31647.6	23.2703
		5	124.438	103.498	230.014	184.214	113.346	151.102					5	113.359	89.592	79.588	80.001	81.668	88.8416					5	20166.8	14.8286
		6	67.521	84.035	117.334	97.3	78.546	88.9472					6	92.625	78.775	92.718	109.288	148.101	104.301					6	17274.1	12.7016
		7	170.815	190	145.344	173.383	197.296	175.368					7	65.005	120.995	97.7	87.212	93.129	92.8082					7	17626.2	12.9605
		8	130.035	193.637	188.845	101.885	85.934	140.067					8	79.413	111.891	83.953	92.766	107.561	95.1168					8	13453.3	9.89213
		9	169.722	120.185	101.721	103.404	234.35	145.876					9	100.458	103.703	96.491	104.272	122.489	105.483					9	15705.4	11.5481
		10	138.857	183.322	122.284	111.993	241.726	159.636					10	135.041	138.007	87.092	79.171	69.585	101.779					10	18511.5	13.6114
	8	1	117.527	114.276	95.234	86.237	123.965	107.448	106.671			8	1	146.271	115.87	78.883	119.014	137.063	119.42	69.5587			8	1	15258.9	11.2197	16.124
		2	82.886	67.546	87.242	118.345	100.919	91.3876					2	157.507	159.953	172.977	104.607	80.213	135.051					2	25663.4	18.8701
		3	101.796	107.125	78.617	90.925	94.122	94.517					3	9.148	10.291	11	8.218	9.317	9.5948					3	20584	15.1353
		4	104.433	116.324	116.324	107.134	87.643	106.372					4	7.683	8.917	6.719	8.437	7.649	7.881					4	25329.9	18.6249
		5	65.431	88.475	119.193	108.362	113.336	98.9594					5	176.716	116.812	118.208	89.863	81.595	116.639					5	20479.3	15.0583
		6	107.293	64.577	120.465	102.212	109.889	100.887					6	11.258	6.667	7.132	6.067	8.09	7.8428					6	22036.3	16.2032
		7	119.504	113.853	104.127	86.783	79.796	100.813					7	140.587	118.466	106.234	205.135	219.974	158.079					7	27994.3	20.584
		8	102.622	108.131	119.658	141.912	139.289	122.322					8	133.245	127.018	92.392	120.304	133.498	121.291					8	23292.2	17.1266
		9	120.83	120.914	130.149	142.366	131.985	129.249					9	9.252	8.437	9.904	11.18	8.995	9.5536					9	12960.8	9.52997
		10	97.243	119.4	117.763	123.797	115.596	114.76					10	10.672	11	10.516	10.647	8.333	10.2336					10	25687.8	18.8881
	9	1	103.739	96.957	120.698	163.607	197.667	136.534	138.336			9	1	118.593	101.092	95.058	95.091	81.671	98.301	102.347			9	1	17736.5	13.0415	13.5655
		2	120.306	146.546	201.942	189.216	164.707	164.543					2	130.56	108.469	123.835	126.373	127.102	123.268					2	19762.7	14.5314
		3	121.392	104.31	113.094	116.204	104.646	111.929					3	130.461	138.145	135.955	108.074	119.63	126.453					3	18429.9	13.5514
		4	165.254	153.478	142.373	118.371	155.081	146.911					4	112.793	117.439	121.109	137.237	113.02	120.32					4	14022.4	10.3106
		5	176.881	163.811	158.487	166.04	161.125	165.269					5	114.735	141.503	131.14	131.39	99.181	123.59					5	25911.8	19.0528
		6	136.311	129.939	122.82	113.437	161.574	132.816					6	80.418	61.068	64.722	80.144	72.87	71.8444					6	15150.2	11.1398
		7	124.928	120.971	126.23	114.018	155.459	128.321					7	88.629	66.616	75.237	72.276	70.658	74.6832					7	17464.2	12.8413
		8	123.898	110.028	112.931	134.487	149.006	126.07					8	81.164	75.242	75.984	84.46	76.714	78.7128					8	13678.1	10.0574
		9	115.677	94.535	121.769	131.677	165.758	125.883					9	109.754	89.273	89.266	86.692	88.891	92.7752					9	16647	12.2405
		10	139.692	177.461	137.437	127.642	143.183	145.083					10	113.769	112.018	107.785	115.482	118.545	113.52					10	25687.9	18.8881
	10	1	187.591	125.011	113.346	157.449	126.801	142.04	155.653			10	1	5.848	5.48	6.667	5.667	6.872	6.1068	17.6246			10	1	26595.5	19.5555	22.545
		2	147.914	102.341	113.92	112.799	122.803	119.955					2	12.255	5.833	8.302	14.655	8.76	9.961					2	25849.3	19.0068
		3	132.992	128.782	140.695	137.042	138.967	135.696					3	8.917	8.437	8.427	10.078	7.784	8.7286					3	34363.4	25.2672
		4	150.224	162.115	159.088	124.393	132.9	145.744					4	5.417	5.559	3.953	8.995	5.966	5.978					4	32387.2	23.8141
		5	214.272	217.268	208.343	197.554	169.247	201.337					5	8.186	8.186	5.803	3.727	5	6.1804					5	27903.5	20.5173
		6	206.727	170.884	181.255	191.364	202.334	190.513					6	7.383	7.928	8.995	8.25	9.252	8.3616					6	26479.5	19.4702
		7	209.273	153.806	154.5	124.178	129.684	154.288					7	8.047	6.346	5.417	5.48	6.264	6.3108					7	37487.2	27.5641
		8	-	-	-	-	-	-					8	65.021	75.005	9.252	7.5	11.441	33.6438					8	37943.6	27.8997
		9	-	-	-	-	-	-					9	7.512	7.289	8.09	89.757	99.847	42.499					9	32313.7	23.7601
		10	-	-	-	-	-	-					10	55.481	61.206	63.908	37.917	23.867	48.4758					10	25289.2	18.595
	11	1	146.299	69.292	103.071	113.728	143.122	115.102	127.832			11	1	128.191	105.43	75.499	69.142	69.967	89.6458	84.9571			11	1	16580.4	12.1915	16.1507
		2	110.05	109.218	130.833	144.205	105.33	119.927					2	140.883	182.518	126.101	156.749	167.286	154.707					2	14869.1	10.9332
		3	86.039	111.212	129.274	103.347	146.669	115.308					3	100.847	114.413	140.59	92.701	79.775	105.665					3	22576.9	16.6007
		4	103.417	125.833	134.177	144.458	118.345	125.246					4	69.967	79.417	74.424	54.55	58.149	67.3014					4	20636.5	15.1739
		5	119.309	85.898	145.855	141.689	147.785	128.107					5	38.327	92.275	64.399	41.443	43.989	56.0866					5	25007.3	18.3877
		6	89.357	147.839	149.25	117.512	130.011	126.794					6	71.19	50.732	71.555	66.255	56.719	63.2902					6	15953.6	11.7306
		7	81.938	144.513	151.497	116.964	125.178	124.018					7	68.074	76.609	60.244	9.363	6.152	44.0884					7	31455.2	23.1288
		8	106.667	145.836	163.41	120.836	142.588	135.867					8	79.54	87.464	76.127	65.443	78.114	77.3376					8	27825.9	20.4602
		9	140.089	169.241	133.357	149.188	128.552	144.085					9	67.711	134.015	108.687	85.172	74.881	94.0932					9	29825.7	21.9307
		10	155.494	138.268	149.164	134.858	141.549	143.867					10	82.277	121.041	69.863	106.875	106.72	97.3552					10	14918.4	10.9694
0,001 µg tamoxifen/g egg + 20 ng EE2/g egg	1	1	144.285	127.816	139.087	109.75	144.722	133.132	146.26		0,001 µg tamoxifen/g egg + 20 ng EE2/g egg	1	1	9.904	12.112	9.904	12.693	9.754	10.8734	37.5447		0,001 µg tamoxifen/g egg + 20 ng EE2/g egg	1	1	48449.1	35.6244	28.863
		2	116.598	125.877	130.024	140.159	90.65	120.662					2	11.674	8.76	6.667	8.344	6.374	8.3638					2	36152.1	26.5824
		3	177.649	137.914	123.864	124.814	137.338	140.316					3	9.252	9.176	10.417	8.344	9.176	9.273					3	42170.3	31.0076
		4	169.808	182.986	165.431	148.27	175.659	168.431					4	7.906	7.96	5.48	11.733	13.775	9.3708					4	43324.7	31.8564
		5	146.026	102.774	116.219	134.001	114.903	122.785					5	8.907	8.498	9.252	13.392	10.491	10.108					5	34055.2	25.0406
		6	137.624	121.977	105.768	128.171	136.486	126.005					6	8.79	9.167	11.25	9.619	10.425	9.8502					6	45596.5	33.5269
		7	133.169	142.146	154.187	157.165	131.891	143.712					7	54.661	56.742	63.799	42.135	30.971	49.6616					7	37478.8	27.558
		8	141.669	169.076	164.338	164.243	152.502	158.366					8	50.589	44.632	145.426	91.265	60.001	78.3826					8	34150	25.1103
		9	165.557	160.028	153.236	195.256	170.852	168.986					9	48.103	51.749	51.535	47.085	151.503	69.995					9	31133.9	22.8925
		10	176.708	162.703	185.317	195.92	180.378	180.205					10	137.993	144.874	125.018	88.868	101.092	119.569					10	40025.7	29.4307
	2	1	128.282	133.427	145	155.193	123.054	136.991	134.671			2	1	11.441	8.995	10.961	10.417	10.817	10.5262	8.02178			2	1	38456.1	28.2765	26.1622
		2	126.241	110.786	106.696	113.633	124.638	116.399					2	9.252	6.783	7.193	9.252	7.928	8.0816					2	33842	24.8838
		3	122.91	116.696	97.824	131.416	122.296	118.228					3	10	9.4	9.501	8.75	7.12	8.9542					3	33422.7	24.5755
		4	128.714	112.673	150.354	143.035	133.359	133.627					4	7.512	7.96	6.305	6.667	6.667	7.0222					4	40029.9	29.4337
		5	132.353	109.246	113.59	132.298	160.548	129.607					5	8.015	9.727	8.75	6.588	7.917	8.1994					5	36583.2	26.8994
		6	131.003	189.18	140.243	157.852	151.845	154.025					6	8.09	7.383	7.383	5.667	6.719	7.0484					6	30016.5	22.0709
		7	98.036	115.878	106.569	64.253	87.496	94.4464					7	7.96	6.588	7.546	7.512	6.68	7.2572					7	31167.9	22.9176
		8	170.833	168.081	142.022	130.886	159.079	154.18					8	8.829	7.383	7.132	7.193	7.917	7.6908					8	32947.9	24.2264
		9	153.091	158.465	159.865	146.211	134.562	150.439					9	7.546	6.719	6.68	6.719	7.277	6.9882					9	34078.5	25.0577
		10	171.796	161.866	164.186	151.735	144.234	158.763					10	8.344	8.75	9.176	8.375	7.603	8.4496					10	45261.8	33.2807
	3	1	178.701	150.13	161.075	136.667	162.918	157.898	127.253			3	1	7.193	7.383	7.096	7.96	6.731	7.2726	7.59526			3	1	23392.2	17.2001	25.2874
		2	139.107	120.569	117.023	78.692	112.577	113.594					2	8.09	7.083	6.468	8.975	9.252	7.9736					2	38131.8	28.0381
		3	92.018	108.746	93.579	87.599	75.213	91.431					3	9.223	7.083	6.509	6.346	6.588	7.1498					3	26631.9	19.5823
		4	147.521	125.679	168.896	98.886	126.01	133.398					4	7.132	8.333	7.603	9.4	7.096	7.9128					4	38680.7	28.4417
		5	152.023	154.814	109.246	122.842	127.652	133.315					5	8.015	7.169	6.68	6.194	7.289	7.0694					5	50180	36.8971
		6	148.467	163.576	114.64	117.005	102.334	129.204					6	8.79	6.667	9.317	9.52	8.437	8.5462					6	30704.2	22.5766
		7	169.419	114.701	92.38	112.478	90.864	115.968					7	7.083	7.784	6.194	7.5	6.374	6.987					7	37861.5	27.8393
		8	176.183	138.268	127.009	118.828	106.23	133.304					8	4.583	7.383	6.719	7.683	5.803	6.4342					8	41737.7	30.6895
		9	124.569	116.774	110.381	124.346	187.033	132.621					9	6.194	9.904	7.66	7.512	11.785	8.611					9	32183	23.664
		10	122.497	131.244	158.924	126.073	120.257	131.799					10	7.96	8.427	7.12	7.683	8.79	7.996					10	24406.1	17.9456
	4	1	137.563	121.898	200.087	182.928	195.455	167.586	143.67			4	1	11.464	12.388	10.817	10.623	11.211	11.3006	12.8961			4	1	34206.4	25.1518	23.574
		2	159.952	145.986	147.615	179.19	205.007	167.55					2	9.363	7.66	5.966	7.083	5.667	7.1478					2	30069.6	22.11
		3	149.891	125.513	112.577	153.415	128.336	133.946					3	11.932	6.374	9.904	8.09	10.865	9.433					3	33631.9	24.7294
		4	127.282	150.501	112.931	159.099	136.04	137.171					4	8.437	10.45	9.583	6.667	8.437	8.7148					4	27196.7	19.9976
		5	170.237	168.131	217.685	193.909	183.341	186.661					5	47.918	46.963	7.512	12.43	10.937	25.152					5	35223.4	25.8996
		6	88.898	118.828	133.593	120.698	131.999	118.803					6	10.069	8.437	9.511	9.878	11.763	9.9316					6	33194.8	24.4079
		7	148.16	128.803	168.988	136.476	120.214	140.528					7	53.705	40.487	6.25	8.946	8.946	23.6668					7	26390.6	19.4049
		8	86.783	105.386	150.231	164.22	147.352	130.794					8	8.59	7.169	7.289	6.346	8.946	7.668					8	35962.5	26.443
		9	79.394	93.341	108.044	132.51	127.38	108.134					9	5.606	7.096	6.897	6.152	5.789	6.308					9	34725.9	25.5337
		10	133.138	132.605	159.715	152.154	150.03	145.528					10	70.099	6.783	6.482	7.66	7.169	19.6386					10	30003.8	22.0616
	5	1	170.051	146.368	157.22	154.14	207.152	166.986	149.357			5	1	120.279	128.129	70.339	85.111	83.271	97.4258	76.4006			5	1	7792.36	5.72968	6.34941
		2	165.852	165.067	155.333	131.075	127.674	149					2	107.917	159.453	75.926	57.158	94.2	98.9308					2	11912.8	8.75945
		3	167.633	163.639	152.673	163.531	181.454	165.786					3	8.946	7.277	7.096	6.25	8.047	7.5232					3	6033.33	4.43627
		4	166.675	130.323	150.833	171.375	180.574	159.956					4	79.796	96.308	120.974	43.847	48.398	77.8646					4	18638.9	13.7051
		5	119.17	130.024	130.844	125.025	130.323	127.077					5	5.893	5.803	7.784	6.067	6.468	6.403					5	6453.65	4.74533
		6	121.712	111.536	127.633	135.897	94.347	118.225					6	78.622	56.547	73.904	92.74	56.668	71.6962					6	10260.2	7.5443
		7	159.042	144.299	186.466	189.062	173.656	170.505					7	90.451	92.508	100.957	119.014	118.762	104.338					7	5373.44	3.95106
		8	190.795	161.971	129.917	89.233	116.07	137.597					8	139.963	147.34	133.255	114.501	107.707	128.553					8	5419.44	3.98489
		9	160.704	216.174	179.36	138.584	158.765	170.717					9	72.116	59.745	93.039	80.098	111.275	83.2546					9	7384.9	5.43007
		10	141.188	119.658	123.965	111.716	142.08	127.721					10	98.63	89.52	82.18	84.106	85.645	88.0162					10	7082.81	5.20795
	6	1	137.146	125.637	130.971	146.026	90.837	126.123	142.867			6	1	113.037	107.485	96.654	103.435	105.903	105.303	84.183			6	1	5015.1	3.68758	4.28868
		2	137.679	146.442	129.167	112.808	114.552	128.13					2	115.812	73.319	60.188	39.399	8.59	59.4616					2	2943.92	2.16465
		3	140.954	133.998	131.064	137.783	146.107	137.981					3	110.003	102.907	116.585	119.062	125.17	114.745					3	6134.55	4.5107
		4	121.678	114.215	128.722	126.538	130.013	124.233					4	5.017	5.017	6.935	8.004	6.588	6.3122					4	3130.55	2.30188
		5	121.181	149.622	129.692	133.544	136.239	134.056					5	155.751	123.029	123.075	127.628	135.849	133.066					5	3696.35	2.71791
		6	114.194	161.841	150.843	148.101	129.77	140.95					6	4.249	5.48	6.25	5.069	5.48	5.3056					6	9201.91	6.76611
		7	142.522	196.73	176.863	177.169	133.177	165.292					7	111.313	91.713	113.139	114.243	91.259	104.333					7	5735.24	4.21709
		8	161.249	172.627	180.087	137.057	127.677	155.739					8	118.668	94.856	101.572	100.127	91.702	101.385					8	10732.6	7.89165
		9	161.525	174.031	173.879	128.604	123.884	152.385					9	69.667	85.083	120.92	118.961	122.427	103.412					9	9190.62	6.75781
		10	244.559	225.211	126.932	120.13	102.079	163.782					10	123.929	115.196	127.673	83.858	91.872	108.506					10	2545.14	1.87143
	7	1	109.281	133.866	127.938	136.677	151.845	131.921	113.693			7	1	40.043	35.884	10.817	9.592	5.48	20.3632	72.9639			7	1	26753.8	19.6719	14.9938
		2	71.889	70.243	99.471	140.804	135.506	103.583					2	143.312	148.979	68.832	106.4	87.45	110.995					2	24040.3	17.6767
		3	112.355	133.773	147.356	127.328	87.242	121.611					3	68.582	65.119	70.243	59.607	146.512	82.0126					3	21897.4	16.101
		4	72.361	92.406	83.104	127.829	94.667	94.0734					4	108.833	112.843	111.695	131.702	98.711	112.757					4	25391.7	18.6703
		5	102.503	143.5	155.682	134.748	83.221	123.931					5	81.773	90.849	108.014	131.292	137.523	109.89					5	18523.4	13.6202
		6	87.599	74.907	153.082	118.336	92.534	105.292					6	76.5	78.282	115.091	126.663	66.421	92.5914					6	15208.7	11.1829
		7	87.341	100.585	100.173	56.137	100.557	88.9586					7	8.333	6.305	4.877	5.966	5.559	6.208					7	18750	13.7868
		8	108.141	119.734	144.839	166.208	136.239	135.032					8	64.617	100.666	52.559	54.271	47.909	64.0044					8	19456.6	14.3063
		9	124.334	93.393	95.714	134.293	121.166	113.78					9	42.379	43.263	41.334	38.029	50.173	43.0356					9	14672.6	10.7887
		10	110.381	99.617	107.913	139.463	136.354	118.746					10	64.179	89.245	88.396	92.925	104.167	87.7824					10	19221.7	14.1336
	8	1	112.971	137.891	125.836	94.413	103.498	114.922	101.893			8	1	95.015	110.417	71.294	95.023	139.289	102.208	64.1386			8	1	28236.5	20.7621	23.5691
		2	95.688	112.191	125.601	143.885	110.996	117.672					2	72.257	75.844	91.973	92.305	117.575	89.9908					2	28272.7	20.7888
		3	119.867	113.801	96.742	72.801	96.843	100.011					3	84.617	89.738	88.091	97.02	101.742	92.2416					3	39091.5	28.7437
		4	113.593	116.24	116.622	102.269	82.668	106.278					4	8.015	8.907	10.078	9.904	8.7	9.1208					4	30779.2	22.6317
		5	92.018	31.114	121.43	114.807	80.472	87.9682					5	94.157	87.609	99.034	88.236	113.061	96.4194					5	27501.9	20.222
		6	46.286	118.327	119.675	82.078	73.603	87.9938					6	7.083	9.4	7.784	7.784	12.611	8.9324					6	35364.2	26.0031
		7	85.797	120.612	100.295	78.12	125.311	102.027					7	60.434	61.578	70.006	55.692	26.826	54.9072					7	46992.2	34.5531
		8	103.779	120.445	132.796	53.157	71.424	96.3202					8	35.843	38.507	83.334	92.534	98.838	69.8112					8	26042.4	19.1488
		9	107.06	110.532	119.309	82.517	82.605	100.405					9	101.253	82.509	67.563	59.173	76.722	77.444					9	22816.3	16.7767
		10	114.179	119.402	114.761	85.837	92.5	105.336					10	65.001	107.937	12.388	8.271	7.96	40.3114					10	35442.4	26.0606
	9	1	204.92	204.269	191.967	152.775	223.635	195.513	149.997			9	1	97.058	108.66	117.06	122.154	155.878	120.162	83.7599			9	1	19156.3	14.0855	11.1329
		2	113.911	118.184	110.836	209.447	243.609	159.197					2	59.239	58.999	47.15	35.04	19.329	43.9514					2	19862.3	14.6047
		3	113.984	114.167	95.459	141.735	247.55	142.579					3	102.334	97.846	70.105	189.464	193.802	130.71					3	9421.7	6.92772
		4	155.492	109.94	97.646	123.539	149.689	127.261					4	6.25	5.966	5.27	6.36	7.071	6.1834					4	20459.9	15.044
		5	138.927	141.912	173.951	126.669	100.544	136.401					5	112.448	146.811	123.549	111.278	117.266	122.27					5	13511.3	9.93477
		6	168.366	183.577	164.243	162.963	132.44	162.318					6	117.935	120.453	129.851	147.198	123.331	127.754					6	16609	12.2125
		7	96.195	109.5	123.3	143.071	162.714	126.956					7	6.25	5.893	7.12	8.186	6.68	6.8258					7	15077.9	11.0867
		8	123.494	135.229	145.289	186.869	186.968	155.57					8	109.368	137.639	174.846	100.41	26.253	109.703					8	13093.8	9.62776
		9	124.594	112.107	117.441	162.517	182.912	139.914					9	126.873	132.137	120.693	104.407	131.805	123.183					9	18110.2	13.3164
		10	139.468	137.032	164.707	158.03	172.079	154.263					10	70.956	59.496	59.82	36.18	7.828	46.856					10	6105.21	4.48912
	10	1	148.008	133.627	75.208	95.051	114.413	113.261	128.204			10	1	9.148	7.828	9.904	9.317	10.833	9.406	29.9165			10	1	32196.2	23.6737	20.8854
		2	153.986	116.774	99.45	81.667	177.267	125.829					2	10.623	12.72	10.417	12.5	12.43	11.738					2	27858.7	20.4843
		3	193.333	110.05	100	69.247	159.385	126.403					3	11.335	8.59	11.844	10.086	11.494	10.6698					3	30658	22.5426
		4	131.408	100.347	121.318	87.5	133.333	114.781					4	35.321	57.411	52.838	23.57	6.68	35.164					4	23254	17.0985
		5	144.188	183.333	196.73	186.817	186.981	179.61					5	15.64	15.366	12.836	14.837	16.858	15.1074					5	41086.3	30.2105
		6	126.307	142.302	99.349	150.046	148.85	133.371					6	32.798	26.154	39.319	39.142	45.468	36.5762					6	34381.4	25.2805
		7	81.245	153.136	108.231	131.529	199.642	134.757					7	57.267	57.795	65.629	47.516	35.084	52.6582					7	20242.4	14.8841
		8	118.439	118.615	91.712	112.562	190.475	126.361					8	32.577	33.585	35.158	26.575	23.783	30.3356					8	24342.4	17.8988
		9	110.805	131.788	102.106	173.077	146.981	132.951					9	40.676	49.343	52.329	48.714	41.164	46.4452					9	20340.8	14.9565
		10	117.047	88.018	102.838	100.17	65.532	94.721					10	40.88	50.154	50.861	58.269	55.159	51.0646					10	29681.4	21.8246
	11	1	89.513	120.301	108.481	87.341	98.238	100.775	114.445			11	1	132.259	120.082	155.095	124.401	125.069	131.381	106.004			11	1	4999.31	3.67596	8.77888
		2	84.611	100.971	109.608	113.85	99.934	101.795					2	108.177	154.556	157.367	150.608	163.39	146.82					2	9193.75	6.76011
		3	114.994	113.103	121.804	108.199	142.644	120.149					3	123.971	106.413	50.669	63.69	68.876	82.7238					3	12441.8	9.14841
		4	124.928	128.782	108.311	105.768	120.96	117.75					4	108.38	95.616	72.672	58.333	78.095	82.6192					4	9918.4	7.29294
		5	99.951	139.237	94.17	136.333	131.762	120.291					5	93.342	124.809	115.634	114.265	105.746	110.759					5	20136.1	14.806
		6	114.215	130.267	92.406	90.936	66.338	98.8324					6	114.796	112.339	104.514	110.436	104.34	109.285					6	16474.8	12.1138
		7	57.741	89.073	109.218	108.899	61.605	85.3072					7	72.305	61.38	61.154	70.693	64.012	65.9088					7	17661.3	12.9862
		8	125.336	108.449	142.019	185.48	130.836	138.424					8	99.474	106.72	96.355	99.137	80.063	96.3498					8	9878.82	7.26384
		9	135.529	127.061	169.372	193.793	192.646	163.68					9	115.928	109.662	89.626	82.942	91.931	98.0178					9	11805.2	8.6803
		10	114.434	114.894	98.693	97.539	61.689	97.4498					10	116.233	164.021	135.592	121.212	143.829	136.177					10	6883.16	5.06115
0,01 µg tamoxifen/g egg + 20 ng EE2/g egg	1	1	117.148	114.94	98.9	108.477	118.228	111.539	129.541			12	1	59.443	70.664	78.678	91.762	73.368	74.783	85.1277			12	1	23566.8	17.3286	17.3433
		2	207.876	151.284	143.035	170.314	120.868	158.675					2	100.971	97.241	96.347	105.002	91.539	98.22					2	13861.6	10.1924
		3	94.788	84.266	94.799	65.283	109.052	89.6376					3	77.933	111.263	110.975	110.082	114.87	105.025					3	14158.2	10.4104
		4	145.289	167.018	199.2	160.178	163.802	167.097					4	69.253	71.372	74.308	80.183	96.686	78.3604					4	28657.6	21.0718
		5	119.411	138.087	100.059	73.603	67.521	99.7362					5	64.503	72.236	69.693	77.417	87.341	74.238					5	27980	20.5736
		6	166.585	162.113	142.041	147.632	137.26	151.126					6	105.365	88.181	68.654	85.741	96.683	88.9248					6	36477.9	26.822
		7	79.342	88.29	127.023	95.004	90.868	96.1054					7	5.893	6.731	6.935	8.59	8.218	7.2734					7	26131.1	19.214
		8	150.594	153	123.64	145.034	162.201	146.894					8	94.792	96.61	111.403	106.658	110.153	103.923					8	24244.4	17.8268
		9	173.514	110.315	146.837	125.985	165.027	144.336					9	126.096	108.597	114.64	112.578	111.141	114.61					9	16399	12.0581
		10	97	113.984	151.991	107.707	180.634	130.263					10	104.212	110.149	105.298	103.997	105.942	105.92					10	24392.5	17.9357
	2	1	110.202	115.98	137.032	118.163	115.148	119.305	123.975		0,01 µg tamoxifen/g egg + 20 ng EE2/g egg	1	1	63.838	90.164	8.839	9.619	8.829	36.2578	49.2814		0,01 µg tamoxifen/g egg + 20 ng EE2/g egg	1	1	29267.7	21.5204	23.3019
		2	114.943	99.181	127.061	121.478	94.535	111.44					2	117.023	71.929	45.828	52.083	10.45	59.4626					2	28263	20.7816
		3	110.711	106.465	111.583	126.018	150.113	120.978					3	47.706	58.048	116.143	138.169	106.217	93.2566					3	32241.3	23.7069
		4	193.909	160.524	154.607	198.839	140.3	169.636					4	8.375	5.848	6.374	7.132	6.667	6.8792					4	27756.4	20.4091
		5	117.686	127.758	143.822	168.011	126.373	136.73					5	7.289	5.59	5.922	7.083	5.893	6.3554					5	34355.4	25.2613
		6	99.293	129.384	119.745	136.14	99.041	116.721					6	56.668	50.971	8.385	7.649	6.588	26.0522					6	34013.5	25.01
		7	115.941	118.254	94.993	112.944	101.67	108.76					7	82.623	83.372	61.308	53.389	10.45	58.2284					7	32833	24.1419
		8	165.496	159.359	148.644	175.373	115.677	152.91					8	87.107	84.25	8.333	6.25	82.065	53.601					8	38287.7	28.1527
		9	74.054	112.996	103.458	91.203	87.599	93.862					9	105.175	92.804	52.588	86.35	78.463	83.076					9	30060.9	22.1036
		10	121.761	96.645	84.664	82.534	161.46	109.413					10	48.319	99.437	101.469	30.723	68.274	69.6444					10	29827.1	21.9317
	3	1	120.072	136.974	148.924	147.321	76.816	126.021	150.698			2	1	12.528	10.961	10.215	11.258	12.917	11.5758	10.9006			2	1	39765.8	29.2396	25.851
		2	185.077	200.918	194.195	196.683	155.081	186.391					2	15.568	13.572	11.851	14.607	10	13.1196					2	29733.3	21.8627
		3	140.843	124.018	137.187	142.373	156.269	140.138					3	8.829	8.186	7.928	9.363	10.078	8.8768					3	36633.3	26.9363
		4	134.704	128.798	97.788	168.342	150.002	135.927					4	8.59	7.784	9.665	11.319	11.733	9.8182					4	45356.8	33.3506
		5	108.784	187.565	172.643	200.839	211.111	176.188					5	10.549	10.308	11.071	9.878	5.59	9.4792					5	36393.9	26.7602
		6	114.215	104.897	96.184	87.003	141.205	108.701					6	15.618	11.219	10.623	11.118	12.652	12.246					6	26554	19.525
		7	188.344	190.513	188.534	166.987	82.635	163.403					7	13.566	13.156	15.321	12.388	13.623	13.6108					7	38278	28.1456
		8	173.223	206.912	180.279	179.817	158.616	179.769					8	8.79	9.939	9.665	9.619	9.204	9.4434					8	23655	17.3934
		9	125.025	130.833	175.071	136.142	151.422	143.699					9	10.45	8.7	10.45	10.549	9.1	9.8498					9	33518.4	24.6459
		10	166.919	149.176	140.161	141.797	135.649	146.74					10	7.512	11.696	10.549	11.932	13.242	10.9862					10	41685.6	30.6512
	4	1	164.524	122.919	108.077	83.882	82.18	112.316	124.298			3	1	8.76	12.917	11.674	11.674	8.437	10.6924	57.5478			3	1	30414.8	22.3638	24.7853
		2	152.627	155.264	148.024	139.057	122.571	143.509					2	15.662	12.672	12.5	11.524	10.937	12.659					2	28226.2	20.7546
		3	154.857	160.002	148.964	121.898	104.17	137.978					3	92.064	110.07	135.327	110.768	92.605	108.167					3	31860.4	23.4268
		4	118.571	112.528	136.04	119.178	97.557	116.775					4	102.799	135.324	147.785	111.163	105.43	120.5					4	32548.3	23.9325
		5	121.478	112.857	136.333	79.726	101.383	110.355					5	8.839	8.015	13.463	13.794	10.68	10.9582					5	29296.2	21.5413
		6	161.351	166.368	132.762	110.369	118.679	137.906					6	8.344	7.546	8.015	7.132	7.683	7.744					6	31069.6	22.8453
		7	130.365	128.941	130.365	122.803	103.736	123.242					7	115.201	110.991	85.75	59.092	58.917	85.9902					7	35940.6	26.4269
		8	124.2	128.79	105.521	85.383	91.549	107.089					8	60.093	84.338	94.175	99.89	128.804	93.46					8	35548.3	26.1384
		9	125.194	102.987	139.588	122.293	114.276	120.868					9	92.79	116.459	142.83	124.419	105.241	116.348					9	42263.4	31.076
		10	126.189	135.831	141.787	140.062	120.833	132.94					10	8.047	8.375	10.549	9.4	8.427	8.9596					10	39911.8	29.3469
	5	1	134.81	146.887	174.98	153	94.59	140.853	145.104			4	1	83.293	99.363	107.924	110.836	111.469	102.577	58.0898			4	1	30527.6	22.4468	18.3552
		2	138.296	98.728	147.615	98.714	101.119	116.894					2	4.167	4.507	7.649	6.009	6.872	5.8408					2	28873.8	21.2307
		3	161.804	144.801	100.45	119.62	74.167	120.168					3	7.419	7.512	7.96	7.683	8.271	7.769					3	33359.7	24.5292
		4	280.488	179.631	393.279	249.235	204.337	261.394					4	114.676	117.689	124.433	124.419	113.762	118.996					4	17945.3	13.1951
		5	151.001	179.892	163.877	140.223	103.712	147.741					5	11.494	10.172	7.083	6.305	7.906	8.592					5	27895.8	20.5116
		6	130.437	172.419	147.283	166.375	194.367	162.176					6	140.987	94.751	98.137	95.475	118.008	109.472					6	22322.2	16.4134
		7	186.102	155.251	113.804	172.099	271.525	179.756					7	6.36	6.588	10.417	8.79	9.592	8.3494					7	23626.6	17.3725
		8	116.714	130.6	104.22	107.503	85.837	108.975					8	115.022	99.238	123.635	143.586	139.054	124.107					8	33573.3	24.6862
		9	113.529	105.915	85.102	99.17	135.856	107.914					9	65.788	88.39	57.58	86.652	68.521	73.3862					9	12090.3	8.88991
		10	81.671	96.681	109.322	124.814	113.336	105.165					10	34.098	29.277	33.116	6.588	5.966	21.809					10	19415.8	14.2763
	6	1	138.122	113.03	129.928	113.749	128.933	124.752	167.481			5	1	40.867	72.664	40.425	46.101	50.03	50.0174	21.7027			5	1	29674.5	21.8195	24.8907
		2	148.333	161.701	142.5	138.456	151.001	148.398					2	17.687	13.566	12.7	11.373	8.58	12.7812					2	32797.6	24.1159
		3	226.991	167.575	298.191	202.519	185.572	216.17					3	5.59	4.249	4.249	4.751	6.36	5.0398					3	33370.8	24.5374
		4	209.53	203.555	166.435	216.873	239.621	207.203					4	13.649	12.43	10.417	46.773	41.669	24.9876					4	28641.7	21.0601
		5	144.782	139.334	138.974	135.833	100.888	131.962					5	4.29	5.433	5.417	4.658	4.104	4.7804					5	35287.7	25.9468
		6	125.637	129.636	139.069	170.624	200.156	153.024					6	9.834	10.68	9.317	10.937	6.067	9.367					6	28726.2	21.1222
		7	124.167	131.796	150.854	150.836	132.942	138.119					7	13.077	17.129	4.167	5.893	6.482	9.3496					7	27263.9	20.047
		8	155.653	174.456	176.639	146.404	174.678	165.566					8	42.502	48.177	45.338	20.632	4.507	32.2312					8	38663	28.4287
		9	104.499	158.257	174.682	150.78	152.612	148.166					9	33.593	31.094	35.269	8.004	7.96	23.184					9	24760.1	18.2059
		10	217.953	210.967	215.568	283.437	279.335	241.452					10	58.196	67.672	55.909	33.801	10.865	45.2886					10	59327.6	43.6233
	7	1	210.86	202.079	165.111	137.338	74.578	157.993	108.653			6	1	28.871	22.399	23.717	27.817	23.068	25.1744	34.3346			6	1	29182.1	21.4574	19.4869
		2	88.776	125.924	118.257	105.106	96.713	106.955					2	8.549	7.75	8.917	11.585	8.858	9.1318					2	26145.1	19.2244
		3	118.863	122.715	99.6	131.793	104.669	115.528					3	48.236	39.636	28.504	15.281	23.878	31.107					3	28582.3	21.0164
		4	83.521	146.924	109.151	92.305	66.468	99.6738					4	12.169	9.52	9.363	6.522	5.433	8.6014					4	25114.2	18.4664
		5	79.101	77.84	71.229	90.711	100.45	83.8662					5	7.083	7.083	7.862	6.719	7.169	7.1832					5	28270.1	20.7869
		6	116.228	98.548	90.864	95.489	94.347	99.0952					6	43.431	55.933	75.821	71.939	57.833	60.9914					6	30995.8	22.7911
		7	81.654	89.334	137.002	110.164	85.408	100.712					7	68.238	71.182	75.095	35.537	43.978	58.806					7	19688.5	14.4769
		8	98.608	97.646	122.693	84.664	117.023	104.127					8	55.959	72.577	86.604	49.688	25.984	58.1624					8	35780.4	26.3091
		9	157.332	175.192	102.116	85.351	75.166	119.031					9	44.184	51.431	48.448	50.978	47.113	48.4308					9	13897.2	10.2185
		10	96.148	117.772	118.398	89.637	75.778	99.5466					10	32.822	37.065	44.335	29.665	34.901	35.7576					10	27365.8	20.1219
	8	1	124.922	110.846	137.5	100.699	139.866	122.767	135.822			7	1	6.719	6.588	5.154	6.719	6.346	6.3052	7.25842			7	1	39899.8	29.3381	25.8215
		2	170.335	181.311	111.769	126.738	115.434	141.117					2	7.683	9.317	8.498	6.468	7.12	7.8172					2	27517.7	20.2336
		3	71.768	92.018	120.13	114.388	149.949	109.651					3	13.05	10.833	9.223	6.522	5.966	9.1188					3	42565.6	31.2983
		4	187.367	176.58	150.578	140.458	150.231	161.043					4	8.58	9.317	8.59	7.75	8.437	8.5348					4	28537	20.9831
		5	200.724	175.034	196.732	167.964	142.363	176.563					5	6.152	6.731	6.719	4.859	5.922	6.0766					5	41585.8	30.5778
		6	92.571	94.402	92.515	120.945	108.682	101.823					6	7.289	6.588	9.148	6.834	6.25	7.2218					6	31124.3	22.8855
		7	98.714	111.517	126.321	96.354	144.609	115.503					7	6.783	7.75	8.09	6.588	6.783	7.1988					7	26749.3	19.6686
		8	163.864	151.337	155.985	80.506	92.271	128.793					8	7.683	7.372	8.004	5.922	7.169	7.23					8	41312	30.3765
		9	233.11	206.845	192.377	80.433	134.81	169.515					9	7.071	7.096	5.893	5.789	7.75	6.7198					9	39346.7	28.9314
		10	153.428	134.045	148.364	105.505	115.869	131.442					10	6.719	6.468	4.29	6.783	7.546	6.3612					10	32534.7	23.9226
	9	1	88.18	96.526	103.216	111.943	116.801	103.333	146.077			8	1	8.839	6.067	7.096	4.658	3.953	6.1226	6.92504			8	1	40497.6	29.7776	23.5432
		2	162.072	198.964	200.016	172.508	122.588	171.23					2	5.848	5.966	6.346	5.433	6.152	5.949					2	36444.3	26.7973
		3	145.129	147.142	156.846	133.359	90.527	134.601					3	6.346	6.783	5.803	5.27	5	5.8404					3	34580.9	25.4271
		4	128.949	121.795	202.74	190.824	159.169	160.695					4	7.083	7.649	7.289	8.09	7.862	7.5946					4	29987.2	22.0494
		5	117.047	119.658	125.72	104.433	133.651	120.102					5	6.194	6.305	5.848	5.433	7.277	6.2114					5	33004.9	24.2683
		6	154.457	138.506	199.174	146.107	111.212	149.891					6	9.592	6.68	8.047	7.193	8.995	8.1014					6	26194.3	19.2605
		7	88.898	71.322	107.193	136.565	132.311	107.258					7	9.252	7.917	4.583	6.731	6.731	7.0428					7	31538.7	23.1902
		8	153.93	124.052	149.49	134.177	248.959	162.122					8	8.09	8.09	5.833	5.417	4.583	6.4026					8	26318.8	19.352
		9	208.62	202.923	182.637	141.156	158.465	178.76					9	9.167	8.333	6.588	7.12	7.784	7.7984					9	21637.2	15.9097
		10	181.054	157.067	199.757	177.883	148.108	172.774					10	9.501	7.683	6.374	9.363	8.015	8.1872					10	39984.5	29.4004
	10	1	120.052	123.884	156.972	151.348	105.951	131.641	151.4			9	1	6.152	9.148	6.731	8.79	7.372	7.6386	7.45268			9	1	28450.9	20.9198	21.9985
		2	160.078	198.377	237.646	156.403	135.003	177.501					2	9.317	9.501	10.937	8.186	11.25	9.8382					2	27788.2	20.4325
		3	191.813	136.872	154.706	189.387	163.182	167.192					3	8.344	7.906	8.59	10.035	7.683	8.5116					3	36980.6	27.1916
		4	184.167	206.213	204.484	151.422	108.362	170.93					4	3.841	5.086	5.086	4.751	3.584	4.4696					4	39488.7	29.0358
		5	213.86	131.627	121.372	123.04	119.003	141.78					5	5.966	7.12	6.305	5.893	6.783	6.4134					5	26599.7	19.5586
		6	155.378	159.513	111.181	178.031	127.176	146.256					6	7.277	4.507	7.372	7.419	7.683	6.8516					6	33548.6	24.6681
		7	132.584	145.729	168.896	156.181	133.918	147.462					7	6.509	5.017	6.588	8.09	9.763	7.1934					7	20348.3	14.962
		8	167.945	156.476	134.001	115.773	99.878	134.815					8	8.498	7.546	6.783	7.454	7.828	7.6218					8	31749.3	23.3451
		9	115.232	118.977	144.299	184.421	181.5	148.886					9	9.691	7.5	8.09	8.995	7.96	8.4472					9	28139.1	20.6905
		10	139.891	166.435	131.746	169.394	130.219	147.537					10	9.138	5.035	6.783	9.148	7.603	7.5414					10	26086.1	19.181
	11	1	178.146	161.118	142.743	161.841	133.417	155.453	152.922		0,1 µg tamoxifen/g egg + 20 ng EE2/g egg	1	1	9.204	9.167	8.427	10.425	7.512	8.947	8.68122		0,1 µg tamoxifen/g egg + 20 ng EE2/g egg	1	1	33955.9	24.9676	22.3558
		2	153.501	190.922	188.315	136.829	170.249	167.963					2	12.863	13.05	12.937	12.112	10.841	12.3606					2	29535.2	21.7171
		3	112.784	103.85	100.173	109.671	90.139	103.323					3	9.204	8.344	6.667	10.809	6.264	8.2576					3	37649	27.6831
		4	199.168	154.223	125.902	123.04	156.049	151.676					4	8.09	5.606	5.069	5.017	5.017	5.7598					4	38359.9	28.2058
		5	164.22	162.553	158.894	131.985	134.371	150.405					5	11.674	10.833	11.25	8.946	8.271	10.1948					5	30782.1	22.6339
		6	147.651	184.174	145.404	152.557	154.349	156.827					6	14.386	10.308	10.549	8.829	11.258	11.066					6	27426.7	20.1667
		7	134.26	137.523	125.336	156.676	169.333	144.626					7	6.522	8.015	5.59	6.194	5.667	6.3976					7	33292.2	24.4795
		8	116.774	151.063	155.099	150.578	174.716	149.646					8	5.893	6.834	12.198	8.344	7.083	8.0704					8	26364.9	19.386
		9	242.185	217.77	201.682	148.392	142.743	190.554					9	8.015	6.667	6.68	6.588	7.096	7.0092					9	27064.2	19.9002
		10	153.932	206.441	158.36	134.686	140.337	158.751					10	10.817	8.995	5.893	7.5	10.541	8.7492					10	19609.2	14.4185
	12	1	119.968	128.369	98.76	85.655	93.024	105.155	137.009			2	1	11.319	10.308	11.932	9.317	10.712	10.7176	9.94932			2	1	43722.9	32.1492	25.3535
		2	124.502	121.935	110.016	72.481	98.252	105.437					2	10.035	12.112	8.498	9.619	9.904	10.0336					2	30474.1	22.4075
		3	129.36	109.598	186.333	146.887	157.131	145.862					3	9.583	9.754	9.904	10.215	10.308	9.9528					3	36437.8	26.7925
		4	157.22	156.241	153.713	155.264	149.689	154.425					4	10.905	8.498	10.623	9.754	13.706	10.6972					4	30014.2	22.0693
		5	150.058	150.058	132.51	136.669	96.699	133.199					5	9.363	10.541	11.38	13.969	11.607	11.372					5	37412.5	27.5092
		6	163.877	207.152	151.943	172.202	210.043	181.043					6	5.833	7.546	8.7	9.904	14.056	9.2078					6	34830.6	25.6107
		7	125.247	125.399	121.052	195.975	165.103	146.555					7	6.194	7.12	5.803	6.152	4.658	5.9854					7	31371.5	23.0673
		8	118.16	129.757	181.123	138.122	148.523	143.137					8	10.078	8.437	9.148	11.939	13.044	10.5292					8	33334.7	24.5108
		9	107.716	104.19	128.358	177.516	143.914	132.339					9	12.083	12.562	10.549	10.138	10.549	11.1762					9	36669.3	26.9627
		10	157.167	125.734	111.034	104.3	116.452	122.937					10	9.148	9.501	10.865	9.176	10.417	9.8214					10	30540.1	22.456
0,1 µg tamoxifen/g egg + 20 ng EE2/g egg	1	1	159.219	153.03	216.899	206.096	100.847	167.218	120.025			3	1	10.035	9.592	9.176	8.375	7.512	8.938	8.79842			3	1	32441.5	23.854	24.8992
		2	102.147	128.876	144.657	86.703	78.178	108.112					2	12.026	9.4	10.68	8.047	9.363	9.9032					2	21026.6	15.4607
		3	91.667	140.04	245.839	126.01	200.007	160.713					3	8.333	7.096	7.132	8.79	6.68	7.6062					3	37263.7	27.3998
		4	72.62	108.583	99.177	110.645	99.107	98.0264					4	12.672	11.851	10.905	11.696	10.035	11.4318					4	40887.2	30.0641
		5	110.846	135.856	121.67	115.027	109.17	118.514					5	8.375	11.674	10.45	10.425	9.592	10.1032					5	31322.9	23.0316
		6	128.865	104.672	103.726	113.633	77.791	105.737					6	9.252	8.907	8.015	8.375	7.683	8.4464					6	30010.9	22.0669
		7	96.796	100.125	94.347	86.031	106.569	96.7736					7	7.512	7.096	7.906	7.5	8.427	7.6882					7	35414.8	26.0403
		8	105.58	114.94	120.384	90.653	118.571	110.026					8	10.817	7.12	8.76	7.784	7.383	8.3728					8	31545.3	23.1951
		9	121.017	131.098	100.087	116.506	92.045	112.151					9	8.333	7.083	7.193	7.917	9.592	8.0236					9	45412.3	33.3914
		10	122.114	118.922	119.481	109.37	145.034	122.984					10	8.344	6.783	8.839	6.305	7.083	7.4708					10	33304.5	24.4886
	2	1	151.263	151.822	111.471	117.453	151.385	136.679	115.711			4	1	14.796	12.672	14.607	13.649	12.255	13.5958	9.26326			4	1	38777.8	28.5131	26.9114
		2	85.383	91.154	169.609	177.768	169.208	138.624					2	9.223	8.375	10.45	11.441	11.335	10.1648					2	43053.1	31.6567
		3	113.02	126.834	134.559	131.244	149.676	131.067					3	10.417	8.907	7.096	5.848	6.985	7.8506					3	36371.2	26.7435
		4	96.875	86.16	83.707	127.285	105.211	99.8476					4	7.96	7.784	7.917	10.078	8.375	8.4228					4	43258	31.8073
		5	147.735	134.67	103.605	75.655	101.379	112.609					5	7.083	8.498	8.79	7.083	5.803	7.4514					5	40865.3	30.048
		6	152.32	145.022	115.701	86.546	127.628	125.443					6	9.807	9.807	9.317	9.878	9.204	9.6026					6	36368.9	26.7419
		7	88.526	99.349	97.824	99.177	106.213	98.2178					7	7.928	8.427	6.783	9.223	8.375	8.1472					7	37447.4	27.5349
		8	143.798	147.998	142.722	104.38	85.004	124.78					8	7.928	14.006	14.392	10.146	6.36	10.5664					8	33624.5	24.7239
		9	125.858	112.611	101.721	92.064	77.518	101.954					9	10.017	11.281	8.09	7.132	10.078	9.3196					9	27763.5	20.4144
		10	100.847	73.848	73.22	77.195	114.34	87.89					10	6.68	7.096	6.897	9.1	7.784	7.5114					10	28465.6	20.9306
	3	1	88.29	91.962	101.98	100.031	144.638	105.38	120.721			5	1	9.834	7.96	10.078	8.09	7.75	8.7424	8.1546			5	1	21928.6	16.124	25.7326
		2	153.7	116.339	129.636	97.827	94.696	118.44					2	9.014	9.939	8.09	7.169	8.67	8.5764					2	26951.2	19.8171
		3	99.041	140.757	155.586	110.733	113.02	123.827					3	6.482	7.071	6.834	7.96	5.893	6.848					3	35108	25.8147
		4	138.987	126.738	109.424	120.523	103.347	119.804					4	9.807	6.588	6.067	4.751	7.454	6.9334					4	38899.3	28.6024
		5	91.043	120.376	86.35	123.654	120.465	108.378					5	8.67	9.014	6.588	6.36	4.751	7.0766					5	38802.3	28.5311
		6	102.956	125.225	125.222	113.398	135.206	120.401					6	7.66	7.683	7.096	5.086	5.336	6.5722					6	42214.9	31.0404
		7	111.632	118.983	119.681	126.601	158.992	127.178					7	9.763	7.372	7.372	6.719	7.96	7.8372					7	36768.8	27.0358
		8	115.812	104.702	113.02	90.139	150.19	114.773					8	8.333	7.862	12.836	6.834	8.67	8.907					8	32714.2	24.0546
		9	149.071	119.17	125.637	145.662	110.366	129.981					9	8.25	8.59	10.647	10.172	8.015	9.1348					9	38301	28.1625
		10	156.316	149.745	119.519	124.502	145.153	139.047					10	8.975	10.308	14.872	11.118	9.317	10.918					10	38275	28.1434
	4	1	129.435	124.947	129.349	134.562	128.206	129.3	117.576			6	1	9.4	8.498	7.603	6.872	8.09	8.0926	8.85702			6	1	42673.6	31.3777	31.5316
		2	138.734	142.578	153.374	138.506	110.369	136.712					2	9.665	9.501	10.009	7.683	10.68	9.5076					2	45881.6	33.7365
		3	182.584	143.778	116.336	94.641	92.56	125.98					3	11.319	5.417	7.512	8.344	9.619	8.4422					3	42839.9	31.4999
		4	194.167	159.487	99.002	145.414	102.591	140.132					4	8.333	7.083	6.264	10.961	9.252	8.3786					4	52942.2	38.9281
		5	159.507	190.394	170.695	106.2	70.75	139.509					5	9.592	8.79	9.665	7.277	8.75	8.8148					5	38315.5	28.1731
		6	144.169	159.193	133.679	120.488	120.422	135.59					6	11.733	14.319	10	9.807	9.176	11.007					6	45439.6	33.4115
		7	90.653	75.282	78.018	93.132	150.002	97.4174					7	7.083	6.719	6.25	7.5	10.009	7.5122					7	37910.4	27.8753
		8	69.667	102.079	115.003	100.347	82.538	93.9268					8	7.928	7.906	10.215	10.491	10.712	9.4504					8	43646.4	32.0929
		9	128.35	78.639	62.761	137.704	106.589	102.809					9	9.176	10.146	8.09	9.204	8.375	8.9982					9	40146.9	29.5198
		10	67.915	98.506	67.582	49.195	88.726	74.3848					10	7.906	9.665	9.665	7.917	6.68	8.3666					10	39034.4	28.7017
	5	1	148.392	150.891	131.69	140.01	134.208	141.038	132.732			7	1	7.512	6.36	5.433	7.083	6.783	6.6342	8.99814			7	1	32478.1	23.881	26.7384
		2	128.358	140.833	122.526	139.416	140.159	134.258					2	7.862	9.363	8.09	6.719	7.289	7.8646					2	29907.8	21.991
		3	131.69	149.008	136.142	148.354	141.188	141.276					3	7.862	7.083	7.66	6.009	7.75	7.2728					3	37065.1	27.2538
		4	127.358	124.794	153.912	150.87	134.748	138.336					4	8.047	8.76	7.454	6.346	6.194	7.3602					4	36709.6	26.9923
		5	130.067	133.544	149.169	145.469	127.5	137.15					5	11.785	11.118	10.215	9.317	10.817	10.6504					5	45733.2	33.6273
		6	112.808	118.641	143.452	152.557	159.175	137.327					6	7.096	7.512	8.015	7.5	10.009	8.0264					6	41593.1	30.5831
		7	129.722	121.821	115.042	112.525	136.509	123.124					7	12.507	10.009	12.112	12.083	12.944	11.931					7	35005	25.739
		8	119.632	126.34	135.821	131.746	132.004	129.109					8	10.865	10.425	10.425	9.592	11.281	10.5176					8	43694.6	32.1284
		9	122.91	121.135	134.562	133.242	122.639	126.898					9	11.219	9.511	10.623	9.691	9.52	10.1128					9	30367.9	22.3293
		10	94.17	121.315	135.534	115.338	127.682	118.808					10	10.035	11.494	8.59	8.79	9.148	9.6114					10	31088	22.8588
	6	1	130.876	87.694	100.056	90.189	102.639	102.291	104.641		1 µg tamoxifen/g egg + 20 ng EE2/g egg	1	1	8.047	8.995	7.512	11.464	14.24	10.0516	11.0499		1 µg tamoxifen/g egg + 20 ng EE2/g egg	1	1	32263.9	23.7234	24.1655
		2	113.932	122.602	93.367	91.689	100.957	104.509					2	10.841	8.907	14.173	12.611	17.545	12.8154					2	25969.3	19.0951
		3	99.041	111.834	106.386	81.351	75.852	94.8928					3	10.623	8.75	12.562	14.222	12.672	11.7658					3	29434	21.6427
		4	90	100.888	119.272	112.697	126.057	109.783					4	11.607	12.091	16.271	13.907	12.112	13.1976					4	30836.6	22.674
		5	80.017	85.102	109.167	95.179	93.456	92.5842					5	10	11.373	8.015	8.59	8.7	9.3356					5	34302.6	25.2225
		6	72.763	93.341	120.422	167.533	142.149	119.242					6	14.678	13.566	11.281	11.258	7.862	11.729					6	32174.8	23.658
		7	120.301	106.122	72.077	80.251	114.37	98.6242					7	12.611	14.264	12.198	12.083	12.748	12.7808					7	31081.4	22.854
		8	141.885	86.811	80.838	80.069	112.611	100.443					8	8.186	8.829	9.619	7.828	10.291	8.9506					8	39738	29.2191
		9	75.833	146.52	108.915	155.414	150.585	127.453					9	13.907	11.674	11.733	14.655	15.557	13.5052					9	36845.8	27.0925
		10	97.855	95.131	100.998	86.462	102.514	96.592					10	4.877	6.897	7.454	6.346	6.264	6.3676					10	36004.2	26.4737
	7	1	92.113	109.179	144.995	140.974	101.053	117.663	100.985			2	1	11.258	9.583	8.995	9.904	10.549	10.0578	9.69878			2	1	25259	18.5728	23.2762
		2	56.057	70.711	66.007	89.846	58.973	68.3188					2	10.549	10.308	7.906	9.904	10.035	9.7404					2	26646.7	19.5932
		3	67.315	112.571	41.037	48.074	58.902	65.5798					3	8.995	10.712	7.277	6.264	7.96	8.2416					3	33029.3	24.2863
		4	162.177	115.509	103.95	109.205	108.759	119.92					4	9.619	8.498	8.79	8.839	9.1	8.9692					4	34735.1	25.5405
		5	175.127	107.707	105.202	109.103	118.89	123.206					5	9.583	7.512	9.252	8.7	8.79	8.7674					5	40873.3	30.0539
		6	147.519	172.395	121.866	118.977	108.077	133.767					6	10.541	8.839	6.588	9.619	10.291	9.1756					6	31039.8	22.8233
		7	125.8	104.659	99.177	83.208	93.005	101.17					7	12.112	10.009	10.035	11.008	10.035	10.6398					7	27909.4	20.5216
		8	86.703	80.562	85.521	95.489	122.919	94.2388					8	7.917	8.015	7.683	10.809	13.566	9.598					8	38349.7	28.1983
		9	67.767	92.515	96.843	112.549	108.736	95.682					9	11.373	10.961	11.932	10.961	10.017	11.0488					9	27711.5	20.3761
		10	67.89	74.893	91.12	99.17	118.477	90.31					10	10.712	10	8.76	12.652	11.622	10.7492					10	31002.4	22.7959
	8	1	157.659	145.117	104.947	107.125	125.968	128.163	133.762			3	1	10.623	9.727	9.446	9.763	10.086	9.929	8.94416			3	1	42616.8	31.3359	27.6899
		2	146.981	123.111	182.104	119.28	109.37	136.169					2	9.252	11.441	8.004	10.516	8.004	9.4434					2	35457.1	26.0714
		3	107.951	129.658	89.085	71.2	146.107	108.8					3	12.367	11.095	13.869	14.837	11.8	12.7936					3	34833.2	25.6126
		4	113.3	144.811	148.945	139.049	163.048	141.831					4	10.647	9.939	8.437	8.79	8.59	9.2806					4	45087.8	33.1528
		5	214.257	158.241	120.107	153.37	221.973	173.59					5	9.252	9.501	10.035	9.665	10.215	9.7336					5	32881.8	24.1778
		6	161.46	178.205	170.841	129.521	84.971	145					6	7.928	5.966	9.1	6.719	5.667	7.076					6	36841.1	27.0891
		7	128.358	106.122	96.501	111.461	96.627	107.814					7	5.606	8.015	8.59	9.363	8.67	8.0488					7	34513.2	25.3773
		8	148.85	95.365	122.077	153.011	170.459	137.952					8	7.169	6.783	8.59	6.509	5.893	6.9888					8	36431.8	26.7881
		9	129.005	118.933	113.066	111.034	85.7	111.548					9	8.975	10.146	7.132	8.79	6.522	8.313					9	40383.2	29.6935
		10	173.431	125.877	116.67	148.567	169.218	146.753					10	8.549	7.096	6.935	8.59	8.004	7.8348					10	37536.5	27.6003
	9	1	125.069	120.234	137.934	147.481	119.388	130.021	117.689			4	1	8.75	8.271	8.186	8.839	6.264	8.062	6.93544			4	1	31814.8	23.3932	26.6026
		2	63.683	90	75.166	121.67	99.198	89.9434					2	5.922	7.683	6.25	6.588	6.588	6.6062					2	41795.8	30.7322
		3	123.435	156.64	133.427	73.077	66.76	110.668					3	6.522	5.922	5.789	6.783	4.751	5.9534					3	34658.9	25.4844
		4	79.904	85.351	77.572	114.413	75.558	86.5596					4	6.588	7.862	5.893	6.152	8.333	6.9656					4	35744.4	26.2827
		5	87.769	147.255	161.249	57.215	158.046	122.307					5	5.59	7.083	5.59	5.336	6.588	6.0374					5	35991	26.464
		6	139.667	132.112	121.301	167.286	112.376	134.548					6	6.36	8.946	9.317	9.148	10.442	8.8426					6	45515.8	33.4675
		7	87.134	92.976	91.962	110.805	105.409	97.6572					7	6.152	5.086	5.606	6.588	4.167	5.5198					7	33467.4	24.6084
		8	156.625	145.528	198.172	123.564	129.443	150.666					8	7.512	5.966	6.522	7.66	6.731	6.8782					8	28653.1	21.0685
		9	163.225	176.45	157.465	125.28	129.808	150.446					9	8.839	9.252	9.014	7.383	10.035	8.9046					9	36643.2	26.9436
		10	148.258	68.804	82.618	103.162	117.55	104.078					10	4.751	7.512	5.606	4.751	5.303	5.5846					10	37511.6	27.5821
	10	1	170.835	210.081	215.891	172.572	142.5	182.376	153.742			5	1	9.939	9.501	6.152	6.36	8.004	7.9912	9.132			5	1	42700.5	31.3974	30.2061
		2	101.451	87.659	117.453	110.353	134.57	110.297					2	9.363	9.167	7.546	7.546	6.152	7.9548					2	46315.3	34.0554
		3	151.813	173.461	153.777	223.557	231.68	186.858					3	9.428	7.66	11.494	10.086	12.019	10.1374					3	39776.2	29.2472
		4	218.391	190.016	201.667	187.53	165.867	192.694					4	9.511	11.095	8.25	7.169	9.834	9.1718					4	38280.7	28.1476
		5	129.231	115.413	131.606	96.05	101.943	114.849					5	12.72	10.417	8.59	7.372	10.623	9.9444					5	41000	30.1471
		6	127.546	114.215	110.309	131.408	102.798	117.255					6	11.219	8.858	10.607	6.482	7.96	9.0252					6	39865.1	29.3126
		7	95.848	112.512	120.026	115.881	136.758	116.205					7	10.672	11.008	11.095	11.196	9.176	10.6294					7	37354.2	27.4663
		8	311.778	257.522	279.228	268.624	209.492	265.329					8	8.59	11.494	9.727	12.112	10.647	10.514					8	39540.3	29.0737
		9	143.604	124.454	103.313	88.133	111.471	114.195					9	10.017	7.906	7.383	8.946	10.491	8.9486					9	42491.1	31.2435
		10	119.309	134.704	138.629	160.643	133.547	137.366					10	6.834	7.372	7.862	6.588	6.36	7.0032					10	43479.9	31.9705
	11	1	97.243	94.608	54.823	61.469	89.54	79.5366	104.62			6	1	7.383	7.277	7.277	6.067	9.317	7.4642	9.48814			6	1	37622.4	27.6635	31.2314
		2	212.533	163.546	164.707	165.557	140.508	169.37					2	9.807	7.12	9.834	6.935	6.719	8.083					2	32128.6	23.624
		3	138.644	79.486	127.11	106.36	126.373	115.595					3	10.68	11.219	10.712	8.344	9.665	10.124					3	30987.8	22.7852
		4	98.422	87.448	55.057	62.121	37.165	68.0426					4	14.589	14.173	11.696	13.623	12.836	13.3834					4	39284.2	28.8854
		5	138.536	94.887	102.008	89.555	56.722	96.3416					5	9.619	11.335	10.017	14.252	10.146	11.0738					5	40634.2	29.8781
		6	146.953	131.762	124.169	142.743	152.053	139.536					6	11.373	10.009	11.071	11.373	9.317	10.6286					6	37762.7	27.7667
		7	109.218	91.682	64.313	98.326	67.828	86.2734					7	6.194	7.649	5.667	6.897	7.683	6.818					7	49083.7	36.0909
		8	72.481	80.126	69.771	65.596	46.644	66.9236					8	8.829	9.223	8.829	6.935	10.291	8.8214					8	30072	22.1118
		9	61.605	63.119	77.862	70.243	71.361	68.838					9	9.176	4.249	6.152	4.583	8.09	6.45					9	69465.6	51.0777
		10	165.867	163.342	184.338	147.352	117.795	155.739					10	9.939	10.865	11.335	14.167	13.869	12.035					10	57705.6	42.4306
	12	1	186.313	122.511	85.057	65.474	91.992	110.269	118.135			7	1	8.829	8.839	8.498	7.603	6.468	8.0474	7.5121			7	1	33062.8	24.3109	23.7658
		2	142.911	99.041	75.462	90.389	87.281	99.0168					2	5.922	9.014	7.277	6.783	5.789	6.957					2	36029.5	26.4923
		3	112.808	108.538	110.862	90.062	135.165	111.487					3	6.872	4.187	4.859	5.848	6.897	5.7326					3	31851.9	23.4205
		4	154.169	109.195	188.167	136.486	108.337	139.271					4	7.906	6.305	8.549	7.096	8.79	7.7292					4	38974.8	28.658
		5	149.281	96.184	100.201	92.195	62.561	100.084					5	16.271	15.866	13.706	11.932	14.006	14.3562					5	28521.4	20.9716
		6	157.551	82.074	74.284	102.537	80.747	99.4386					6	6.667	6.68	7.096	6.374	6.667	6.6968					6	28674	21.0838
		7	180.805	155.036	81.347	108.941	77.015	120.629					7	6.588	5.035	5.154	6.264	5.966	5.8014					7	29488.7	21.6829
		8	83.371	171.669	156.687	155.853	160.488	145.614					8	5.848	5.069	9.619	7.096	6.68	6.8624					8	31734.9	23.3345
		9	137.032	119.713	163.83	95.616	103.876	124.013					9	4.877	5.27	5.069	5.035	5.27	5.1042					9	31397.9	23.0867
		10	148.644	160.943	147.97	97.057	103	131.523					10	8.839	8.839	8.186	6.783	6.522	7.8338					10	33478.8	24.6168
1 µg tamoxifen/g egg + 20 ng EE2/g egg	1	1	108.044	91.382	128.587	87.003	107.823	104.568	98.5675			8	1	11.373	11.38	8.79	12.148	9.317	10.6016	9.85944			8	1	29177.1	21.4537	27.4809
		2	132.356	113.996	94.535	107.037	113.094	112.204					2	7.928	8.59	5.893	9.904	9.691	8.4012					2	38322.1	28.178
		3	144.407	126.018	121.692	102.865	97.539	118.504					3	9.904	9.317	8.186	8.995	9.583	9.197					3	39994.8	29.4079
		4	117.763	110.962	87.769	97.955	76.603	98.2104					4	13.176	14.494	13.706	10.541	7.906	11.9646					4	40218.1	29.5721
		5	95.924	87.947	94.004	84.369	81.257	88.7002					5	7.649	6.36	4.488	10.291	10.069	7.7714					5	39043.2	28.7083
		6	83.475	74.321	65.596	70.711	81.462	75.113					6	15.866	14.959	13.851	13.566	13.34	14.3164					6	42570.8	31.3021
		7	78.493	77.54	130.003	101.697	107.529	99.0524					7	8.79	7.928	7.096	5.848	11.032	8.1388					7	37262.7	27.399
		8	71.686	79.521	109.37	121.738	118.439	100.151					8	9.878	9.014	9.317	6.194	5.433	7.9672					8	31430.2	23.1104
		9	89.637	105.863	104.22	91.078	95.365	97.2326					9	10.146	9.619	11.38	10.078	9.904	10.2254					9	42795.5	31.4673
		10	96.065	85.102	83.371	93.467	101.697	91.9404					10	9.834	11.8	10.937	7.649	9.834	10.0108					10	32925.2	24.2097
	2	1	110.695	114.616	137.752	103.739	117.408	116.842	113.797			9	1	9.204	9.167	11.859	6.305	9.317	9.1704	10.1303			9	1	26473.6	19.4659	24.9922
		2	156.569	102.798	128.951	114.807	154.236	131.472					2	15.439	15.023	12.87	14.056	8.59	13.1956					2	25418.6	18.6901
		3	100.031	75.998	109.218	91.803	74.284	90.2668					3	8.498	9.138	11.219	11.859	9.939	10.1306					3	41986.6	30.8725
		4	102.798	101.119	128.333	131.048	88.369	110.333					4	10	8.09	7.096	6.264	13.75	9.04					4	36592	26.9059
		5	118.351	121.761	130.347	135.303	93.845	119.921					5	10.425	11.032	10.905	5.433	6.719	8.9028					5	37070.1	27.2575
		6	124.144	106.161	109.829	117.512	100.087	111.547					6	9.317	6.346	6.468	9.317	11.939	8.6774					6	36528	26.8588
		7	102.838	95.179	134.167	126.667	111.146	113.999					7	11.859	7.906	7.512	6.522	11.939	9.1476					7	31983.5	23.5173
		8	109.978	155.646	138.145	148.029	190.467	148.453					8	9.834	14.367	10.672	12.964	11.18	11.8034					8	32554.5	23.9371
		9	109.281	121.712	117.512	102.554	122.511	114.714					9	12.507	12.507	11.373	9.138	11	11.305					9	37651.6	27.685
		10	91.78	95.051	78.639	68.46	68.201	80.4262					10	9.167	11.674	9.807	7.784	11.219	9.9302					10	33635.6	24.7321
	3	1	111.931	118.442	131.985	114.979	92.406	113.949	106.61			10	1	10.937	10.961	13.744	12.091	15.092	12.565	9.38932			10	1	25240.8	18.5594	22.6072
		2	89.88	114.822	63.667	37.268	42.246	69.5766					2	8.375	7.96	11.851	11.674	12.535	10.479					2	34595.7	25.438
		3	63.075	67.185	63.383	65.085	71.976	66.1408					3	7.906	6.985	8.437	7.75	5.966	7.4088					3	31820.5	23.3974
		4	167.747	186.715	221.541	279.446	264.01	223.892					4	13.604	12.311	14.577	13.794	11.577	13.1726					4	29453.3	21.6568
		5	123.671	113.804	82.538	97.057	100.475	103.509					5	11.219	9.904	9.904	8.186	11.38	10.1186					5	30463.5	22.3997
		6	90.676	80.975	51.106	74.129	73.452	74.0676					6	6.374	7.096	6.719	5.48	5.922	6.3182					6	18448.3	13.5649
		7	70.912	87.694	106.23	100.499	74.466	87.9602					7	7.512	7.784	5.035	7.083	7.169	6.9166					7	30393.2	22.348
		8	51.975	78.12	57.795	60.856	59.658	61.6808					8	12.923	11.38	7.096	7.277	8.437	9.4226					8	36755.7	27.0263
		9	206.843	192.709	249.538	198.895	212.729	212.143					9	11.555	11.335	11.25	7.96	11.524	10.7248					9	35083.5	25.7967
		10	66.714	46.852	58.837	53.294	40.225	53.1844					10	7.512	6.719	6.68	4.877	8.047	6.767					10	35203.1	25.8847
	4	1	120.072	104.1	103.078	97.77	93.013	103.607	125.049			11	1	11.622	12.836	11.622	10.425	7.546	10.8102	10.8532			11	1	34313.7	25.2307	22.5962
		2	93.188	101.462	91.712	92.5	81.862	92.1448					2	9.1	7.784	7.277	8.375	10.817	8.6706					2	27344.1	20.106
		3	148.588	173.478	165.238	114.897	134.629	147.366					3	12.672	10.905	10.841	9.204	8.498	10.424					3	27755.9	20.4088
		4	163.276	137.563	135.821	124.502	63.465	124.925					4	10.417	8.79	9.904	5.221	6.719	8.2102					4	28363	20.8552
		5	117.833	117.574	115.845	136.486	103.936	118.335					5	14.631	12.923	11.38	12.43	14.494	13.1716					5	27089.4	19.9187
		6	70.079	111.109	101.112	113.996	76.924	94.644					6	11.071	10.833	8.047	9.223	11.859	10.2066					6	20984.2	15.4296
		7	152.58	159.591	191.927	157.872	148.336	162.061					7	12.262	12.5	14.148	9.223	9.727	11.572					7	34715.5	25.5261
		8	149.919	138.589	125.222	116.07	120.306	130.021					8	8.498	7.906	10.841	10.541	11.38	9.8332					8	33185.9	24.4014
		9	167.9	146.761	144.265	151.504	129.981	148.082					9	10.45	11.851	13.084	12.672	16.298	12.871					9	41139.2	30.2494
		10	125.136	134.603	121.655	125.003	140.121	129.304					10	15.167	12.652	12.255	10.817	12.923	12.7628					10	32417.2	23.8362
	5	1	137.245	143.435	114.078	163.525	126.738	137.004	133.608		10 µg tamoxifen/g egg + 20 ng EE2/g egg	1	1	11.071	11	11.932	10.442	9.834	10.8558	10.3205		10 µg tamoxifen/g egg + 20 ng EE2/g egg	1	1	50565.8	37.1807	26.9991
		2	185.143	143.59	140.666	150.723	110.334	146.091					2	8.09	8.858	7.419	8.59	7.683	8.128					2	34531.6	25.3909
		3	105.843	126.373	138.316	144.609	152.32	133.492					3	8.333	5.606	9.665	10.45	10.425	8.8958					3	45635.1	33.5552
		4	122.616	137.55	155.423	142.071	123.339	136.2					4	5.848	10.009	9.592	12.091	7.132	8.9344					4	32944.4	24.2239
		5	123.654	103.216	111.284	105.211	120.905	112.854					5	9.167	5.417	8.59	9.363	11.258	8.759					5	35819.6	26.338
		6	120.084	131.247	137.966	135.775	135.856	132.186					6	11.008	9.878	13.235	10.937	11.932	11.398					6	30815.1	22.6582
		7	134.177	149.578	138.034	150.695	154.821	145.461					7	11.335	12.148	10.45	11.851	10.865	11.3298					7	37108.3	27.2855
		8	138.506	125.369	116.324	132.238	133.2	129.127					8	11.997	9.727	9.619	12.198	13.975	11.5032					8	33544.4	24.665
		9	123.491	95.015	164.116	148.404	195.372	145.28					9	9.4	8.385	9.904	12.782	9.619	10.018					9	31325.7	23.0336
		10	107.037	125.394	100.17	118.615	140.722	118.388					10	14.731	13.437	14.099	11	13.649	13.3832					10	34897.2	25.6597
	6	1	207.5	183.335	165.833	160.139	176.763	178.714	122.367			2	1	12.198	9.665	12.112	8.79	7.5	10.053	11.6015			2	1	29053.8	21.3631	23.8824
		2	136.631	112.182	116.363	100.847	102.808	113.766					2	13.34	10.541	8.907	8.75	9.252	10.158					2	35183.9	25.8705
		3	175.367	174.454	201.806	183.923	152.591	177.628					3	12.262	9.727	10.308	13.969	10.291	11.3114					3	32987	24.2551
		4	110.334	105.149	120.453	131.239	136.771	120.789					4	9.754	9.754	10.68	8.75	14.386	10.6648					4	30082.6	22.1196
		5	97.272	65.431	64.167	74.209	84.43	77.1018					5	13.75	11.258	11.785	9.204	12.748	11.749					5	42600.9	31.3242
		6	120.767	121.821	134.848	134.673	102.314	122.885					6	11.851	12.652	11.464	11.319	10.809	11.619					6	33649.1	24.742
		7	113.667	131.543	146.159	127.072	112.448	126.178					7	11.851	11.118	10.541	8.995	11.733	10.8476					7	31183	22.9287
		8	112.774	104.499	131.247	91.53	112.503	110.511					8	12.693	16.094	12.255	12.562	14.796	13.68					8	26807.5	19.7114
		9	120.945	101.331	98.39	111.819	46.022	95.7014					9	14.173	12.112	14.589	11.733	15.467	13.6148					9	30301.9	22.2808
		10	100.875	111.383	97.824	92.755	99.125	100.392					10	15.97	15.052	17.104	6.68	6.783	12.3178					10	32951.2	24.2288
	7	1	86.064	86.671	83.882	62.099	67.335	77.2102	87.4086			3	1	7.383	7.12	7.277	8.839	7.277	7.5792	8.04584			3	1	40103.5	29.4878	30.9404
		2	83.437	62.893	61.565	58.529	72.696	67.824					2	6.346	5.417	4.658	5.966	6.985	5.8744					2	55836.8	41.0565
		3	54.575	71.657	72.887	68.744	72.236	68.0198					3	10.291	9.317	8.015	7.083	8.7	8.6812					3	36803.1	27.0611
		4	126.935	264.515	178.796	85.797	101.304	151.469					4	10.017	7.649	8.498	8.839	7.683	8.5372					4	56991.7	41.9056
		5	79.18	100.35	82.907	77.478	121.957	92.3744					5	10.017	9.138	9.428	7.419	7.75	8.7504					5	46536.1	34.2177
		6	75.655	83.221	81.59	81.125	62.21	76.7602					6	7.512	8.917	10.68	8.344	7.419	8.5744					6	38169.3	28.0656
		7	112.75	80.872	108.593	97.272	78.178	95.533					7	5.417	7.277	6.985	5.559	5.803	6.2082					7	41326	30.3868
		8	95.441	105.863	109.218	84.282	53.294	89.6196					8	8.829	6.346	6.374	8.829	10.215	8.1186					8	33666.1	24.7545
		9	108.028	91.001	89.853	64.042	65.005	83.5858					9	8.09	9.592	8.907	11.25	8.907	9.3492					9	32451.6	23.8614
		10	81.556	55.902	103.024	64.399	53.567	71.6896					10	9.138	9.317	8.59	9.223	7.66	8.7856					10	38904.7	28.6064
	8	1	113.74	140.974	120.084	81.552	68.784	105.027	128.225			4	1	9.691	7.862	11.18	12.693	11.441	10.5734	10.9447			4	1	30243.1	22.2375	24.8075
		2	178.516	201.847	153.206	181.77	186.373	180.342					2	10.35	13.017	11.373	8.917	11	10.9314					2	36003.5	26.4731
		3	70.124	79.521	100.295	94.535	125.1	93.915					3	9.878	9.014	11.373	13.869	13.044	11.4356					3	25072.4	18.4356
		4	121.181	118.098	131.429	109.424	73.504	110.727					4	8.829	6.68	8.015	6.194	7.454	7.4344					4	38321.4	28.1775
		5	150.157	108.541	78.643	80.139	68.718	97.2396					5	14.936	16.078	16.078	11.939	7.5	13.3062					5	29564.6	21.7387
		6	168.593	169.421	179.865	176.999	181.858	175.347					6	9.52	8.7	9.501	7.383	10.905	9.2018					6	30422.2	22.3693
		7	125.902	124.814	111.632	97	51.968	102.263					7	14.678	14.099	11.733	11.118	10.905	12.5066					7	35996.9	26.4683
		8	164.287	188.512	177.703	153.236	125.369	161.821					8	10.417	12.836	11.441	13.807	13.851	12.4704					8	35353.8	25.9955
		9	160.035	132.594	120.649	110.996	89.182	122.691					9	14.099	11.071	8.186	8.333	8.498	10.0374					9	37206.1	27.3574
		10	142.892	94.465	165.364	143.783	117.851	132.871					10	11.258	9.727	9.619	15.052	12.091	11.5494					10	39197.7	28.8219
	9	1	89.1	119.376	111.993	119.143	160.167	119.956	103.485			5	1	8.839	10.138	13.156	8.76	14.319	11.0424	9.35624			5	1	28130.2	20.684	27.2055
		2	61.65	121.395	158.336	101.943	100.678	108.8					2	14.678	10.086	8.25	7.419	6.834	9.4534					2	35452.6	26.0681
		3	97.504	96.67	127.652	75.074	43.405	88.061					3	10.078	7.277	9.807	9.665	6.305	8.6264					3	33416.3	24.5708
		4	83.72	71.744	108.72	108.449	106.933	95.9132					4	7.419	6.783	11.741	6.68	11.219	8.7684					4	28111.5	20.6702
		5	134.371	124.569	73.305	79.184	118.051	105.896					5	10.035	8.344	10.138	10.417	6.522	9.0912					5	41030.2	30.1693
		6	139.906	91.02	50.861	129.617	180.979	118.477					6	8.7	9.1	10.138	9.665	8.375	9.1956					6	44134.2	32.4516
		7	92.684	117.795	103.592	99.589	131.667	109.065					7	9.511	9.763	8.218	7.96	8.09	8.7084					7	27711.5	20.3761
		8	129.234	103.337	69.292	61.807	100.888	92.9116					8	12.148	11.844	7.75	10.623	9.727	10.4184					8	48978.1	36.0133
		9	66.468	82.886	113.703	107.215	101.506	94.3556					9	8.218	6.719	10.442	7.928	10.841	8.8296					9	39330.9	28.9198
		10	114.276	72.577	93.337	104.22	122.681	101.418					10	10.623	7.512	9.583	10.249	9.176	9.4286					10	43699.7	32.1321
10 µg tamoxifen/g egg + 20 ng EE2/g egg	1	1	129.808	157.341	165.338	141.139	119.641	142.653	124.482			6	1	11.18	9.754	11.763	8.186	9.904	10.1574	11.0822			6	1	33945.5	24.9599	26.678
		2	86.321	96.05	83.033	86.863	93.322	89.1178					2	16.874	16.874	15.685	12.652	12.148	14.8466					2	37812.7	27.8034
		3	131.999	103.716	96.451	118.977	98.777	109.984					3	12.148	11.997	12.255	12.026	9.167	11.5186					3	32164.2	23.6502
		4	134.27	158.469	153.408	119.745	116.085	136.395					4	9.363	7.169	7.454	7.083	9.138	8.0414					4	55675.3	40.9378
		5	132.062	127.813	72.077	108.375	105.689	109.203					5	10.549	9.204	9.317	7.862	7.66	8.9184					5	23221.7	17.0748
		6	145.512	156.483	149.741	130.746	122.893	141.075					6	13.604	11.932	9.878	10.291	10.146	11.1702					6	33835.8	24.8792
		7	139.256	152.6	145.833	115.428	113.853	133.394					7	9.363	12.304	15.484	13.668	11	12.3638					7	41142	30.2515
		8	126.998	134.34	102.106	118.679	105.541	117.533					8	9.619	9.807	12.672	8.344	10.549	10.1982					8	30571.4	22.4789
		9	139.149	149.956	139.406	111.109	115.95	131.114					9	10.035	10.078	11.674	10.961	13.756	11.3008					9	36356.4	26.7327
		10	127.5	139.428	144.686	141.5	118.662	134.355					10	10.491	9.501	16.51	13.75	11.281	12.3066					10	38095.7	28.0115
	2	1	139.189	137.237	122.588	127.315	142.11	133.688	148.345			7	1	9.176	11.373	12.923	12.134	10.961	11.3134	8.39438			7	1	31990.1	23.5221	24.5827
		2	161.008	141.387	140.557	118.828	125.513	137.459					2	5.433	8.59	7.828	8.207	5.893	7.1902					2	31581.2	23.2215
		3	206.774	266.569	282.013	258.94	129.963	228.852					3	7.917	8.015	7.12	8.975	6.719	7.7492					3	30449	22.3889
		4	142.848	163.963	159.306	152.252	114.894	146.653					4	9.252	8.76	8.76	10.817	11.441	9.806					4	32616.7	23.9828
		5	145.774	151.577	150.785	165.758	117.527	146.284					5	5.417	4.602	8.58	9.363	7.512	7.0948					5	31100.2	22.8678
		6	181.858	137.752	165.17	139.256	115.98	148.003					6	9.52	9.52	8.437	7.828	5.966	8.2542					6	42434.9	31.2021
		7	98.46	96.047	124.68	118.585	114.018	110.358					7	7.5	6.985	5.803	8.015	7.906	7.2418					7	29252.8	21.5094
		8	137.26	149.378	163.989	123.316	114.316	137.652					8	6.783	6.872	7.603	6.588	6.588	6.8868					8	36416	26.7764
		9	162.44	145.912	137.641	146.553	177.038	153.917					9	11.118	10.078	7.193	9.665	9.754	9.5616					9	35509.2	26.1097
		10	146.368	139.237	132.482	134.045	150.78	140.582					10	6.346	6.719	8.207	10.809	12.148	8.8458					10	32974.5	24.2459
	3	1	104.778	107.729	127.129	114.215	68.683	104.507	107.982			8	1	9.428	8.271	10.35	10.172	9.834	9.611	9.53918			8	1	39565.3	29.0921	28.5078
		2	97.272	127.892	135.003	154.203	125.394	127.953					2	9.176	9.204	9.167	8.76	10.249	9.3112					2	40422.4	29.7224
		3	114.849	145.117	128.344	130.724	85.509	120.909					3	13.333	12.262	11	8.09	12.672	11.4714					3	50001.9	36.7661
		4	120.649	126.735	124.267	137.926	125.477	127.011					4	10.308	9.619	11.335	9.52	11.763	10.509					4	44800	32.9412
		5	123.864	133.088	126.373	124.379	90.216	119.584					5	6.346	6.588	8.207	5.59	8.015	6.9492					5	30779	22.6316
		6	73.049	93.11	85.898	119.353	114.252	97.1324					6	10.308	9.501	8.76	9.363	9.691	9.5246					6	40153.3	29.5245
		7	113.728	126.889	119.178	99.878	82.949	108.524					7	9.167	7.928	10.961	10.833	12.977	10.3732					7	38408.9	28.2418
		8	80.139	81.091	68.945	84.315	122.842	87.4664					8	14.367	15.866	11.524	10.035	9.204	12.1992					8	36696.9	26.983
		9	79.604	70.144	86.233	101.523	136.707	94.8422					9	6.985	5.667	7.12	5.221	7.862	6.571					9	36416.3	26.7767
		10	100.056	100.17	78.373	93.341	87.516	91.8912					10	8.7	11	7.277	8.437	8.946	8.872					10	30462.5	22.3989
	4	1	144.976	118.968	130.011	117.875	118.662	126.098	114.923			9	1	10.712	9.204	13.242	14.264	9.665	11.4174	9.60026			9	1	37753.1	27.7597	25.4272
		2	104.738	71.928	85.716	112.626	125.985	100.199					2	9.204	10.45	9.167	9.727	13.084	10.3264					2	36775.5	27.0408
		3	141.483	131.194	93.845	73.678	135.506	115.141					3	7.512	6.731	10.417	8.839	10.035	8.7068					3	40907.6	30.0791
		4	116.264	111.405	122.071	104.193	111.918	113.17					4	10.865	8.385	7.289	8.67	7.75	8.5918					4	39732.8	29.2153
		5	76.603	86.619	112.052	70.833	125.222	94.2658					5	10.623	7.512	6.68	11.859	9.204	9.1756					5	30321.7	22.2954
		6	116.506	131.851	126.057	114.413	101.905	118.146					6	10.035	9.939	12.944	12.528	10.425	11.1742					6	26374.3	19.3929
		7	130.069	121.53	179.004	137.631	139.207	141.488					7	9.363	7.784	11.373	9.167	10.425	9.6224					7	33772.4	24.8326
		8	101.379	117.795	131.006	110.836	93.222	110.848					8	7.132	7.928	7.683	8.047	10.425	8.243					8	30168.2	22.1825
		9	82.798	104.043	136.14	132.926	117.05	114.591					9	9.501	9.1	9.1	9.583	8.58	9.1728					9	31116.5	22.8798
		10	123.738	133.879	124.147	101.83	92.804	115.28					10	8.498	11.319	8.015	9.317	10.712	9.5722					10	38887.3	28.5936
	5	1	121.875	124.477	172.98	155.787	150.794	145.183	120.394			10	1	11.095	10.172	13.077	10.647	12.112	11.4206	10.0502			10	1	24651.9	18.1264	21.0709
		2	102.514	81.692	72.275	78.643	71.2	81.2648					2	8.7	7.649	8.218	7.12	8.7	8.0774					2	26155.7	19.2322
		3	171.29	151.495	153.225	169.241	181.433	165.337					3	9.878	10.833	7.828	10.541	10.249	9.8658					3	25809.9	18.9779
		4	96.267	98.45	78.462	75.042	58.529	81.35					4	11.319	10.45	9.204	8.76	8.427	9.632					4	36596.9	26.9095
		5	195.784	169.421	98.633	97.731	147.615	141.837					5	6.719	12.304	10.442	9.223	6.897	9.117					5	49211.1	36.1846
		6	113.737	142.85	137.752	125.734	90.757	122.166					6	7.906	9.878	8.995	8.59	7.784	8.6306					6	20815.6	15.3056
		7	120.75	108.634	149.613	145.793	138.757	132.709					7	11.219	9.878	9.754	16.796	15.281	12.5856					7	25690.3	18.8899
		8	134.423	140.223	128.65	134.167	132.23	133.939					8	8.271	11.494	8.015	12.367	12.311	10.4916					8	21395.7	15.7321
		9	106.099	99.589	78.142	75.668	72.481	86.3958					9	10.937	11.524	12.112	10.417	11.674	11.3328					9	24837.2	18.2626
		10	118.21	110.962	98.337	114.807	126.497	113.763					10	10.442	9.691	7.862	8.67	10.078	9.3486					10	31400	23.0882
	6	1	77.504	77.643	90.247	125.044	112.549	96.5974	107.302			11	1	8.76	11.38	11.494	11.932	10.086	10.7304	8.11852			11	1	48917.7	35.9689	25.3511
		2	90.849	129.617	106.667	127.072	99.391	110.719					2	7.512	8.437	6.305	10.417	7.917	8.1176					2	32859.5	24.1614
		3	85.91	82.534	85.736	110.987	123.435	97.7204					3	7.083	7.75	8.59	6.194	5.59	7.0414					3	38012.8	27.9506
		4	107.603	81.794	86.514	57.717	109.788	88.6832					4	8.344	5.893	6.783	6.731	6.25	6.8002					4	37219.8	27.3675
		5	72.749	77.54	107.581	135.126	106.667	99.9326					5	6.264	8.186	6.194	7.193	6.194	6.8062					5	35031.6	25.7585
		6	62.86	51.384	79.904	104.416	133.169	86.3466					6	6.25	7.083	9.807	5.433	6.719	7.0584					6	32375	23.8051
		7	72.058	77.504	126.658	128.949	141.249	109.284					7	7.193	7.546	7.546	7.512	10.035	7.9664					7	29080.9	21.383
		8	130.283	113.483	104.725	110.808	151.373	122.134					8	8.946	7.784	9.138	9.904	9.317	9.0178					8	30817.5	22.66
		9	108.66	108.224	126.826	135.041	154.937	126.738					9	10.078	9.501	9.807	5.667	8.975	8.8056					9	25368.1	18.653
		10	87.769	106.484	151.863	168.5	159.696	134.862					10	10.035	9.176	8.047	8.09	8.858	8.8412					10	35091.7	25.8027
	7	1	104.18	140.089	112.364	106.569	108.874	114.415	109.089
		2	114.276	86.731	119.309	81.862	80.623	96.5602
		3	79.813	91.954	101.383	84.315	130.227	97.5384
		4	130.522	98.365	86.683	98.45	91.568	101.118
		5	113.336	109.218	68.84	83.208	162.149	107.35
		6	140.161	117.094	85.85	118.407	102.5	112.802
		7	125.513	78.373	73.527	52.612	86.703	83.3456
		8	91.727	80.902	120.934	155.869	127.503	115.387
		9	133.232	149.761	120.905	132.542	102.242	127.736
		10	149.008	102.585	157.767	136.753	127.061	134.635
	8	1	97.824	97.93	95.576	111.171	96.699	99.84	96.8203
		2	84.984	84.146	70.711	72.62	64.603	75.4128
		3	100.692	73.904	106.279	93.608	100.513	94.9992
		4	93.188	140.362	129.234	101.697	126.921	118.28
		5	91.992	71.57	91.992	105.31	99.502	92.0732
		6	104.516	85.33	80.747	97.372	98.928	93.3786
		7	111.418	91.53	77.046	98.672	96.137	94.9606
		8	94.377	105.948	94.211	91.032	76.035	92.3206
		9	95.237	100.18	73.659	90.204	104.313	92.7186
		10	140.367	122.247	104.416	103.387	100.678	114.219
	9	1	67.087	72.481	91.363	102.314	59.313	78.5116	84.2903
		2	95.891	123.136	101.667	75.508	77.428	94.726
		3	116.696	105.017	90.868	126.669	98.347	107.519
		4	116.714	113.984	96.444	87.694	60.925	95.1522
		5	84.369	65.839	70.833	75.213	66.468	72.5444
		6	70.833	66.667	70.966	70.401	89.637	73.7008
		7	89.202	76.685	60.839	72.577	75.374	74.9354
		8	86.667	98.333	90.004	73.338	78.338	85.336
		9	72.577	104.436	79.447	65.918	79.521	80.3798
		10	57.554	83.437	100.847	80.156	78.493	80.0974
[truncated: 10 more columns]
